# Supplementary material for: Proteomic, gene and metabolite characterization reveal the uptake and toxicity mechanisms of cadmium sulfide quantum dots in soybean plants
Source: Royal Society of Chemistry journal article supplement (doi:10.1039/c9en00599d), 2019-01-01
Supplement: c9en00599d1.xlsx [file c9en00599d1.xlsx]

## Sheet: Table S2
Table S2. Description of the genes and the primer sequences selected for transcriptional analysis
Gene name	GeneID	Gene ID	Protein name	Forward primer sequence	Reverse primer sequence	Gene Ontology
	A. thaliana	G. max				Molecular function	Cellular component	Biological processes
LHY	At1g01060	Glyma19g45030	Homeodomain-like superfamily protein	ATGCAGAAACTTCCGCAGAT	AGCAGCTGCAATAGCTGTCA	DNA binding	Nucleus	Circadian rhythm, long-day photoperiodism, flowering, negative regulation of DNA-binding transcription factor activity, regulation of transcription, response to abscisic acid, auxin, ethylene, jasmonic acid, salicylic acid, gibberellin, alt stress cadmium ion, cold.
BIP3	At1g09080	Glyma05g36620	Probable mediator of RNA polymerase II transcription subunit 37b	GTTGGTGGAAGCACAAGGAT	CTGCTTCATCAGGGTTGACA	ATP binding, ATPase activity, heat shock protein binding, misfolded protein binding, protein folding chaperone	Chloroplast, cytoplasm, endoplasmic reticulum, mediator complex, membrane, nucleus	Cellular response to heat, cellular response to unfolded protein, chaperone cofactor-dependent protein refolding, endoplasmic reticulum unfolded protein response, pollen tube growth, protein folding, protein refolding, response to heat, response to unfolded protein, ubiquitin-dependent ERAD pathway.
HIPP22	At1g22990	Glyma08g14750	Heavy metal-associated isoprenylated plant protein 22	AAGTGGGGTGAAATCTGTGG	GATTTCGCCTTCTTCAGCAC	Metal ion binding	Cytoplasm, membrane	Cadmium ion homeostasis, detoxification of cadmium ion, metal ion transport.
VIT	At1g76800	Glyma10g37030	Vacuolar iron transporter homolog 2	AGCATCAGCTCTTGCATTTTC	CTCCCAAAACCACACCTAGC	Iron ion transmembrane transporter activity, manganese ion transmembrane transporter activity	Integral component of membrane, membrane, vacuolar membrane	Cellular manganese ion homeostasis, cellular response to ethylene stimulus,cellular response to iron ion, cellular response to nitric oxide, intracellular sequestering of iron ion, response to iron ion.
PR1	At2g14610	Glyma15g06800	Pathogenesis-related gene 1	ACACAACGCTGCAAGATCAC	ACCTTTGCGTTGGTTAGCAT	Response to jasmonic acid	Apoplast, cell wall, extracellular region, extracellular space	Defense response, response to vitamin B1, water deprivation, systemic acquired resistance.
SULTR4;2	At3g12520	Glyma18g52270	Probable sulfate transporter 4.2	TCCTGAGTGGTGGTCCTTCT	CAATGGATCAAATGGTGCAG	Anion:anion antiporter activity, sulfate transmembrane transporter activity, symporter activity	Chloroplast, integral component of plasma membrane
PRR5	At5g24470	Glyma19g44970	Pseudo-response regulator 5	CCAAAATCAGTGTGCCAGAA	TCTTCCAACCAGTGATGACG	DNA binding	Intracellular, nucleus	Circadian rhythm, import into nucleus, phosphorelay signal transduction system, photomorphogenesis,regulation of transcription, DNA-templated, response to far red light, rhythmic process
GGCT2;1	At5g26220	Glyma3g080900	Gamma-glutamylcyclotransferase 2-1	CTACGGTTCACTGGTGTGGA	GGTGATCAATGCACGCTAAA	Gamma-glutamylcyclotransferase activity	Cytoplasm	Glutathione catabolic process, response to cadmium ion, response to lead ion
ORF31	AtCg00590	Glyma12g36130	Cytochrome b6-f complex subunit 6	TGCTCACTATAACTAGTTATTTCGGTTT	CAAATAAGTCGTATTTTACTCAGACCA	Electron transporter, transferring electrons within cytochrome b6/f complex of photosystem II activity	Chloroplast, thyllakoid, plastid	Photosynthesis, electron transport chain,oxidation-reduction process
HMA8	At5g21930	Glyma06g056300	Chloroplast copper-translocating HMA8 P-ATPase	CCTTCAAAGCAGGAGAGAGG	AGCGGAGAGGATGTTTTTGA	Cation transport, metal ion transport, ATP hydrolysis coupled cation transmembrane transport	Membrane, integral component of membrane	Nucleotide binding,ATP binding,hydrolase activity, cation-transporting atpase activity, metalion binding
NRAMP6	At1g15960	Glyma15g00350	Metal transporter Nramp6	GCATGCTTAGCAATGTTTGG	AATTGCCCATCTGAATTTCG	Cadmium ion transmembrane transporter activity, inorganic anion transmembrane transporter activity, manganese ion transmembrane transporter activity	Chloroplast, endomembrane system, integral component of membrane	Cadmium ion transmembrane transport, iron ion homeostasis, metal ion transport
TIP2-1	At3g16240	Glyma13g35600	Aquaporin TIP2-1	CGAGCAAAGAGATCCTGAGAA	GGAGAGTCTACTTGGGGTTGG	Ammonium transmembrane transporter activity, identical protein binding, methylammonium transmembrane transporter activity, urea transmembrane transporter activity, water channel activity	Golgi apparatus, cell wall, chloroplast, chloroplast envelope, integral component of membrane, plasma membrane, plasmodesma, protein storage vacuole, vacuolar membrane, vacuole	Transmembrane transport, urea transport, water transport
MT2		Glyma07g13200	Metallothionein type 2	CAACCAACAGCACCAGAAGA	GCAGTTGGCGTACTTGAAGA	Copper ion binding, metal ion binding		Response to copper ion, response to high light intensity
MT1		Glyma14g09310	Metallothionein-like protein 1A	AAGTACGGCAAGATCGAAGG	GCAAGGCCTAGGTTGTTACG	Copper ion binding, metal ion binding	Integral component of membrane	Response to copper ion, response to high light intensity

## Sheet: Table S4
Table S4. List of identified and differentially accumulated proteins (DAPs) in the roots of soybean plants exposed to CTRL, 10 μg/ml ION, 100 μg/ml BULK, and 200 μg/mL CdS-QDs.
Uniprot IDs	Protein names	Gene names	Log transformed LFQ intensities																										DAPs
			CTRL-1	CTRL-2	CTRL-3	ION-1	ION-2	ION-3	BULK-1	BULK-2	BULK-3	QD-BARE-1	QD-BARE-2	QD-BARE-3	QD-TOPO-1	QD-TOPO-2	QD-PVP-1	QD-PVP-2	QD-PVP-3	QD-MAA-1	QD-MAA-2	QD-MAA-3	QD-GLY-1	QD-GLY-2	QD-GLY-3	GOBP name	GOMF name	GOCC name	ANOVA Significant	Peptides	Razor + unique peptides	Unique peptides	Sequence coverage [%]	Unique + razor sequence coverage [%]	Unique sequence coverage [%]	Mol. weight [kDa]	Q-value	Score	Intensity	MS/MS count	-Log ANOVA p value	ANOVA q-value
P26987;C6T1G1;I1KMV1;Q8LJU1;I1KMV0;Q2XQG7	Stress-induced protein SAM22 (Pathogenesis-related protein 10) (Starvation-associated message 22) (allergen Gly m 4)	PR-10 GLYMA_07G243500	29.6462	29.3604	30.1724	31.9157	31.8356	31.8184	32.931	33.4738	33.4598	33.7262	33.9814	33.3002	33.288	33.3573	33.8339	33.5959	33.588	33.9487	34.3072	34.2254	34.0124	33.5897	34.0649	defense response;response to biotic stimulus;response to stimulus;response to stress			+	15	15	7	89.9	89.9	44.3	16.772	0	323.31	220590000000	798	10.573	5.27643e-08
I1NCA0;C6T035;Q02243	Wound-induced protein	GLYMA_19G245400	27.7484	27.6132	27.8255	28.3161	28.4614	28.2196	29.1981	29.7751	29.3629	29.8882	29.8508	29.7694	30.1327	30.1637	29.8451	30.3396	30.0924	30.2859	30.3413	30.3035	29.9489	30.1111	30.5111	defense response;defense response to bacterium;defense response to fungus;multi-organism process;response to bacterium;response to biotic stimulus;response to fungus;response to other organism;response to stimulus;response to stress	binding;carbohydrate binding;chitin binding;pattern binding;polysaccharide binding		+	5	5	3	49.8	49.8	34.6	22.473	0	323.31	18487000000	109	9.91369	1.20399e-07
I1MI59	Uncharacterized protein	100789064 GLYMA_15G211500	31.8368	30.4099	31.1636	31.8894	32.0134	31.5864	33.1376	34.1979	33.3055	35.8607	35.2866	35.5218	34.3369	34.0554	34.858	34.9173	35.1715	35.6717	35.8288	35.2996	35.383	35.1884	35.7102		endopeptidase inhibitor activity;endopeptidase regulator activity;enzyme inhibitor activity;enzyme regulator activity;peptidase inhibitor activity;peptidase regulator activity		+	18	18	16	75.7	75.7	70.9	23.536	0	323.31	561230000000	1256	9.04108	5.98608e-07
B6ZHC0;A0A0R0LK39	PR-5 protein	GmOLPb	28.762	28.8279	28.8169	29.6635	29.6016	28.9127	29.9385	30.5178	30.226	30.6462	30.9604	30.9687	31.5296	31.2251	30.9864	31.2608	31.0385	31.4189	31.4896	31.2094	31.432	31.3093	31.8534				+	9	9	8	43.8	43.8	43.8	25.866	0	323.31	38136000000	319	8.61103	1.1686e-06
I1N362	Peroxidase (EC 1.11.1.7)	100799162 GLYMA_18G211000	28.5032	28.4717	28.3834	30.0038	30.2738	30.6161	30.9537	30.8637	30.7355	30.2501	31.0207	30.4554	31.0646	31.0929	30.9906	31.1453	30.9693	30.5411	30.3479	30.2429	30.2527	30.1461	30.2768	response to chemical stimulus;response to oxidative stress;response to stimulus;response to stress	antioxidant activity;binding;catalytic activity;cation binding;heme binding;ion binding;iron ion binding;metal ion binding;oxidoreductase activity;oxidoreductase activity, acting on peroxide as acceptor;peroxidase activity;tetrapyrrole binding;transition metal ion binding	extracellular region	+	13	13	5	49.1	49.1	20.9	33.347	0	323.31	33733000000	273	8.52871	1.1686e-06
I1M9P8;I1MWJ9	Uncharacterized protein	100790297 GLYMA_14G131300	27.7955	27.8121	27.7777	27.3971	27.4705	27.5868	26.8298	27.1045	27.1568	26.3682	26.26	26.3107	26.3726	25.7277	25.5873	25.1691	25.8863	25.4395	25.6879	25.5254	25.5771		25.574	carbohydrate metabolic process;metabolic process;primary metabolic process	catalytic activity;hydrolase activity;hydrolase activity, acting on glycosyl bonds;hydrolase activity, hydrolyzing O-glycosyl compounds		+	5	5	5	14.7	14.7	14.7	53.057	0	17.757	2234100000	39	8.44128	1.191e-06
C6T3A2	Uncharacterized protein	100527097 GLYMA_17G030400	27.6838		26.4642	29.215	29.0661	29.3379	30.5883	30.3292	30.3744	30.3896	30.766	30.4044	30.6058	30.6893	30.9739	30.6661	30.5936	31.0105	31.1966	31.2057	31.0811	30.8167	31.1216	defense response;response to biotic stimulus;response to stimulus;response to stress			+	14	10	10	90.5	72.2	72.2	16.712	0	260.45	29784000000	230	8.31927	1.35202e-06
I1NFY4;C6SYE6	Uncharacterized protein	GLYMA_20G130000	25.9997	26.268	26.8421	27.4213	27.8508	27.4605	28.9311	29.1979	29.4	30.0797	30.1506	29.7431	30.3763	29.6376	29.5962	29.8473	29.6952	29.6226	29.5471	29.9415	30.0405	29.0729	30.0696				+	8	7	6	38.7	34.2	29.8	25.336	0	59.493	15310000000	139	8.24432	1.40584e-06
I1KEA0;I1KEA1	Uncharacterized protein	100779078 GLYMA_06G260200	29.2408	28.8505	29.0229	30.1799	30.0932	29.7979	31.0716	30.488	30.8499	30.8922	30.8874	31.1031	31.0904	31.0324	30.982	31.3599	30.8446	31.3686	31.3306	31.0592	31.1296	31.3453	31.17				+	12	12	6	38.5	38.5	17.8	37.858	0	40.716	38543000000	198	8.19139	1.41162e-06
Q06197;A0A0R0GQK7;I1JHS8	Isocitrate dehydrogenase [NADP] (IDH) (EC 1.1.1.42) (IDP) (NADP(+)-specific ICDH) (Oxalosuccinate decarboxylase)	IDH1	31.0709	30.9731	30.9093	31.2968	31.258	31.2507	31.8204	31.5285	31.6098	31.8121	31.9134	31.9729	32.081	31.9428	32.1224	31.8921	31.7937	32.0813	31.9703	31.942	31.844	31.8542	31.8833	acetyl-CoA catabolic process;acetyl-CoA metabolic process;carbohydrate metabolic process;carboxylic acid metabolic process;catabolic process;cellular aldehyde metabolic process;cellular carbohydrate metabolic process;cellular catabolic process;cellular ketone metabolic process;cellular metabolic process;cellular process;coenzyme catabolic process;coenzyme metabolic process;cofactor catabolic proc…	binding;catalytic activity;cation binding;coenzyme binding;cofactor binding;ion binding;isocitrate dehydrogenase (NADP+) activity;isocitrate dehydrogenase activity;magnesium ion binding;metal ion binding;NAD binding;nucleotide binding;oxidoreductase activity;oxidoreductase activity, acting on CH-OH group of donors;oxidoreductase activity, acting on the CH-OH group of donors, NAD or NADP as accept…	cell part;cytoplasm;intracellular part	+	21	21	1	46.5	46.5	3.6	46.049	0	323.31	77514000000	441	7.96766	2.12662e-06
I1L738;C6TJ75;K7MTR6	Peroxidase (EC 1.11.1.7)	GLYMA_09G277800	26.4225	26.7992	26.6154	27.8548	27.7391	27.4458	27.6915	27.9435	27.9664	29.2452	29.3477	29.0191	29.3627	28.8857	29.3023	29.199	28.5792	29.2468	29.4519	29.1413	29.0414	29.5934	28.8069	response to chemical stimulus;response to oxidative stress;response to stimulus;response to stress	antioxidant activity;binding;catalytic activity;cation binding;heme binding;ion binding;iron ion binding;metal ion binding;oxidoreductase activity;oxidoreductase activity, acting on peroxide as acceptor;peroxidase activity;tetrapyrrole binding;transition metal ion binding	extracellular region	+	7	7	7	30.4	30.4	30.4	34.215	0	287.99	9268200000	159	7.90823	2.21678e-06
Q9XIS8;C6T586;B1ACD0;Q39869	Trypsin inhibitor p20	p20-1	28.2513	28.9787	28.2755	29.2927	29.1561	28.989	29.7299	30.6339	30.4108	31.0663	30.8909	30.7504	30.6859	31.1543	31.4042	31.08	31.6263	31.3695	31.3551	31.5019	31.048	30.8678	31.6503		endopeptidase inhibitor activity;endopeptidase regulator activity;enzyme inhibitor activity;enzyme regulator activity;peptidase inhibitor activity;peptidase regulator activity		+	8	8	8	52.4	52.4	52.4	22.587	0	323.31	39114000000	213	7.48643	5.36702e-06
I1JL00;I1JKZ8;I1JL02;I1JKZ9	Peroxidase (EC 1.11.1.7)	GLYMA_03G038300	27.3592	26.1925	26.6129	27.334	27.2286	26.3853	27.5871	28.2237	27.7266	29.1873	29.6039	29.4483	29.2607	29.5416	28.9491	29.2585	29.9303	30.7965	30.3491	30.1353	29.6982	29.8523	30.3809	response to chemical stimulus;response to oxidative stress;response to stimulus;response to stress	antioxidant activity;binding;catalytic activity;cation binding;heme binding;ion binding;iron ion binding;metal ion binding;oxidoreductase activity;oxidoreductase activity, acting on peroxide as acceptor;peroxidase activity;tetrapyrrole binding;transition metal ion binding	extracellular region	+	12	12	4	52.6	52.6	21.4	33.031	0	222.41	12831000000	114	7.3378	6.97596e-06
I1ME53	Uncharacterized protein	100805116 GLYMA_15G062400				26.5558	26.494	26.0089	28.9443	29.1245	28.5511	32.1814	30.9575	31.4212	30.7046	30.1761	31.2849	30.28	30.0414	31.2946	31.8871	31.0291	30.339	30.7853	31.2647			extracellular region	+	4	4	4	65.9	65.9	65.9	17.549	0	323.31	34738000000	210	7.16693	9.58221e-06
O04104;A0A0R0E8N5;C6T8P1;A0A0R0EHZ4	Uricase-2 isozyme 2 (EC 1.7.3.3) (Nodulin 35) (N-35) (Non-symbiotic uricase) (Urate oxidase) (Uricase II isozyme 2)		28.3297	28.3554	28.612	28.1944	28.6006	28.561	28.6518	28.7516	28.675	29.7053	29.3673	29.2832	29.0704	29.2141	29.31	28.8505	29.2154	29.9225	30.1629	30.0217	29.3726	29.5385	29.3239	catabolic process;cellular aromatic compound metabolic process;cellular catabolic process;cellular metabolic process;cellular nitrogen compound catabolic process;cellular nitrogen compound metabolic process;cellular process;heterocycle catabolic process;heterocycle metabolic process;metabolic process;nitrogen compound metabolic process;nucleobase metabolic process;nucleobase-containing compound m…	catalytic activity;oxidoreductase activity;oxidoreductase activity, acting on other nitrogenous compounds as donors;oxidoreductase activity, acting on other nitrogenous compounds as donors, oxygen as acceptor;urate oxidase activity	cell part;cytoplasmic part;intracellular membrane-bounded organelle;intracellular organelle;intracellular part;membrane-bounded organelle;microbody;organelle;peroxisome	+	11	11	3	49.5	49.5	13.9	35.137	0	230.72	12086000000	180	7.12476	9.58221e-06
Q9SXM5	Acidic chitinase	chib1-a	28.7576	27.8601	28.3394	29.0425	29.3953	28.4559	29.6509	30.507	30.2551	31.261	30.8613	31.1822	30.7346	30.2779	30.8354	30.6467	30.8837	31.5325	31.4213	31.1966	30.9525	30.6642	31.2536	carbohydrate metabolic process;metabolic process;primary metabolic process	catalytic activity;hydrolase activity;hydrolase activity, acting on glycosyl bonds;hydrolase activity, hydrolyzing O-glycosyl compounds		+	8	8	0	34.9	34.9	0	31.866	0	180.62	31632000000	149	7.10976	9.58221e-06
I1MV71	Uncharacterized protein	100778963 GLYMA_17G147500	27.6509	28.1335	28.3237	28.7482	28.7362	28.3728	28.6917	29.5731	29.4986	30.2051	30.1992	30.3505	29.7522	29.5605	30.5238	30.1851	30.8144	30.1643	30.3063	30.4919	30.6176	30.5318	31.247			extracellular region	+	12	12	8	50.2	50.2	28.7	27.668	0	323.31	20958000000	208	7.0636	1.003e-05
E2FKH7	Sieve element occlusion f	SEOf 100812318 Glyma10g00260 GLYMA_10G000500	31.112	31.0994	30.7124	30.6445	30.7773	30.4111	30.305	30.3452	30.0958	29.8423	29.2745	29.5317	29.0479	29.4088	29.4645	29.7276	29.8625	29.0021	28.7335	28.947	29.2816	28.452	28.8417				+	22	22	5	37.2	37.2	11.9	80.013	0	128.85	22429000000	182	7.01665	1.05542e-05
I1JNN8;C6T2A3;C6T258;I1N9C3	Dirigent protein	GLYMA_03G147700	27.4532	27.2706		28.6831	28.8551	28.4687	30.1938	30.3568	30.6107	30.9187	30.694	30.6213	30.3336	30.0705	30.55	30.5199	29.407	30.4497	30.8971	30.187	30.5253	30.5489	30.5489				+	7	7	2	42.5	42.5	19.4	20.51	0	174.99	26226000000	159	6.97837	1.09199e-05
I1JAQ7	Uncharacterized protein	100803381 GLYMA_01G235600	29.7795	29.1569	29.7366	30.3988	30.1499	30.6231	31.0178	30.8921	31.2408	30.7737	31.2889	31.1694	31.1852	31.3797	31.2476	31.179	31.2446	31.5873	31.4947	31.3379	31.3661	31.2493	31.4054		binding;catalytic activity;coenzyme binding;cofactor binding;FMN binding;nucleotide binding;oxidoreductase activity		+	23	23	10	64.4	64.4	23.6	45.185	0	200.69	44800000000	313	6.89876	1.22372e-05
I1LBH6	Uncharacterized protein	100820325 GLYMA_10G159600	32.2027	32.2776	32.496	31.8666	31.9784	32.0362	31.6093	31.1841	31.4139	30.5166	30.2836	30.3504	30.1866	30.7288	30.6688	30.6389	31.3797	30.1885	30.0625	29.9208	30.4549	30.3536	29.6291		catalytic activity;transferase activity;transferase activity, transferring acyl groups;transferase activity, transferring acyl groups other than amino-acyl groups		+	19	19	19	44.2	44.2	44.2	50.502	0	323.31	52781000000	378	6.88545	1.22372e-05
I1N5R9	Formate dehydrogenase, mitochondrial (FDH) (EC 1.17.1.9) (NAD-dependent formate dehydrogenase)	100796009 GLYMA_19G009000	30.5184	30.4265	30.3246	31.9416	31.4103	31.358	32.3972	31.8639	31.7086	31.7737	32.3477	32.3719	32.8779	32.5053	32.2404	32.4729	32.2962	32.5872	32.6635	32.5845	32.6398	32.6165	32.3729		binding;catalytic activity;coenzyme binding;cofactor binding;NAD binding;nucleotide binding;oxidoreductase activity;oxidoreductase activity, acting on CH-OH group of donors;oxidoreductase activity, acting on the CH-OH group of donors, NAD or NADP as acceptor		+	21	21	8	68.3	68.3	28.8	41.305	0	323.31	106820000000	609	6.81773	1.36518e-05
P24095;A0A0R0J5A9;A0A0R0IXU0;Q41244	Seed linoleate 9S-lipoxygenase (EC 1.13.11.58) (Lipoxygenase)	LOX1.4 SC514	36.2881	35.9968	36.5036	35.8199	35.6908	35.9032	35.7608	34.961	34.9396	34.3876	34.4384	34.5616	34.7299	34.9726	35.3006	35.111	35.2454	34.3726	34.3787	34.5741	34.6564	34.5496	34.3622	biosynthetic process;carboxylic acid biosynthetic process;carboxylic acid metabolic process;cellular biosynthetic process;cellular ketone metabolic process;cellular lipid metabolic process;cellular metabolic process;cellular process;fatty acid biosynthetic process;fatty acid metabolic process;lipid biosynthetic process;lipid metabolic process;metabolic process;monocarboxylic acid metabolic proces…	binding;catalytic activity;cation binding;dioxygenase activity;ion binding;metal ion binding;oxidoreductase activity;oxidoreductase activity, acting on single donors with incorporation of molecular oxygen;oxidoreductase activity, acting on single donors with incorporation of molecular oxygen, incorporation of two atoms of oxygen	cell part;cytoplasm;intracellular part	+	61	60	47	65.5	65.5	52.3	96.816	0	323.31	858080000000	1982	6.72488	1.5498e-05
K7MNM4;I1MXL3	Uncharacterized protein	100805702 GLYMA_17G239000	31.5146	31.153	31.5409	31.4989	31.6325	31.7	31.9285	31.9337	31.7969	32.0181	31.9481	32.1078	32.2968	32.0635	32.332	32.3401	32.5581	32.698	32.5307	32.4332	32.3289	32.165	32.2087		catalytic activity;cysteine-type peptidase activity;hydrolase activity;peptidase activity;peptidase activity, acting on L-amino acid peptides		+	15	15	5	37.2	37.2	12.1	48.751	0	323.31	94011000000	655	6.72486	1.5498e-05
I1MRA7;Q70EW1	Amine oxidase (EC 1.4.3.-)	GLYMA_17G019300	34.8736	34.9808	35.2075	34.9461	35.3615	34.7292	33.6175	33.6628	34.3829	33.1498	32.7589	32.4483	33.2521	33.4513	33.0889	33.4171	33.6852	32.7833	32.3946	32.9398	32.8046	31.8005	32.4658	amine metabolic process;metabolic process;nitrogen compound metabolic process	binding;catalytic activity;cation binding;cofactor binding;copper ion binding;ion binding;metal ion binding;oxidoreductase activity;oxidoreductase activity, acting on the CH-NH2 group of donors;oxidoreductase activity, acting on the CH-NH2 group of donors, oxygen as acceptor;primary amine oxidase activity;quinone binding;transition metal ion binding		+	34	34	33	54.5	54.5	53.4	75.822	0	323.31	334590000000	1094	6.6007	1.98019e-05
I1LHU4;C6TB22;K7LNG2;I1J8T3;A0A0R0LCL9;A0A0R0LJ03	Uncharacterized protein	100780246 GLYMA_11G070200	28.1087	27.8044	28.378	28.3972	28.5799	28.2628	29.1771	29.156	29.3209	29.4452	29.3234	29.1368	28.9731	28.9341	29.722	29.4351	29.6605	29.4627	29.6482	29.1705	29.2156	29.0347	29.1667				+	10	10	7	45.5	45.5	31.8	34	0	240.33	12728000000	99	6.5811	1.99192e-05
A0A0R0E4P4;K7KDJ6	Laccase (EC 1.10.3.2) (Benzenediol:oxygen oxidoreductase) (Diphenol oxidase) (Urishiol oxidase)	100812879 GLYMA_U027400	30.4871	30.6743	30.3602	30.7832	31.0395	30.7238	31.0368	31.4286	30.9933	32.1143	32.141	32.058	32.1397	32.0294	31.9239	32.4233	32.8508	31.8959	31.8082	31.7802	32.0413	31.6449	32.17	aromatic compound catabolic process;catabolic process;cellular aromatic compound metabolic process;cellular catabolic process;cellular metabolic process;cellular process;lignin catabolic process;lignin metabolic process;metabolic process;phenylpropanoid catabolic process;phenylpropanoid metabolic process;secondary metabolic process	binding;catalytic activity;cation binding;copper ion binding;hydroquinone:oxygen oxidoreductase activity;ion binding;metal ion binding;oxidoreductase activity;oxidoreductase activity, acting on diphenols and related substances as donors;oxidoreductase activity, acting on diphenols and related substances as donors, oxygen as acceptor;transition metal ion binding	apoplast;extracellular region	+	11	11	11	26.6	26.6	26.6	60.816	0	279.74	72235000000	232	6.45781	2.45686e-05
I1KAB0	Aldehyde dehydrogenase	100783726 GLYMA_06G114300	27.2049	26.4721	27.2109	27.2422	27.7874	27.6315	28.4496	28.3615	28.3511	28.7704	28.7058	28.6109	28.6497	29.0313	28.8636	28.8439	29.249	28.9082	28.9339	29.4802	28.8881	28.4894	28.8321	cellular aldehyde metabolic process;cellular metabolic process;cellular process;metabolic process	aldehyde dehydrogenase [NAD(P)+] activity;catalytic activity;oxidoreductase activity;oxidoreductase activity, acting on the aldehyde or oxo group of donors;oxidoreductase activity, acting on the aldehyde or oxo group of donors, NAD or NADP as acceptor		+	10	10	6	22.8	22.8	13.4	53.916	0	167.64	7828900000	109	6.45914	2.45686e-05
I1ML63	Uncharacterized protein	100789257 GLYMA_16G044600	28.4656	28.2868	28.6891	28.4655	28.5007	28.6146	28.9081	28.9404	29.2157	29.3728	29.2436	29.3552	29.1704	28.9805	29.1538	29.2154	29.087	29.259	29.4183	29.4633	29.2988	29.409	29.2399	acetate metabolic process;acetyl-CoA biosynthetic process;acetyl-CoA biosynthetic process from acetate;acetyl-CoA metabolic process;biosynthetic process;carboxylic acid metabolic process;cellular biosynthetic process;cellular ketone metabolic process;cellular metabolic process;cellular process;coenzyme biosynthetic process;coenzyme metabolic process;cofactor biosynthetic process;cofactor metaboli…	acetate-CoA ligase activity;acid-thiol ligase activity;adenyl nucleotide binding;adenyl ribonucleotide binding;AMP binding;binding;catalytic activity;CoA-ligase activity;ligase activity;ligase activity, forming carbon-sulfur bonds;nucleotide binding;purine nucleotide binding;purine ribonucleotide binding;ribonucleotide binding		+	11	11	1	18.4	18.4	1.1	83.984	0	32.919	11360000000	126	6.42123	2.5806e-05
P38417;B3TDK7	Linoleate 9S-lipoxygenase-4 (EC 1.13.11.58) (Lipoxygenase-4) (L-4) (VSP94)	LOX1.5 LOX4	36.5317	36.3735	36.8584	36.2442	35.9562	36.0051	36.3671	35.525	35.4419	34.7892	34.7645	34.9369	35.3397	35.6723	35.6077	35.6304	35.6646	34.6003	34.6541	34.9369	34.7968	34.7341	34.566	biosynthetic process;carboxylic acid biosynthetic process;carboxylic acid metabolic process;cellular biosynthetic process;cellular ketone metabolic process;cellular lipid metabolic process;cellular metabolic process;cellular process;fatty acid biosynthetic process;fatty acid metabolic process;lipid biosynthetic process;lipid metabolic process;metabolic process;monocarboxylic acid metabolic proces…	binding;catalytic activity;cation binding;dioxygenase activity;ion binding;metal ion binding;oxidoreductase activity;oxidoreductase activity, acting on single donors with incorporation of molecular oxygen;oxidoreductase activity, acting on single donors with incorporation of molecular oxygen, incorporation of two atoms of oxygen	cell part;cytoplasm;intracellular part	+	67	67	1	66.5	66.5	0.8	96.534	0	323.31	1136400000000	2262	6.39414	2.65513e-05
I1LU53	Aconitate hydratase (Aconitase) (EC 4.2.1.3)	100794803 GLYMA_12G193800	31.432	31.3638	31.5058	31.89	31.7836	31.7779	32.0649	31.9038	31.9831	31.9896	31.9433	31.9296	32.1286	31.9391	32.1022	32.0722	32.1881	31.9971	32.101	31.9803	31.9797	31.8074	31.8621		4 iron, 4 sulfur cluster binding;aconitate hydratase activity;binding;carbon-oxygen lyase activity;catalytic activity;hydro-lyase activity;iron-sulfur cluster binding;lyase activity;metal cluster binding		+	36	36	2	44.8	44.8	4	107.24	0	323.31	89900000000	843	6.37555	2.68183e-05
K7K6E6;Q9SDY6;I1JCB6	Uncharacterized protein	547572 GLYMA_02G042500	26.3011	24.1771	26.2562	27.984	28.2521	27.6736	29.1258	29.8377	30.3399	31.8319	30.5272	31.3586	30.3245	29.5612	30.7581	29.8933	29.837	30.4688	31.2687	30.9242	30.679	29.7587	30.7572	amine metabolic process;aminoglycan catabolic process;aminoglycan metabolic process;carbohydrate catabolic process;carbohydrate metabolic process;catabolic process;cell wall macromolecule catabolic process;cell wall macromolecule metabolic process;chitin catabolic process;chitin metabolic process;macromolecule catabolic process;macromolecule metabolic process;metabolic process;nitrogen compound m…	binding;carbohydrate binding;catalytic activity;chitin binding;chitinase activity;hydrolase activity;hydrolase activity, acting on glycosyl bonds;hydrolase activity, hydrolyzing O-glycosyl compounds;pattern binding;polysaccharide binding		+	12	12	12	57.5	57.5	57.5	33.714	0	323.31	25454000000	219	6.32306	2.9318e-05
C6T1N0;Q9XFB4	PR1a	PR1a		27.3393		26.0415	26.4747	27.2712	26.8608	26.4555	26.9284	28.3626	28.9257	28.5395	31.2147	30.7705	32.2553	31.7697	29.9176	29.6765	30.6542	31.2963	31.4327	32.0387	31.8029			extracellular region	+	7	7	7	55.2	55.2	55.2	18.827	0	323.31	27672000000	199	6.28534	3.10091e-05
C6SXD0	Uncharacterized protein	100499848 GLYMA_08G230500	33.5383	33.5643	34.0305	33.7895	33.4787	33.3517	33.6147	32.8449	32.9715	31.9438	32.054	31.957	32.0963	32.6883	32.6371	32.617	32.8641	31.4574	31.5285	32.1393	31.9874	31.4667	31.7095	defense response;response to biotic stimulus;response to stimulus;response to stress			+	12	12	8	85.6	85.6	54.2	17.762	0	291.48	156440000000	317	6.20489	3.57491e-05
K7LC34	Calcium-transporting ATPase (EC 3.6.3.8)	100820121 GLYMA_09G061200	28.0656	27.8852	28.0994	27.5195	27.6087	27.6162	27.5899	27.6351	26.9891	26.7159	26.8708	26.969	27.1314	26.9351	27.1637	27.0224	26.9801	26.6561	26.3332	26.6649	26.8399	26.5774	26.6881		active transmembrane transporter activity;adenyl nucleotide binding;adenyl ribonucleotide binding;ATP binding;ATPase activity;ATPase activity, coupled;ATPase activity, coupled to movement of substances;ATPase activity, coupled to transmembrane movement of ions;ATPase activity, coupled to transmembrane movement of ions, phosphorylative mechanism;ATPase activity, coupled to transmembrane movement o…	cell part;integral to membrane;intrinsic to membrane;membrane part	+	6	6	2	6	6	2.4	117.9	0	13.23	3224100000	29	6.19801	3.57491e-05
Q2LAJ5;I1KKQ1;I1KKQ2	Cytochrome P450 monooxygenase CYP74A1	CYP74A1	29.2846	28.9652	29.4968	28.6718	28.6819	27.9844	27.8303	27.8998	27.2243	26.4763	26.7154	26.0312	27.0108	27.0145	26.5536	26.7201	27.8083	26.7684	26.795	26.6664	26.5602	25.8592	26.1825		binding;catalytic activity;cation binding;heme binding;ion binding;iron ion binding;metal ion binding;monooxygenase activity;oxidoreductase activity;oxidoreductase activity, acting on paired donors, with incorporation or reduction of molecular oxygen;tetrapyrrole binding;transition metal ion binding		+	11	11	11	30	30	30	54.876	0	146.55	4755300000	78	6.18105	3.61401e-05
C6SYB8	Uncharacterized protein	100306181 GLYMA_20G129900	26.9872	25.7879	25.3059	25.498	25.8428	26.1192	27.7319	28.541	27.494	30.4889	29.249	29.2496	28.9451	28.2992	28.9892	28.4311	28.4544	29.121	29.1324	28.6607	28.8918	28.8181	28.6332				+	9	9	7	48.9	48.9	40	25.182	0	26.581	8327900000	80	6.13638	3.89733e-05
I1LAY3;K7LJD7	Uncharacterized protein	100790707 GLYMA_10G142500	29.7287	30.0279	29.2378	29.5844	29.1872	29.5482	26.8917	27.8831	25.7041	26.0931	26.0916	26.1921	26.1833	27.2813	25.9236	25.7542		24.2348	23.6748	25.0383	26.6579	25.3841	26.7883				+	26	26	26	47.8	47.8	47.8	101.42	0	323.31	5483400000	115	6.07486	4.37227e-05
I1KC56	Uncharacterized protein	100781379 GLYMA_06G172000	29.4954	29.0707	29.4179	29.7108	29.7629	29.5833	30.07	30.0571	30.0462	30.3957	30.3725	30.2725	30.4354	30.087	30.5639	30.6768	30.1725	30.5791	30.5404	30.5975	30.5345	30.3251	30.7278		aminopeptidase activity;binding;catalytic activity;cation binding;exopeptidase activity;hydrolase activity;ion binding;metal ion binding;metallopeptidase activity;peptidase activity;peptidase activity, acting on L-amino acid peptides;transition metal ion binding;zinc ion binding		+	21	21	8	52.4	52.4	16.4	53.289	0	323.31	27761000000	323	6.00813	4.92425e-05
Q9FST0;P93159;I1LWZ7	Beta-glucan binding protein	GBP	28.7931	29.1834	28.5948	28.8853	29.2903	29.0009	29.4536	29.8982	29.5322	29.4395	29.5702	29.5325	30.0222	30.0165	30.3711	30.3077	29.8255	30.0461	30.2334	30.1893	30.3113	30.1948	30.2679	catabolic process;cell wall macromolecule catabolic process;cell wall macromolecule metabolic process;macromolecule metabolic process;metabolic process			+	25	25	25	44.6	44.6	44.6	74.607	0	323.31	20492000000	338	6.00095	4.92425e-05
I1M138	Uncharacterized protein	100807221 GLYMA_13G208000	25.4966	25.5982	26.359		26.8776	26.3548	26.2981	27.1686	27.7431	28.8067	28.7049	29.0806	28.498	28.0014	27.6609	28.5878	28.3659	29.3497	29.072	29.0063	28.8097	28.7261	29.3024		aspartic-type endopeptidase activity;aspartic-type peptidase activity;catalytic activity;endopeptidase activity;hydrolase activity;peptidase activity;peptidase activity, acting on L-amino acid peptides		+	8	8	8	26.6	26.6	26.6	51.191	0	46.387	6574200000	74	5.9335	5.47775e-05
I1MNX4	Glutathione reductase (GRase) (EC 1.8.1.7)	100783766 GLYMA_16G155700	29.511	29.5713	29.4806	29.7734	30.1648	29.7595	30.2966	30.517	30.433	30.6628	30.4578	30.463	30.5236	30.4867	30.4235	30.4235	30.8489	31.0485	30.7796	30.6234	30.6328	30.5201	30.5202	amine metabolic process;biological regulation;carboxylic acid metabolic process;cell redox homeostasis;cellular amine metabolic process;cellular amino acid metabolic process;cellular homeostasis;cellular ketone metabolic process;cellular metabolic process;cellular modified amino acid metabolic process;cellular nitrogen compound metabolic process;cellular process;glutathione metabolic process;home…	antioxidant activity;binding;catalytic activity;coenzyme binding;cofactor binding;disulfide oxidoreductase activity;flavin adenine dinucleotide binding;glutathione disulfide oxidoreductase activity;glutathione-disulfide reductase activity;NADP binding;nucleotide binding;oxidoreductase activity;oxidoreductase activity, acting on a sulfur group of donors;oxidoreductase activity, acting on a sulfur …		+	17	17	5	42.3	42.3	12.6	53.991	0	165.53	30429000000	270	5.93857	5.47775e-05
I1JE14	Glycosyltransferase (EC 2.4.1.-)	100815146 GLYMA_02G104300	25.9477	26.0639	25.7972	27.0648	26.9286	26.3147	27.4332	27.6844	27.7965	27.5257	28.0003	27.7021	27.3042	27.3507	27.4543	27.1607	27.0996	27.7428	27.592	27.2804	27.4115	27.1913	27.2521		catalytic activity;transferase activity;transferase activity, transferring glycosyl groups;transferase activity, transferring hexosyl groups		+	13	13	10	26.7	26.7	21.1	53.237	0	149.58	3273100000	90	5.89389	5.86128e-05
I1MRM5;C6SZ24	Uncharacterized protein	GLYMA_17G030100	27.4434	27.8555	27.9536	28.753	29.0465	28.1446	29.2006	29.3614	29.4117	29.3985	29.3371	29.5083	29.4319	29.2529	29.575	29.5664	29.5652	29.5172	29.7749	29.287	29.3317	29.8054	29.3985	defense response;response to biotic stimulus;response to stimulus;response to stress			+	10	10	10	79.6	79.6	79.6	17.112	0	75.917	13168000000	96	5.86811	6.07832e-05
I1L314	Heat shock protein 90-1	100811234 GLYMA_09G131500	27.9861	27.8207	27.6457	28.4582	28.1418	28.2413	29.119	29.1631	29.2262	28.2346	28.6866	28.3874	28.6015	29.166	28.6486	28.8498	29.2125	27.9798	27.9861	27.7998	27.9958	27.83	27.6952	cellular macromolecule metabolic process;cellular metabolic process;cellular process;cellular protein metabolic process;macromolecule metabolic process;metabolic process;primary metabolic process;protein folding;protein metabolic process;response to stimulus;response to stress	adenyl nucleotide binding;adenyl ribonucleotide binding;ATP binding;binding;nucleotide binding;purine nucleotide binding;purine ribonucleoside triphosphate binding;purine ribonucleotide binding;ribonucleotide binding		+	28	15	2	44.5	26.9	4.1	80.388	0	103.98	8215800000	78	5.801	6.93637e-05
C6TJG9;A0A0R4J2M7;A0A0R4J5K4;C6TNY3;C6TN03;A0A0R4J581;I1JL82;A0A0R0L9T9	40S ribosomal protein S4		30.8572	30.9632	31.0266	30.8269	30.8544	30.9658	30.8126	30.6343	30.418	30.2773	30.1386	30.7291	30.2375	30.2626	30.4544	30.2947	30.3266	29.8816	29.8426	29.8161	29.9007	29.8669	30.151	biosynthetic process;cellular biosynthetic process;cellular macromolecule biosynthetic process;cellular macromolecule metabolic process;cellular metabolic process;cellular process;cellular protein metabolic process;macromolecule biosynthetic process;macromolecule metabolic process;metabolic process;primary metabolic process;protein metabolic process;translation	binding;nucleic acid binding;RNA binding;rRNA binding;structural constituent of ribosome;structural molecule activity	cell part;cytoplasmic part;intracellular non-membrane-bounded organelle;intracellular organelle;intracellular part;macromolecular complex;non-membrane-bounded organelle;organelle;ribonucleoprotein complex;ribosome	+	16	16	2	54.2	54.2	11	29.842	0	167.32	31322000000	139	5.73422	7.88708e-05
I1MEE6;I1M285	Uncharacterized protein	100803171 GLYMA_15G071200	27.1525	26.4586	26.8259	26.9854	26.6622	26.2764	28.0249	28.4407	28.2576	29.211	29.0164	28.7818	28.386	28.6233	29.0877	28.5422	28.8309	28.8661	28.5176	28.6321	28.2941	27.9987	29.342	biosynthetic process;metabolic process;pigment biosynthetic process;pigment metabolic process	binding;catalytic activity;catechol oxidase activity;cation binding;ion binding;metal ion binding;oxidoreductase activity;oxidoreductase activity, acting on diphenols and related substances as donors;oxidoreductase activity, acting on diphenols and related substances as donors, oxygen as acceptor		+	10	10	7	25.4	25.4	19.3	67.819	0	219.87	7143200000	120	5.72633	7.88708e-05
A8IKE1;I1KHJ4	Alanine aminotransferase 1	AlaAT1	30.3405	30.0871	30.2601	30.275	30.3282	30.4673	30.875	30.519	30.7753	31.1891	30.8551	31.2555	30.7792	30.9486	31.2334	31.1994	31.1172	31.2105	31.4556	31.1579	31.1403	31.3056	30.922	biosynthetic process;metabolic process	binding;catalytic activity;cofactor binding;pyridoxal phosphate binding;transaminase activity;transferase activity;transferase activity, transferring nitrogenous groups;vitamin B6 binding;vitamin binding		+	21	21	6	50	50	15.4	53.32	0	323.31	41681000000	394	5.69956	8.17341e-05
O23961	Peroxidase (EC 1.11.1.7)	GMIPER1	29.897	30.5774	30.3891	31.5279	31.7936	30.8056	32.0812	32.228	31.2044	31.4268	32.2295	32.2669	33.7761	32.9824	32.8977	33.4548	32.698	32.8188	33.1359	32.9901	33.0643	33.0361	33.1195	response to chemical stimulus;response to oxidative stress;response to stimulus;response to stress	antioxidant activity;binding;catalytic activity;cation binding;heme binding;ion binding;iron ion binding;metal ion binding;oxidoreductase activity;oxidoreductase activity, acting on peroxide as acceptor;peroxidase activity;tetrapyrrole binding;transition metal ion binding		+	17	17	0	49.7	49.7	0	38.625	0	323.31	132290000000	394	5.69275	8.17341e-05
I1MFN6;C6TC96;K7LUU3	Uncharacterized protein	100814402 GLYMA_15G115000	29.0497	28.8679	29.5053	28.8463	27.8309	27.7784	27.0177	27.2363	27.2189	26.958	27.276	27.6284	26.6701	26.9076	26.5023	26.4129	26.8884	27.2678	27.2776	27.0975	27.116	27.6457	27.5534				+	8	6	6	66.5	56.9	56.9	17.869	0	147.95	4573700000	85	5.65701	8.69687e-05
I1N520;K7MVA9	Chalcone reductase	100820161 GmCHR5 GLYMA_18G285800	27.813	26.974	27.6905	28.3441	28.0707	27.3094	29.4396	28.99	29.318	29.5637	29.3831	29.7348	29.1693	29.3088	29.7668	29.6083	29.1352	29.4849	29.5733	29.8211	29.2241	29.5905	29.8856		catalytic activity;oxidoreductase activity		+	11	11	11	42.2	42.2	42.2	35.136	0	323.31	12962000000	176	5.62876	9.09955e-05
I1M7S3;I1M7S4	Clathrin heavy chain	100786715 GLYMA_14G058300	32.2893	32.1652	32.005	32.014	32.0883	32.0815	32.0622	32.0288	31.8652	31.9188	31.8678	31.99	31.8188	31.7449	31.624	31.7466	31.5921	31.6261	31.665	31.6152	31.634	31.7401	31.6299	cellular process;establishment of localization;establishment of localization in cell;establishment of protein localization;intracellular protein transport;intracellular transport;protein transport;transport;vesicle-mediated transport	structural molecule activity	cell part;clathrin coat;clathrin coat of coated pit;clathrin coat of trans-Golgi network vesicle;clathrin vesicle coat;cytoplasmic part;cytoplasmic vesicle part;Golgi apparatus part;intracellular organelle part;intracellular part;macromolecular complex;membrane coat;membrane part;organelle part;plasma membrane part;protein complex;vesicle coat	+	62	62	1	39.4	39.4	0.8	192.57	0	323.31	83124000000	695	5.54457	0.000108337
C6TER4;I1MMK6	Uncharacterized protein	100786578 GLYMA_16G103900	27.7493	27.6254	27.6255	28.467	28.5445	27.9522	29.4832	29.0786	29.2938	28.9219	28.6084	29.0519	28.8836	28.7349	28.7432	28.9511	28.4832	28.7195	29.0537	28.88	28.681	28.7494	28.7892				+	8	8	8	28.8	28.8	28.8	34.921	0	58.847	9264500000	75	5.45679	0.000130102
I1M587;C6TK83	Uncharacterized protein	100776582 GLYMA_13G346700				24.6481	25.7952	25.2902	26.2208	27.2013	27.0265	28.4375	28.4538	28.1378	27.8017	26.2678	27.606	27.8458	27.8981	28.7109	29.0969	28.5447	28.4586	28.7058	28.913	amine metabolic process;aminoglycan catabolic process;aminoglycan metabolic process;carbohydrate catabolic process;carbohydrate metabolic process;catabolic process;cell wall macromolecule catabolic process;cell wall macromolecule metabolic process;chitin catabolic process;chitin metabolic process;macromolecule catabolic process;macromolecule metabolic process;metabolic process;nitrogen compound m…	binding;carbohydrate binding;catalytic activity;chitin binding;chitinase activity;hydrolase activity;hydrolase activity, acting on glycosyl bonds;hydrolase activity, hydrolyzing O-glycosyl compounds;pattern binding;polysaccharide binding		+	4	4	3	20.1	20.1	15.7	29.829	0	323.31	4440300000	52	5.42799	0.000136446
Q9FQE8;C6T372;C6SWC9;Q2TUV6;O04874;C6ZQJ7;C6T2R8;O49235;I1MJ34	Glutathione S-transferase (Glutathione S-transferase GST 10) (EC 2.5.1.18) (Tau class glutathione S-transferase)	GST 547580 GSTU41 GLYMA_08G175200				27.2571	27.3284	26.6299	28.1958	28.3833	28.775	28.9378	28.8302	28.6241	28.4939	28.8254	28.6085	28.7142	28.8054	29.9742	29.7218	29.2341	28.8237	28.2809	28.6411		catalytic activity;glutathione transferase activity;transferase activity;transferase activity, transferring alkyl or aryl (other than methyl) groups		+	5	5	5	25.1	25.1	25.1	25.578	0	323.31	8141100000	40	5.37217	0.000152339
C6TB83;A0A0R0I2M6	Peroxidase (EC 1.11.1.7)	Ep;SPOD4.1	29.9131	30.7525	30.7671	31.3698	31.4691	31.0634	31.1566	31.5509	31.7178	31.0402	31.7585	31.4961	32.5361	32.2137	31.9692	32.6081	32.3506	32.1396	32.1539	32.0996	32.5352	32.6754	32.4407	response to chemical stimulus;response to oxidative stress;response to stimulus;response to stress	antioxidant activity;binding;catalytic activity;cation binding;heme binding;ion binding;iron ion binding;metal ion binding;oxidoreductase activity;oxidoreductase activity, acting on peroxide as acceptor;peroxidase activity;tetrapyrrole binding;transition metal ion binding		+	17	5	3	50.7	17.5	11.8	38.575	0	19.026	81680000000	55	5.31584	0.000170339
A0A0R0ETX2	Uncharacterized protein	GLYMA_19G259300	31.7711	32.2902	31.7222	32.2987	32.5282	32.2352	32.2306	32.8727	32.7843	32.0871	32.7401	32.4415	33.5804	33.5699	33.6611	33.6537	34.1718	32.833	32.7084	33.0485	33.3246	32.8778	33.2997		binding;catalytic activity;coenzyme binding;cofactor binding;D-arabinono-1,4-lactone oxidase activity;flavin adenine dinucleotide binding;oxidoreductase activity;oxidoreductase activity, acting on CH-OH group of donors;oxidoreductase activity, acting on the CH-OH group of donors, NAD or NADP as acceptor;oxidoreductase activity, acting on the CH-OH group of donors, oxygen as acceptor;UDP-N-acetylm…	cell part;membrane	+	28	28	10	57.2	57.2	28.5	64.889	0	323.31	177650000000	1051	5.26965	0.000183167
I1KFH2	Uncharacterized protein	100803331 GLYMA_06G308800	27.3593	26.9307	27.6132	28.0612	27.995	27.7205	28.9046	28.3032	28.3528	28.5968	28.5745	28.7852	28.8444	28.5949	28.7564	28.86	28.7353	28.4966	28.542	28.8538	28.5323	28.792	28.8968	biosynthetic process;metabolic process	amine-lyase activity;carbon-nitrogen lyase activity;catalytic activity;lyase activity;strictosidine synthase activity		+	13	13	13	38.8	38.8	38.8	49.553	0	216.1	7711800000	189	5.26907	0.000183167
I1KSL6;I1K467	T-complex protein 1 subunit alpha	100818130 GLYMA_08G123100	27.412	27.4436	27.4563	27.1864	27.1113	27.0582	27.1888	27.1786	27.3626	26.8826	26.9064	27.1149	26.9237	26.6484	26.5479	26.8419	26.8126	26.3131	26.8021	26.4151	26.5823	26.48	26.6148	cellular macromolecule metabolic process;cellular metabolic process;cellular process;cellular protein metabolic process;macromolecule metabolic process;metabolic process;primary metabolic process;protein folding;protein metabolic process	adenyl nucleotide binding;adenyl ribonucleotide binding;ATP binding;binding;nucleotide binding;purine nucleotide binding;purine ribonucleoside triphosphate binding;purine ribonucleotide binding;ribonucleotide binding	cell part;cytoplasm;intracellular part	+	8	8	8	15.2	15.2	15.2	59.093	0	15.5	2661500000	41	5.26038	0.000183702
I1MKD9	Uncharacterized protein	100799814 GLYMA_16G019900	24.8361	25.9666	25.7382	25.6308	26.1266	25.7784	26.9138	27.1645	27.0166	28.7437	28.3555	27.518	28.2076	27.6647	28.3599	27.8232	27.5921	28.6332	28.558	28.5555	28.2414	27.1283	28.8468		binding;catalytic activity;coenzyme binding;cofactor binding;D-arabinono-1,4-lactone oxidase activity;flavin adenine dinucleotide binding;oxidoreductase activity;oxidoreductase activity, acting on CH-OH group of donors;oxidoreductase activity, acting on the CH-OH group of donors, NAD or NADP as acceptor;oxidoreductase activity, acting on the CH-OH group of donors, oxygen as acceptor;UDP-N-acetylm…	cell part;membrane	+	13	11	9	30.8	28.4	22.2	64.672	0	285.2	5803900000	97	5.18735	0.000210218
K7K5S3;I1L7F3	Uncharacterized protein	100817659 GLYMA_02G004100	30.103	29.8724	29.8434	29.9563	29.7366	29.6058	29.3755	29.374	29.2918	29.4659	29.2736	29.5967	29.0035	29.1659	28.9902	29.0712	29.2541	28.9196	29.1307	29.0634	29.1601	29.3802	29.4828	biosynthetic process;cellular biosynthetic process;cellular macromolecule biosynthetic process;cellular macromolecule metabolic process;cellular metabolic process;cellular process;cellular protein metabolic process;macromolecule biosynthetic process;macromolecule metabolic process;metabolic process;primary metabolic process;protein metabolic process;translation	structural constituent of ribosome;structural molecule activity	cell part;cytoplasmic part;intracellular non-membrane-bounded organelle;intracellular organelle;intracellular part;macromolecular complex;non-membrane-bounded organelle;organelle;ribonucleoprotein complex;ribosome	+	5	5	1	28.6	28.6	6.9	20.312	0	12.462	16024000000	80	5.19003	0.000210218
I1L1A4;A0A0R0IAH0	Plasma membrane ATPase (EC 7.1.2.1)	100806580 GLYMA_09G056300	30.4323	30.5797	30.5081	30.657	30.5253	30.6962	30.3527	30.1081	30.0328	29.4115	29.7674	29.7037	30.0581	30.0936	29.6773	30.1633	29.6156	29.7326	29.7742	29.9193	29.8032	29.5658	29.7587	ATP biosynthetic process;ATP metabolic process;biosynthetic process;cellular biosynthetic process;cellular metabolic process;cellular nitrogen compound biosynthetic process;cellular nitrogen compound metabolic process;cellular process;heterocycle biosynthetic process;heterocycle metabolic process;metabolic process;nitrogen compound metabolic process;nucleobase-containing compound biosynthetic pro…	adenyl nucleotide binding;adenyl ribonucleotide binding;ATP binding;ATPase activity;binding;catalytic activity;cation binding;hydrolase activity;hydrolase activity, acting on acid anhydrides;hydrolase activity, acting on acid anhydrides, in phosphorus-containing anhydrides;ion binding;metal ion binding;nucleoside-triphosphatase activity;nucleotide binding;purine nucleotide binding;purine ribonucl…	cell part;integral to membrane;intrinsic to membrane;membrane part	+	33	33	2	37.5	37.5	2.5	105.06	0	298.76	23612000000	292	5.17973	0.000210487
C6SYE7	Uncharacterized protein	100306201 GLYMA_15G217100	28.7639	28.3156	28.8423	28.8277	28.8648	27.7956	27.6801	26.9825	27.3042	26.0317	26.5059	26.4809	27.2594	26.681	26.9343	27.4724	26.299	26.0866	25.0076	25.7658	25.7483	26.4543	26.6338	defense response;response to biotic stimulus;response to stimulus;response to stress			+	8	7	5	57.9	53.3	38.2	17.563	0	49.951	4022300000	56	5.1552	0.000213043
I1KWA0;I1KWA1	Uncharacterized protein	100806382 GLYMA_08G239900	29.6141	29.3628	29.7914	29.374	29.4223	29.8212	28.9848	29.4116	28.9948	28.4418	28.7063	28.3014	28.4504	28.6447	28.5225	28.8022	28.5962	28.5007	28.2112	28.4038	28.2442	27.5064	28.2985	establishment of localization;transport		cell part;integral to membrane;intrinsic to membrane;membrane part	+	35	21	21	53.8	42.4	42.4	65.208	0	323.31	10409000000	257	5.15397	0.000213043
I1MBN8	Uncharacterized protein	100781584 GLYMA_14G207700	29.2991	28.94	29.0994	29.4578	29.2941	29.3904	29.7258	29.5515	29.7261	29.4325	29.5894	29.6349	29.8241	29.7222	29.8483	29.733	29.9491	30.0154	29.96	29.8634	29.9883	29.8471	29.6539		binding;catalytic activity;cation binding;coenzyme binding;cofactor binding;ion binding;magnesium ion binding;metal ion binding;thiamine pyrophosphate binding;vitamin binding		+	18	18	5	38.5	38.5	10.4	60.666	0	188.26	17767000000	241	5.15467	0.000213043
Q9XFI8;I1MP38;C6TAQ5	Peroxidase (EC 1.11.1.7) (Fragment)	Prx4	28.4117	29.0069	28.2856	29.041	29.8245	28.7066	29.7541	29.9276	30.5359	30.4181	30.5578	30.1886	30.6477	30.5861	30.9287	30.995	30.6943	31.073	30.3857	30.8121	30.9338	30.2093	30.9304	response to chemical stimulus;response to oxidative stress;response to stimulus;response to stress	antioxidant activity;binding;catalytic activity;cation binding;heme binding;ion binding;iron ion binding;metal ion binding;oxidoreductase activity;oxidoreductase activity, acting on peroxide as acceptor;peroxidase activity;tetrapyrrole binding;transition metal ion binding		+	13	13	13	45.9	45.9	45.9	37.614	0	323.31	27069000000	239	5.08745	0.000244542
I1JUS6;C6THE3;I1K999	Aspartate aminotransferase (EC 2.6.1.1)	GLYMA_04G080700	30.8821	31.0727	30.7394	31.0041	31.036	31.0335	31.4201	31.4091	31.3859	31.585	31.4812	31.688	31.2488	30.9999	31.3794	31.3272	31.3512	31.6472	31.3672	31.4633	31.3533	31.5272	31.3749	amine metabolic process;biosynthetic process;carboxylic acid metabolic process;cellular amine metabolic process;cellular amino acid metabolic process;cellular ketone metabolic process;cellular metabolic process;cellular nitrogen compound metabolic process;cellular process;metabolic process;nitrogen compound metabolic process;organic acid metabolic process;oxoacid metabolic process;primary metabol…	binding;catalytic activity;cofactor binding;L-aspartate:2-oxoglutarate aminotransferase activity;L-phenylalanine aminotransferase activity;L-phenylalanine:2-oxoglutarate aminotransferase activity;pyridoxal phosphate binding;transaminase activity;transferase activity;transferase activity, transferring nitrogenous groups;vitamin B6 binding;vitamin binding		+	17	17	5	42.8	42.8	12.5	45.308	0	145.98	55810000000	228	5.06731	0.000252328
C6SZE4;A0A0R0G3Y8;I1ME62	4-hydroxy-4-methyl-2-oxoglutarate aldolase (HMG aldolase) (EC 4.1.1.112) (EC 4.1.3.17) (Oxaloacetate decarboxylase)		27.984	28.1351	27.9148	28.4679	28.4422	28.7921	29.009	28.8794	28.7881	29.1079	28.9521	28.778	28.5965	28.6213	28.9979	28.632	28.7881	29.3008	29.2606	29.1164	28.9303	29.3125	28.8203	biological regulation;regulation of biological process;regulation of cellular metabolic process;regulation of cellular process;regulation of macromolecule metabolic process;regulation of metabolic process;regulation of nitrogen compound metabolic process;regulation of nucleobase-containing compound metabolic process;regulation of primary metabolic process;regulation of RNA metabolic process	4-hydroxy-4-methyl-2-oxoglutarate aldolase activity;binding;carbon-carbon lyase activity;carboxy-lyase activity;catalytic activity;cation binding;enzyme inhibitor activity;enzyme regulator activity;ion binding;lyase activity;metal ion binding;oxaloacetate decarboxylase activity;oxo-acid-lyase activity;ribonuclease inhibitor activity		+	7	7	2	54.8	54.8	21.1	17.754	0	224.31	9664400000	75	5.05904	0.000253398
I1MYI8;C6TN36;K7MPA8	Glyceraldehyde-3-phosphate dehydrogenase (EC 1.2.1.-)	100782924 GLYMA_18G009700	29.1326	28.4093	28.1444	28.6382	29.5292	29.083	29.9124	29.3122	28.684	30.1178	30.2501	30.6177	30.9822	30.3587	30.7704	30.6163	29.9534	30.8786	30.9786	30.631	30.8381	31.2078	31.2216	alcohol metabolic process;carbohydrate metabolic process;cellular carbohydrate metabolic process;cellular metabolic process;cellular process;glucose metabolic process;hexose metabolic process;metabolic process;monosaccharide metabolic process;primary metabolic process;small molecule metabolic process	binding;catalytic activity;coenzyme binding;cofactor binding;NAD binding;NADP binding;nucleotide binding;oxidoreductase activity;oxidoreductase activity, acting on the aldehyde or oxo group of donors;oxidoreductase activity, acting on the aldehyde or oxo group of donors, NAD or NADP as acceptor		+	22	14	4	71.9	46.4	10.4	36.838	0	198.84	30590000000	201	4.98537	0.000295887
A0A0R0J536	Uncharacterized protein	100813145 GLYMA_07G168500	26.0644	25.0272	25.612	25.3312	25.4709	25.6369	25.9933	26.4986	26.3925	27.4037	27.3924	26.4549	26.5101	26.4597	26.7808	26.616	26.7003	27.2811	27.3901	27.1934	27.1733	26.9425	27.4626		binding;catalytic activity;cation binding;ion binding;metal ion binding;oxidoreductase activity;oxidoreductase activity, acting on paired donors, with incorporation or reduction of molecular oxygen;oxidoreductase activity, acting on paired donors, with incorporation or reduction of molecular oxygen, 2-oxoglutarate as one donor, and incorporation of one atom each of oxygen into both donors		+	8	8	8	25.6	25.6	25.6	44.407	0	40.875	2105600000	67	4.96865	0.000299676
I1L776;C6TA74	Uncharacterized protein	GLYMA_09G281900	26.0707		25.222	25.2833	25.6288	25.1966	26.0335		26.5879	26.6991	27.1954	26.8186	26.6013	26.5091	26.233	26.2753	26.7738	27.4471	28.0076	27.4325	27.2385	27.115	27.3729		catalytic activity;methyltransferase activity;O-methyltransferase activity;transferase activity;transferase activity, transferring one-carbon groups		+	6	6	2	24.4	24.4	10.6	39.877	0	17.728	2122000000	52	4.96744	0.000299676
C6T3G7;A0A0R4J530;A0A0R0HHK4	Uncharacterized protein (Fragment)		25.062	24.7984			26.0226	25.6156	26.8476	27.6744	27.9642	28.2294	28.7712	28.1581	28.3663	27.8875	28.3944	27.8137	28.7438	28.5134	28.7007	27.7887	29.0656	28.046	29.6309				+	5	5	5	23.1	23.1	23.1	27.151	0	118.66	5285800000	42	4.92615	0.000322755
K7MWT5	Uncharacterized protein	100818208 GLYMA_19G057500	25.2431	25.479	25.4894	25.4922	25.3083	25.2444	25.779	25.8795	26.1171	26.0672	26.1063	26.5503	25.3021	25.6984	26.2095	25.9057	25.8733	27.1157	27.3603	26.3745	26.5195	27.1811	26.9096		binding;catalytic activity;coenzyme binding;cofactor binding;FMN binding;nucleotide binding;oxidoreductase activity		+	9	5	5	29	19.5	19.5	40.53	0	14.272	1462500000	23	4.92315	0.000322755
A0A0R4J3J1	Peroxidase (EC 1.11.1.7)	GLYMA_06G302600	29.1969	29.7727	29.7328	28.8127	28.5687	28.4972	27.1085	27.0043	28.3277	28.0857	26.7199	27.1298	26.351	27.4055	25.7961	26.796	26.4816	27.4825	27.4767	27.3501	26.8264	26.483	26.1363	response to chemical stimulus;response to oxidative stress;response to stimulus;response to stress	antioxidant activity;binding;catalytic activity;cation binding;heme binding;ion binding;iron ion binding;metal ion binding;oxidoreductase activity;oxidoreductase activity, acting on peroxide as acceptor;peroxidase activity;tetrapyrrole binding;transition metal ion binding		+	10	9	6	44.8	42.6	30.6	35.265	0	154.47	5340000000	79	4.89052	0.00033866
Q43453	G.max mRNA from stress-induced gene (H4)	547916 GLYMA_17G030200	32.5865	32.4996	32.9374	32.6989	32.7207	32.6059	33.0125	33.3691	33.276	33.7189	33.5171	33.0628	33.4894	33.5455	33.731	33.569	34.083	33.8284	33.9261	33.7656	33.693	33.4939	33.9866	defense response;response to biotic stimulus;response to stimulus;response to stress			+	11	10	1	79.1	71.5	12.7	16.757	0	323.31	236230000000	763	4.89459	0.00033866
C6TC18	Uncharacterized protein	100786574 GLYMA_08G092800	25.5111	24.9259	25.4092	25.0013	25.2134		25.9754	26.1392	26.4295	27.0043	26.8055	26.6737	26.1417	26.3931	25.8057	26.297	25.5657	26.7548	26.4914	26.2568	26.3385	26.7532	26.6839		binding;catalytic activity;cation binding;ion binding;metal ion binding;oxidoreductase activity;oxidoreductase activity, acting on paired donors, with incorporation or reduction of molecular oxygen;oxidoreductase activity, acting on paired donors, with incorporation or reduction of molecular oxygen, 2-oxoglutarate as one donor, and incorporation of one atom each of oxygen into both donors		+	3	3	3	6.5	6.5	6.5	40.23	0	7.5703	1771700000	33	4.84626	0.000360569
I1J6K4;I1KWV4	Uncharacterized protein	100808526 GLYMA_01G081300	28.5234	28.9092	28.6434	28.156	28.5676	28.314	27.4436	27.4235	28.2464	27.7013	26.8261	27.2842	27.1169	27.4612	27.3202	27.4468	27.2415	27.5026	27.3691	27.2822	26.9108	27.0631	26.7488	carbohydrate metabolic process;metabolic process;primary metabolic process	binding;carbohydrate binding;catalytic activity;hydrolase activity;hydrolase activity, acting on glycosyl bonds;hydrolase activity, hydrolyzing O-glycosyl compounds		+	10	10	10	13.8	13.8	13.8	102.94	0	144.59	4668700000	109	4.85598	0.000360569
I1M5T2	Phospholipase D (EC 3.1.4.4)	100784434 GLYMA_13G364900	31.8299	31.747	31.8748	31.7148	31.6083	31.6703	31.5604	31.5842	31.7174	31.5358	31.3914	31.4395	31.4972	31.4705	31.4814	31.6198	31.7045	31.0631	30.9085	31.2715	31.4054	31.0922	31.1559	alcohol metabolic process;amine metabolic process;catabolic process;cellular amine metabolic process;cellular biogenic amine metabolic process;cellular lipid metabolic process;cellular metabolic process;cellular nitrogen compound metabolic process;cellular process;ethanolamine-containing compound metabolic process;glycerolipid metabolic process;glycerophospholipid metabolic process;lipid cataboli…	binding;calcium ion binding;catalytic activity;cation binding;hydrolase activity;hydrolase activity, acting on ester bonds;ion binding;lipase activity;metal ion binding;NAPE-specific phospholipase D activity;phospholipase activity;phospholipase D activity;phosphoric diester hydrolase activity;phosphoric ester hydrolase activity	cell part;membrane	+	31	22	21	47.2	33.7	32.8	92.078	0	323.31	65680000000	448	4.84864	0.000360569
I1L3J0;C6SVH2;I1MQ65	Uncharacterized protein	GLYMA_09G151900	27.415	27.328	27.8849	27.6454	27.1823	27.7165	28.0416	27.936	27.7648	28.1933	28.3407	28.3254	28.3131	28.2366	28.0716	28.4822	27.9666	28.6354	28.6912	28.8835	28.4183	28.5486	28.6612				+	4	4	1	34.2	34.2	9.1	20.72	0	138.28	6121000000	77	4.83893	0.000362067
C6SY46	Uncharacterized protein	100306134 GLYMA_16G212400	28.8529	29.0846	28.7565	28.546	29.2177	28.416	29.1232	29.6872	29.9229	31.1902	30.7096	30.4943	30.3339	31.3746	30.5114	30.9067	30.2736	31.186	30.4476	30.487	30.6608	30.1076	30.0878		endopeptidase inhibitor activity;endopeptidase regulator activity;enzyme inhibitor activity;enzyme regulator activity;peptidase inhibitor activity;peptidase regulator activity		+	11	11	11	50.5	50.5	50.5	23.593	0	82.177	26065000000	140	4.8102	0.000377276
I1MBR7	UTP--glucose-1-phosphate uridylyltransferase (EC 2.7.7.9)	100790112 GLYMA_14G210700	30.3775	30.2064	30.5026	29.9799	29.791	29.5419	29.8493	29.7795	30.0734	29.754	29.4458	29.6576	29.7519	29.6125	29.7327	29.4211	29.5823	29.3249	29.3001	29.0688	29.3419	29.5516	29.2678	alcohol metabolic process;carbohydrate metabolic process;cellular carbohydrate metabolic process;cellular metabolic process;cellular nitrogen compound metabolic process;cellular process;glucose metabolic process;hexose metabolic process;metabolic process;monosaccharide metabolic process;nitrogen compound metabolic process;nucleobase-containing compound metabolic process;nucleotide-sugar metabolic…	catalytic activity;nucleotidyltransferase activity;transferase activity;transferase activity, transferring phosphorus-containing groups;uridylyltransferase activity;UTP:glucose-1-phosphate uridylyltransferase activity;UTP-monosaccharide-1-phosphate uridylyltransferase activity		+	20	20	9	51	51	24.5	51.471	0	135.26	18736000000	186	4.8104	0.000377276
A0A0R0FMI4;A0A0R0FMH4;A0A0R0FMF4;A0A0R0FXZ0	Uncharacterized protein	100799113 GLYMA_16G071500	30.2188	30.4618	29.8345	29.8486	30.2051	30.4376	29.0336	29.2894	28.3203	29.3984	29.3878	29.0719	29.1625	28.9414	28.2687	28.381	27.7791	29.4531	28.8081	28.9836	29.446	29.1955	29.433				+	67	67	67	25.1	25.1	25.1	485.95	0	323.31	15218000000	316	4.79581	0.000385235
C6TBY0;A0A0R0KWB3	Uncharacterized protein	100797399 GLYMA_10G006200	29.9568	30.0841	29.7747	29.4489	29.4757	29.5405	29.2459	29.1213	29.1263	28.9913	28.8768	28.7749	28.6472	28.7397	29.0236	28.8826	28.4578	28.0172	28.452	29.0152	28.4947	28.6091	28.7218	cellular component biogenesis;cellular component biogenesis at cellular level;cellular component organization or biogenesis;cellular component organization or biogenesis at cellular level;cellular process;ribonucleoprotein complex biogenesis;ribosome biogenesis		cell part;intracellular part;macromolecular complex;ribonucleoprotein complex	+	10	10	3	33.5	33.5	11.5	29.636	0	24.762	11968000000	68	4.74533	0.000422412
I1K843	Uncharacterized protein	100813467 GLYMA_06G044600	29.5699	29.6831	29.589	29.3476	29.5798	29.6243	29.2566	29.4288	29.6365	28.9409	28.8389	28.8897	28.8041	29.0101	28.9551	28.9072	29.3746	29.0033	28.7569	29.0521	28.8669	28.642	28.6058				+	12	12	12	38.1	38.1	38.1	43.639	0	323.31	12885000000	139	4.74904	0.000422412
B3TDK5;P09439;Q39870;I1M596;D6PAW6;D6PAW5;Q39874	Lipoxygenase (EC 1.13.11.-)		30.6675	30.2497	29.7427	29.8613	29.6037	28.6155	29.9227	28.9987	28.9806	27.9758	27.2548	28.1148	28.1959	28.9161	28.2811	28.5485	28.1456	27.4304	28.1819	27.699	27.6786	27.4398	27.5067	biosynthetic process;carboxylic acid biosynthetic process;carboxylic acid metabolic process;cellular biosynthetic process;cellular ketone metabolic process;cellular lipid metabolic process;cellular metabolic process;cellular process;fatty acid biosynthetic process;fatty acid metabolic process;lipid biosynthetic process;lipid metabolic process;metabolic process;monocarboxylic acid metabolic proces…	binding;catalytic activity;cation binding;dioxygenase activity;ion binding;metal ion binding;oxidoreductase activity;oxidoreductase activity, acting on single donors with incorporation of molecular oxygen;oxidoreductase activity, acting on single donors with incorporation of molecular oxygen, incorporation of two atoms of oxygen	cell part;cytoplasm;intracellular part	+	9	1	1	9.9	2.1	2.1	96.725	0	7.965	10227000000	67	4.73291	0.000429558
A0A0R0IEJ6	Uncharacterized protein	106794104 GLYMA_09G281800				25.3786		25.1684	26.794	27.3282	27.3496	28.498	28.631	27.9064	27.1345	27.4883	27.8424	27.4166	26.9259	27.9827	28.2164	27.7784	27.6238	28.0985	28.5524				+	11	11	11	41.2	41.2	41.2	41.024	0	99.323	3849500000	70	4.71652	0.000440884
I1J8Y0;G3E7N0;A0A0R0LCF1;A0A0R0LJ28;A0A0R0LJC8;I1J8Y1;A0A0R0LCY5	Uncharacterized protein	GLYMA_01G177700	28.2966	27.9168	28.4408	28.5535	28.166	28.318	28.8124	28.4076	28.4221	29.3475	29.0523	28.8582	28.9493	29.092	29.117	29.1299	28.9545	29.2231	29.5594	29.4308	29.2053	29.2683	28.9278		aminopeptidase activity;binding;catalytic activity;cation binding;exopeptidase activity;hydrolase activity;ion binding;metal ion binding;peptidase activity;peptidase activity, acting on L-amino acid peptides		+	18	18	9	39.7	39.7	19.8	73.062	0	323.31	11789000000	203	4.70352	0.000449063
I1L6V4;C6T8G6;I1L6V5	Uncharacterized protein	GLYMA_09G269600	29.1744	29.1326	29.0513	29.6447	29.6455	29.0803	30.1101	30.2699	29.9156	30.2838	30.5246	30.6501	30.2613	30.5067	30.1029	30.5884	29.7588	30.4142	30.7055	30.3654	30.3454	30.7131	30.3175		binding;catalytic activity;coenzyme binding;cofactor binding		+	9	9	1	31.8	31.8	4	35.934	0	67.694	27769000000	176	4.69077	0.000452048
I1M1I0	Uncharacterized protein	100795004 GLYMA_13G220000	29.0431	29.1032	29.1238	29.1351	29.5016	29.1714	29.6875	29.437	29.3241	29.7652	29.7226	30.0214	29.5948	29.5423	29.7745	29.8031	29.8192	29.8225	30.0697	29.8469	29.47	29.6702	29.4584		active transmembrane transporter activity;adenyl nucleotide binding;adenyl ribonucleotide binding;ATP binding;ATPase activity;ATPase activity, coupled;ATPase activity, coupled to movement of substances;ATPase activity, coupled to transmembrane movement of substances;binding;catalytic activity;hydrolase activity;hydrolase activity, acting on acid anhydrides;hydrolase activity, acting on acid anhyd…	cell part;integral to membrane;intrinsic to membrane;membrane part	+	28	28	13	26.6	26.6	13.6	181.85	0	323.31	16337000000	253	4.69508	0.000452048
I1L3X9	Sucrose synthase (EC 2.4.1.13)	100805344 GLYMA_09G167000	27.3101	26.6964	26.7199	27.2725	27.388	27.3028	26.5551	26.7358	26.5381	26.3116	25.9176	26.1438	26.0038	26.5233	25.9382	26.1692	26.515	25.7291	25.8757		25.8165	26.0984	26.0329	biosynthetic process;carbohydrate metabolic process;cellular carbohydrate metabolic process;cellular metabolic process;cellular process;disaccharide metabolic process;glycoside metabolic process;metabolic process;oligosaccharide metabolic process;primary metabolic process;sucrose metabolic process	catalytic activity;glucosyltransferase activity;sucrose synthase activity;transferase activity;transferase activity, transferring glycosyl groups;transferase activity, transferring hexosyl groups;UDP-glucosyltransferase activity;UDP-glycosyltransferase activity		+	8	8	2	9.6	9.6	2.6	104.15	0	12.551	1879200000	13	4.6555	0.000480706
Q9SWR5;K9LH71;O48926;B5L5H4;B5L5G7;B5L5G6;B5L5G4;B5L5F6;B5L5H5;B5L5H2;B5L5F7;B5L5H1;Q5DP49	2-hydroxyisoflavanone synthase (EC 1.14.14.87) (Cytochrome P450 93C1v2) (Isoflavone synthase 2)	IFS2 CYP93C1v2	29.5469	29.578	29.309	30.231	30.1152	29.5337	30.9892	31.1367	31.0347	30.9123	30.9245	31.4025	31.1562	30.6023	30.72	30.5841	30.4636	30.5606	30.6096	30.4747	30.4444	31.208	30.5175	aromatic compound biosynthetic process;biosynthetic process;cellular aromatic compound metabolic process;cellular biosynthetic process;cellular metabolic process;cellular process;heterocycle metabolic process;isoflavonoid biosynthetic process;isoflavonoid metabolic process;metabolic process;phenylpropanoid biosynthetic process;phenylpropanoid metabolic process;secondary metabolic process	2-hydroxyisoflavanone synthase activity;binding;catalytic activity;cation binding;heme binding;ion binding;iron ion binding;metal ion binding;monooxygenase activity;oxidoreductase activity;oxidoreductase activity, acting on paired donors, with incorporation or reduction of molecular oxygen;oxidoreductase activity, acting on paired donors, with incorporation or reduction of molecular oxygen, NADH …	cell part;cytoplasmic part;endoplasmic reticulum membrane;endoplasmic reticulum part;integral to membrane;intracellular membrane-bounded organelle;intracellular organelle;intracellular organelle part;intracellular part;intrinsic to membrane;membrane;membrane part;membrane-bounded organelle;organelle;organelle membrane;organelle part	+	17	17	2	33.6	33.6	7.1	58.868	0	168.56	34815000000	243	4.65443	0.000480706
A5YT86;A0A0R0F392;I1L6I6;K7LG37	Cysteine synthase (EC 2.5.1.47)	OAS-TL3	24.9759		24.8433	26.0315	26.041	25.8695	27.1139	26.3011	26.6288	26.5979	27.049	27.1648	27.3894	26.8924	26.6331	27.0888	27.1129	27.0003	27.0168	26.9408	26.9804	27.5688	26.5908	amine biosynthetic process;amine metabolic process;biosynthetic process;carboxylic acid biosynthetic process;carboxylic acid metabolic process;cellular amine metabolic process;cellular amino acid biosynthetic process;cellular amino acid metabolic process;cellular biosynthetic process;cellular ketone metabolic process;cellular metabolic process;cellular nitrogen compound biosynthetic process;cellu…	carbon-oxygen lyase activity;catalytic activity;cysteine synthase activity;lyase activity;transferase activity		+	5	5	5	14.2	14.2	14.2	40.124	0	47.878	2357500000	35	4.6459	0.000484907
A0A0R0LL96	Uncharacterized protein	GLYMA_01G219000	25.463		25.5827	25.8087	26.619	26.1777	26.9981	26.9716	26.7754	26.8002	26.9684	27.0332	26.9255	26.819	26.6057	27.0371	27.0938	26.9609	27.0535	26.9053	26.8229	26.6094	26.9214	cation transport;establishment of localization;ion transport;metal ion transport;transport	active transmembrane transporter activity;adenyl nucleotide binding;adenyl ribonucleotide binding;ATP binding;ATPase activity;ATPase activity, coupled;ATPase activity, coupled to movement of substances;ATPase activity, coupled to transmembrane movement of ions;ATPase activity, coupled to transmembrane movement of substances;binding;catalytic activity;cation binding;cation transmembrane transporte…	cell part;integral to membrane;intrinsic to membrane;membrane part	+	7	7	7	9.8	9.8	9.8	93.677	0	64.602	2232600000	35	4.62487	0.000503499
I1L927;I1L925	Uncharacterized protein	GLYMA_10G061000				25.734	26.2338	26.3236	28.4479	29.3339	27.6624	32.6502	31.1962	32.3546	30.7142	28.8964	31.0135	29.4715	28.4686	30.7648	32.1336	30.7777	30.7566	30.0514	30.738				+	7	7	1	53.7	53.7	17.4	25.581	0	225.75	30181000000	173	4.61721	0.000507002
A0A0R0JPH2	Uncharacterized protein	GLYMA_05G011600	27.5622	27.2336	27.2712	26.9286	26.8564	27.4295	26.5079	26.7197	25.9981	26.0991	26.2165	26.0807	26.1438	26.3358	25.9669	26.1551	26.4127	26.0519	25.9667	26.2439	26.3394	25.8762	25.8411		adenyl nucleotide binding;adenyl ribonucleotide binding;ATP binding;binding;catalytic activity;kinase activity;nucleotide binding;phosphotransferase activity, alcohol group as acceptor;protein kinase activity;purine nucleotide binding;purine ribonucleoside triphosphate binding;purine ribonucleotide binding;ribonucleotide binding;transferase activity;transferase activity, transferring phosphorus-c…	cell part;integral to membrane;intrinsic to membrane;membrane part	+	7	7	2	12.4	12.4	3.9	69.599	0	54.474	1985300000	46	4.61063	0.000509328
I1MGE7;I1KMR0;A0A0R0JD83;I1MRQ9	Uncharacterized protein	100795745 GLYMA_15G140300	30.7938	30.7825	30.4739	30.9392	30.6825	30.668	31.2116	31.2764	31.2027	31.3105	31.3267	31.2333	31.1894	31.1456	31.3765	31.1731	31.1405	31.2623	31.3776	31.0738	31.2567	31.2499	31.328	carbohydrate metabolic process;cellular carbohydrate metabolic process;cellular metabolic process;cellular process;metabolic process;primary metabolic process	acid-thiol ligase activity;ATP citrate synthase activity;catalytic activity;CoA-ligase activity;ligase activity;ligase activity, forming carbon-sulfur bonds;succinate-CoA ligase (ADP-forming) activity;succinate-CoA ligase activity;transferase activity;transferase activity, transferring acyl groups;transferase activity, transferring acyl groups, acyl groups converted into alkyl on transfer		+	28	28	3	55.3	55.3	6.7	65.961	0	323.31	49089000000	546	4.59455	0.000523027
I1KEV4	Acyl-coenzyme A oxidase	100790627 GLYMA_06G285400	28.4255	28.3097	28.6717	28.2242	28.9235	28.7053	28.5678	28.9529	29.0883	29.266	29.2848	29.4201	29.1452	29.0884	29.0674	29.1906	29.3259	29.6585	29.5491	29.615	29.3793	29.3023	29.3851	carboxylic acid catabolic process;carboxylic acid metabolic process;catabolic process;cellular catabolic process;cellular ketone metabolic process;cellular lipid catabolic process;cellular lipid metabolic process;cellular metabolic process;cellular process;fatty acid beta-oxidation;fatty acid catabolic process;fatty acid metabolic process;fatty acid oxidation;lipid catabolic process;lipid metabol…	acyl-CoA dehydrogenase activity;acyl-CoA oxidase activity;binding;catalytic activity;coenzyme binding;cofactor binding;flavin adenine dinucleotide binding;oxidoreductase activity;oxidoreductase activity, acting on the CH-CH group of donors;oxidoreductase activity, acting on the CH-CH group of donors, oxygen as acceptor	cell part;cytoplasmic part;intracellular membrane-bounded organelle;intracellular organelle;intracellular part;membrane-bounded organelle;microbody;organelle;peroxisome	+	15	15	5	30.1	30.1	11	75.67	0	105.05	12117000000	113	4.58846	0.000524949
I1M0R6;C6SV92;I1M0R7	Uncharacterized protein	100305482 GLYMA_13G196500	26.2665			26.3155	26.1439	26.4746	27.2237	27.5505	27.7787	28.0524	27.8055	27.7038	27.1848	27.254	27.1973	27.3835	27.2388	27.4555	27.3287	27.7524	27.5922	27.2459	27.9025		catalytic activity;oxidoreductase activity		+	5	4	4	26.2	21.5	21.5	21.146	0	10.027	3213800000	24	4.53164	0.000592224
A0A0R0H8B1;C6T5L7;A0A0R0GWM0;C6T1A1	Uncharacterized protein	100500293 GLYMA_12G207600	28.2928	28.5228	28.994	27.9387	28.4579	28.1192	27.4207	27.6117	27.3104	27.4033	26.1603	26.6873	26.0536	26.9867	27.0472	26.6867	26.9744	27.0913	27.276	26.9306	26.7881	26.5442	26.9857				+	6	6	6	34.4	34.4	34.4	26.345	0	79.318	3810800000	72	4.51615	0.000607523
I1L367;I1L370;I1L368;I1L369	Uncharacterized protein	100779306 GLYMA_09G138100	27.0196	26.9388	27.9074	28.4326	27.4533	28.2792	29.2188	28.9709	29.2033	28.7481	29.3307	29.3081	29.3591	29.2932	29.2672	29.4301	29.0733	29.6534	29.3164	29.1178	28.7935	29.5973	28.8537		catalytic activity		+	11	11	8	29.5	29.5	22.2	55.703	0	135.15	10928000000	158	4.48587	0.00064488
I1KVZ9;Q9SWS4	Uncharacterized protein	GLYMA_08G230100	30.7975	30.3903	30.9767	30.1814	30.0254	30.7485	29.8181	29.1914	28.6729	28.2064	28.7847	27.4841	27.4213	28.9639	29.0545	28.6259	29.0394	27.905	28.028	28.115	28.4637	28.057	27.1346	defense response;response to biotic stimulus;response to stimulus;response to stress			+	10	9	8	82.9	77	72.4	17.619	0	173.13	14489000000	82	4.47637	0.000652489
I1L1U4;I1L1U2;I1L1U5	Sucrose synthase (EC 2.4.1.13)	100806761 GLYMA_09G073600	29.4766	29.6942	29.4586	30.2396	30.205	30.1172	30.3279	30.4581	30.7797	30.8936	30.9491	30.9646	30.3406	30.578	31.1743	30.6132	30.5346	30.6471	31.0432	30.5325	30.662	31.2661	30.7519	biosynthetic process;carbohydrate metabolic process;cellular carbohydrate metabolic process;cellular metabolic process;cellular process;disaccharide metabolic process;glycoside metabolic process;metabolic process;oligosaccharide metabolic process;primary metabolic process;sucrose metabolic process	catalytic activity;glucosyltransferase activity;sucrose synthase activity;transferase activity;transferase activity, transferring glycosyl groups;transferase activity, transferring hexosyl groups;UDP-glucosyltransferase activity;UDP-glycosyltransferase activity		+	38	26	6	45.3	31	9.9	92.784	0	126.39	34050000000	231	4.47217	0.000652489
Q93XE6;A0A0R0EFP3;C6SVP9;A0A1A9C7M4;A6XKY2;A0A1A9C8Q3;A0A1A9C8J0;O81980;A0A1A9C9D4;I1NJ68	Chalcone--flavonone isomerase 1A (Chalcone isomerase 1A) (EC 5.5.1.6)	CHI1A	29.3669	29.4475	29.7786	30.0822	30.0566	29.6431	30.9061	30.4047	30.5155	30.1599	30.327	30.2569	30.4159	30.6624	30.8192	30.5794	30.6501	30.309	30.2613	30.3007	30.1178	29.8962	30.3399	aromatic compound biosynthetic process;biosynthetic process;cellular aromatic compound metabolic process;cellular biosynthetic process;cellular metabolic process;cellular process;flavonoid biosynthetic process;flavonoid metabolic process;metabolic process;phenylpropanoid biosynthetic process;phenylpropanoid metabolic process;secondary metabolic process	catalytic activity;chalcone isomerase activity;intramolecular lyase activity;isomerase activity		+	12	12	12	61	61	61	23.265	0	98.211	26949000000	124	4.4627	0.000660398
A0A0R4J2S3	Phenylalanine ammonia-lyase (EC 4.3.1.24)	100787872 GLYMA_02G309300	26.3645		26.1048	26.1194	26.6851	26.5948	27.2955	27.3013	27.9126	27.4094	27.7514	27.4092	27.7563	27.5638	27.3911	27.535	27.8495	27.7558	27.2289	27.4466	27.6262	27.4697	27.7047				+	12	12	12	19.6	19.6	19.6	77.178	0	107.75	3366300000	103	4.43334	0.000699805
I1KW53;C4XVM5	Uncharacterized protein	GLYMA_08G235300	29.4853	27.7448	27.66	28.1182	28.1586	28.3429	29.18	30.2958	29.7764	31.3283	30.8418	30.8779	29.9399	30.415	29.878	30.0467	30.864	31.4387	30.9439	30.2253	30.4749	30.434	30.7396		endopeptidase inhibitor activity;endopeptidase regulator activity;enzyme inhibitor activity;enzyme regulator activity;peptidase inhibitor activity;peptidase regulator activity		+	9	7	7	56.2	51.4	51.4	23.367	0	222.52	25152000000	178	4.42755	0.000702442
I1K1I6	Isocitrate dehydrogenase [NADP] (EC 1.1.1.42)	100819151 GLYMA_05G005300	29.9559	30.1368	30.4323	30.5598	30.3997	30.4966	30.4939	30.5255	30.832	30.75	31.0988	30.8605	31.3313	30.9638	30.9707	30.9183	31.4951	31.3764	31.4504	31.1764	31.1708	31.5257	31.2079	acetyl-CoA catabolic process;acetyl-CoA metabolic process;carboxylic acid metabolic process;catabolic process;cellular catabolic process;cellular ketone metabolic process;cellular metabolic process;cellular process;coenzyme catabolic process;coenzyme metabolic process;cofactor catabolic process;cofactor metabolic process;isocitrate metabolic process;metabolic process;organic acid metabolic proces…	binding;catalytic activity;cation binding;coenzyme binding;cofactor binding;ion binding;isocitrate dehydrogenase (NADP+) activity;isocitrate dehydrogenase activity;magnesium ion binding;metal ion binding;NAD binding;nucleotide binding;oxidoreductase activity;oxidoreductase activity, acting on CH-OH group of donors;oxidoreductase activity, acting on the CH-OH group of donors, NAD or NADP as accept…	cell part;chloroplast part;chloroplast stroma;chloroplast thylakoid;cytoplasmic part;intracellular organelle part;intracellular part;organelle part;organelle subcompartment;plastid part;plastid stroma;plastid thylakoid;thylakoid	+	8	5	5	18.9	12.8	12.8	53.37	0	66.901	42048000000	98	4.41879	0.000705803
O81413	Ferric leghemoglobin reductase-2	547523 GLYMA_07G232900	29.555	29.4167	29.0645	29.7406	29.712	29.8589	30.4103	30.2391	29.4896	30.5037	30.6211	30.0578	30.9514	30.5798	30.5885	30.664	30.3851	30.588	30.7071	30.6855	30.6767	30.7139	30.6208	biological regulation;cell redox homeostasis;cellular homeostasis;cellular process;homeostatic process;regulation of biological process;regulation of biological quality;regulation of cellular process	binding;catalytic activity;coenzyme binding;cofactor binding;dihydrolipoyl dehydrogenase activity;flavin adenine dinucleotide binding;oxidoreductase activity;oxidoreductase activity, acting on a sulfur group of donors;oxidoreductase activity, acting on a sulfur group of donors, NAD or NADP as acceptor;oxidoreductase activity, acting on NADH or NADPH	cell part;cytoplasmic part;intracellular membrane-bounded organelle;intracellular organelle;intracellular part;membrane-bounded organelle;mitochondrion;organelle	+	18	18	3	50.2	50.2	8.2	53.001	0	236.67	30396000000	325	4.41728	0.000705803
I1JPT3	Glycosyltransferase (EC 2.4.1.-)	GLYMA_03G187700	26.3663	25.6785		26.6958	26.7783	27.3031	27.2059	27.2383	27.3021	27.3692	27.4501	27.3116	27.3429		27.0058	27.394	26.7239	27.9213	27.7716	28.0534	27.841	27.5547	28.0165		catalytic activity;transferase activity;transferase activity, transferring glycosyl groups;transferase activity, transferring hexosyl groups		+	3	3	3	9	9	9	54.707	0	13.222	3289500000	30	4.40823	0.000713995
I1KGJ0	Uncharacterized protein	100806025 GLYMA_07G015800	28.9889	29.3492	29.0222	29.2612	29.5267	29.2837	28.7738	28.4518	28.1861	28.19	28.1682	27.9974	28.307	28.3835	27.563	28.0701	28.2539	27.9844	28.1555	27.3576	27.9877	26.9682	27.6987		adenyl nucleotide binding;adenyl ribonucleotide binding;ATP binding;ATPase activity;binding;catalytic activity;hydrolase activity;hydrolase activity, acting on acid anhydrides;hydrolase activity, acting on acid anhydrides, in phosphorus-containing anhydrides;nucleoside-triphosphatase activity;nucleotide binding;purine nucleotide binding;purine ribonucleoside triphosphate binding;purine ribonucleo…	cell part;membrane	+	30	29	4	23.9	23.2	3.4	167.74	0	83.778	8018500000	113	4.37716	0.000759903
Q42797;C0LUU6;C5IWL6	Trans-cinnamate 4-monooxygenase (EC 1.14.14.91) (Cinnamic acid 4-hydroxylase) (C4H) (CA4H) (Cytochrome P450 73) (Cytochrome P450C4H)	CYP73A11	28.449	28.5969	28.7445	28.8387	28.8598	28.7759	29.4758	29.4341	29.3133	29.3765	29.3021	29.5282	29.3752	29.6752	29.4431	29.7314	29.7178	29.2262	29.39	28.9386	29.0747	29.5877	29.0937		binding;catalytic activity;cation binding;heme binding;ion binding;iron ion binding;metal ion binding;monooxygenase activity;oxidoreductase activity;oxidoreductase activity, acting on paired donors, with incorporation or reduction of molecular oxygen;oxidoreductase activity, acting on paired donors, with incorporation or reduction of molecular oxygen, NADH or NADPH as one donor, and incorporation…		+	13	13	3	32	32	8.5	58.01	0	207.22	13675000000	140	4.37302	0.000760211
Q43439;I1JI90	Phosphoinositide phospholipase C (EC 3.1.4.11)		28.5727	28.6876	28.7127	28.127	28.5737	28.3926	27.4849	28.115	27.5393	27.3634	26.923	26.7326	26.7305	27.3167	27.1756	27.0703	27.2063	27.1943	26.7886	27.0498	27.5101	26.0657	26.7208	biological regulation;catabolic process;cellular process;cellular response to stimulus;intracellular signal transduction;lipid catabolic process;lipid metabolic process;metabolic process;primary metabolic process;regulation of biological process;regulation of cellular process;response to stimulus;signal transduction	catalytic activity;hydrolase activity;hydrolase activity, acting on ester bonds;lipase activity;molecular transducer activity;phosphatidylinositol phospholipase C activity;phospholipase activity;phospholipase C activity;phosphoric diester hydrolase activity;phosphoric ester hydrolase activity;signal transducer activity		+	12	12	2	22	22	3.3	68.798	0	124.35	4352200000	62	4.35081	0.000792896
A0A0R0HYZ6;C6TEC7	Uncharacterized protein	GLYMA_10G253700				23.7661	25.4251	24.7705	25.6539	26.1288	25.8719	28.163	27.942	27.6518	27.7933	26.1028	27.1613	27.3535	27.273	27.9791	28.3834	28.1983	27.0487	27.3923	28.4663		adenyl nucleotide binding;adenyl ribonucleotide binding;ATP binding;binding;catalytic activity;kinase activity;nucleotide binding;phosphotransferase activity, alcohol group as acceptor;protein kinase activity;protein serine/threonine kinase activity;purine nucleotide binding;purine ribonucleoside triphosphate binding;purine ribonucleotide binding;ribonucleotide binding;transferase activity;transf…		+	6	6	5	19.9	19.9	16.9	28.932	0	14.881	3435800000	56	4.34158	0.000802692
I1NFG9;I1LEY1;I1JDU8;I1JDU7	Uncharacterized protein	100811658 GLYMA_20G114000	28.3382	28.3948	28.3132	28.2402	28.248	28.1924	27.8553	28.0252	27.6402	27.8368	27.5638	27.8056	27.7698	27.6431	27.3753	27.4782	27.7002	27.3181	27.4421	27.8898	27.6026	27.633	27.6491				+	10	10	7	20.7	20.7	15.2	65.503	0	34.546	4953300000	95	4.30295	0.000869227
I1LFH9;I1LFI0;I1NJA0	Uncharacterized protein	100787540 GLYMA_10G295100	27.4929	27.0178	27.1758	27.196	27.795	27.2338	26.9811	26.9564	26.652	26.393	26.5838	26.459	26.5243	26.4308	26.5961	26.4381	26.4404	26.7085	26.3444	26.483	26.2153	26.5757	26.1506	1,3-beta-D-glucan biosynthetic process;1,3-beta-D-glucan metabolic process;beta-glucan biosynthetic process;beta-glucan metabolic process;biosynthetic process;carbohydrate biosynthetic process;carbohydrate metabolic process;cellular biosynthetic process;cellular carbohydrate biosynthetic process;cellular carbohydrate metabolic process;cellular glucan metabolic process;cellular macromolecule biosy…	1,3-beta-D-glucan synthase activity;catalytic activity;glucosyltransferase activity;transferase activity;transferase activity, transferring glycosyl groups;transferase activity, transferring hexosyl groups;UDP-glucosyltransferase activity;UDP-glycosyltransferase activity	1,3-beta-D-glucan synthase complex;cell part;macromolecular complex;membrane part;plasma membrane part;protein complex	+	8	8	6	5.7	5.7	4.5	219.44	0	15.83	2429500000	25	4.29612	0.000869227
K7LNG5;C6TNS6	Uncharacterized protein	100781863 GLYMA_11G070600	29.6964	28.9434	29.4159	29.9131	30.1161	29.364	30.7698	30.4298	30.5587	30.922	30.7494	30.9675	30.9025	30.6264	30.5254	30.9004	30.019	30.7491	30.9807	31.1209	30.7482	30.8309	31.2901				+	17	17	6	63.2	63.2	23.3	35.571	0	271.13	33563000000	322	4.29552	0.000869227
I1MT10;P26413;I1JGR5	Heat shock 70 kDa protein	100782173 GLYMA_17G072400	28.5466	28.3644	28.0603	28.3074	28.3876	27.9369	28.9735	29.1296	28.2276	28.4601	28.4209	28.4793	28.5211	29.0174	28.4166	28.2088	28.0565	27.4954	27.208	26.7793	27.7325	27.2386	27.2427		adenyl nucleotide binding;adenyl ribonucleotide binding;ATP binding;binding;nucleotide binding;purine nucleotide binding;purine ribonucleoside triphosphate binding;purine ribonucleotide binding;ribonucleotide binding		+	23	11	11	34.4	17.2	17.2	70.865	0	34.681	7002900000	99	4.26235	0.000930123
A0A0R0JVM8	Uncharacterized protein	100776945 GLYMA_06G319500	27.5448	28.2907	28.0209	28.764	28.5366	28.6256	28.9465	28.5932	29.1353	28.6559	28.4065	28.399	28.3966	28.3947	29.3032	29.1657	29.5416	28.5021	28.3186	28.5159	28.9607	28.6318	28.8942				+	10	10	1	18.3	18.3	1.2	107.58	0	177.88	8559200000	98	4.23946	0.000972082
A0A0R4J3N6;K7KZP8	Uncharacterized protein	100789402 GLYMA_07G048900	26.4435	26.9226	26.1001	28.3761	29.0174	27.7464	29.8907	29.1083	29.3019	29.1309	29.5459	28.5838	29.6174	29.0075	29.3663	29.3257	28.3242	28.875	29.163	29.3708	29.0675	29.1157	28.1364		catalytic activity;methyltransferase activity;O-methyltransferase activity;transferase activity;transferase activity, transferring one-carbon groups		+	11	11	11	37.1	37.1	37.1	41.308	0	156.73	11287000000	100	4.23419	0.0009756
I1MGS2;C6TBS7	Uncharacterized protein	100786734 GLYMA_15G154700	25.7186	26.4226	26.9646	26.408	26.0646	25.6009		25.0088	25.5999			24.2616	23.8098	23.7351	24.316		23.5964	24.3504	24.068	24.6178	24.5842	24.725	24.7527	cellular process;cellular response to stimulus;response to stimulus		anchored to membrane;anchored to plasma membrane;cell part;intrinsic to membrane;intrinsic to plasma membrane;membrane part;plasma membrane part	+	4	4	1	22.5	22.5	6.9	24.269	0	10.575	695110000	26	4.23044	0.000975792
C6T397;A0A0R0HSB0	Uncharacterized protein		25.3354			25.7859	26.1977	26.2854	26.8196	28.2647	28.1255	28.588	28.8968	28.1836	28.0628	27.4806	27.3933	28.1495	28.3307	29.0393	28.7847	28.8295	29.1305	28.4006	28.9485	amine metabolic process;aminoglycan catabolic process;aminoglycan metabolic process;carbohydrate catabolic process;carbohydrate metabolic process;catabolic process;cell wall macromolecule catabolic process;cell wall macromolecule metabolic process;chitin catabolic process;chitin metabolic process;macromolecule catabolic process;macromolecule metabolic process;metabolic process;nitrogen compound m…	catalytic activity;chitinase activity;hydrolase activity;hydrolase activity, acting on glycosyl bonds;hydrolase activity, hydrolyzing O-glycosyl compounds		+	4	3	3	19.6	14.5	14.5	25.873	0	61.485	5614600000	79	4.19471	0.00105064
I1MLW9;C6TD67;C6T8Z3	Uncharacterized protein	GLYMA_16G073600	30.1439	30.3552	30.7274	30.6564	30.3669	30.3764	30.7746	30.115	30.1812	29.6721	29.7513	29.8592	30.0123	30.0428	30.1261	30.146	30.3353	29.6945	29.3659	29.5727	29.5981	29.5215	29.4978		binding;catalytic activity;cation binding;ion binding;metal ion binding;oxidoreductase activity;transition metal ion binding;zinc ion binding		+	15	15	15	63.9	63.9	63.9	34.597	0	130.74	24938000000	252	4.17514	0.00108999
I1MVN5;C6TBQ4;I1MVN7	Peroxidase (EC 1.11.1.7)	100819937 GLYMA_17G163200	29.7629	30.431	29.4394	29.4069	29.7859	29.5183	28.7251	28.5526	28.671	28.383	27.9913	28.1604	28.6955	28.3203	28.7885	28.2127	28.5282	28.8411	29.1429	28.2891	28.266	28.6219	27.9499	response to chemical stimulus;response to oxidative stress;response to stimulus;response to stress	antioxidant activity;binding;catalytic activity;cation binding;heme binding;ion binding;iron ion binding;metal ion binding;oxidoreductase activity;oxidoreductase activity, acting on peroxide as acceptor;peroxidase activity;tetrapyrrole binding;transition metal ion binding	extracellular region	+	11	11	2	43.1	43.1	8.6	35.513	0	106.66	12882000000	179	4.16633	0.00110321
I1NH45	Peroxidase (EC 1.11.1.7)	100775837 GLYMA_20G169200	27.089	27.5454	26.3861	28.2277	28.2759	27.007	28.5345	29.5049	27.7675	28.4716	28.8821	29.0705	30.5434	29.9397	29.2755	30.4618	29.3168	29.6273	29.3879	29.5624	29.7792	29.6252	30.1904	response to chemical stimulus;response to oxidative stress;response to stimulus;response to stress	antioxidant activity;binding;catalytic activity;cation binding;heme binding;ion binding;iron ion binding;metal ion binding;oxidoreductase activity;oxidoreductase activity, acting on peroxide as acceptor;peroxidase activity;tetrapyrrole binding;transition metal ion binding		+	10	10	2	38.2	38.2	11.8	38.915	0	89.241	13683000000	95	4.14946	0.00113759
A0A0R0GGN1	Uncharacterized protein	100795195 GLYMA_14G048000	27.7897	28.0742	28.524	28.3546	28.2011	27.8004	28.0618	27.5075	28.5773	27.4873	26.6553	26.8558	26.8979	27.5168	28.1181	27.9911	29.0335	26.668	26.8737	25.7789	26.1475	26.3397	26.2021				+	12	12	12	23.9	23.9	23.9	84.085	0	222.24	4320900000	77	4.12459	0.00118096
A0A0R0GP18	Uncharacterized protein	100805802 GLYMA_13G158200	28.7387	28.7666	29.027	29.0443	29.0818	28.7874	29.4529	29.5607	29.0612	29.79	29.2927	29.7213	29.3037	29.3576	29.687	29.9836	29.7909	29.3572	29.5275	29.3989	29.0844	29.0279	29.0937				+	3	3	3	14.6	14.6	14.6	34.036	0	323.31	13142000000	181	4.12058	0.00118096
I1KU18;C6TLE7	Uncharacterized protein	100808508 GLYMA_08G169800	30.5577	30.7576	31.1315	30.5856	31.1913	30.8783	29.4319	29.5037	29.6343	28.7904	29.3687	29.7356	29.8034	30.1299	29.7794	30.1881	30.5478	30.1228	29.9506	30.4153	29.886	29.917	29.6881				+	16	16	16	58.5	58.5	58.5	35.73	0	95.507	25196000000	197	4.1159	0.00118096
I1LEQ8;I1NFR3;C6TIW0;A0A0R0HCG5;I1LEQ9	Fructose-bisphosphate aldolase (EC 4.1.2.13)	100802732 GLYMA_10G268500	29.5496	29.084	29.3113	29.5237	29.2007	29.4865	29.8236	30.1039	30.3989	29.9452	30.149	29.8615	30.0729	29.9993	30.057	30.2655	30.0121	30.2138	30.0447	30.0984	30.0738	29.9673	30.216	alcohol catabolic process;alcohol metabolic process;carbohydrate catabolic process;carbohydrate metabolic process;catabolic process;cellular carbohydrate catabolic process;cellular carbohydrate metabolic process;cellular metabolic process;cellular process;generation of precursor metabolites and energy;glucose catabolic process;glucose metabolic process;glycolysis;hexose catabolic process;hexose m…	aldehyde-lyase activity;carbon-carbon lyase activity;catalytic activity;fructose-bisphosphate aldolase activity;lyase activity		+	13	13	12	40	40	37.9	42.536	0	253.81	20911000000	196	4.12574	0.00118096
I1N1M0;I1J525	ATP-dependent 6-phosphofructokinase (ATP-PFK) (Phosphofructokinase) (EC 2.7.1.11) (Phosphohexokinase)	100793883 PFK GLYMA_18G145500	27.1485	27.1607	27.1478	27.0365	27.1643	27.4361	27.8177	27.8913	27.3338	28.0377	28.2124	27.843	27.9504	27.7538	27.7762	27.7857	27.6239	28.0302	27.9159		27.9376	27.8042	27.9092	alcohol catabolic process;alcohol metabolic process;carbohydrate catabolic process;carbohydrate metabolic process;catabolic process;cellular carbohydrate catabolic process;cellular carbohydrate metabolic process;cellular metabolic process;cellular process;fructose 6-phosphate metabolic process;fructose metabolic process;generation of precursor metabolites and energy;glucose catabolic process;gluc…	6-phosphofructokinase activity;adenyl nucleotide binding;adenyl ribonucleotide binding;ATP binding;binding;carbohydrate kinase activity;catalytic activity;cation binding;ion binding;kinase activity;metal ion binding;nucleotide binding;phosphofructokinase activity;phosphotransferase activity, alcohol group as acceptor;purine nucleotide binding;purine ribonucleoside triphosphate binding;purine ribo…	cell part;cytoplasm;intracellular part	+	4	4	2	9	9	3.2	58.417	0	14.424	5139700000	32	4.11789	0.00118096
P17093;I1MU00;C6SVJ4;A0A0R0GPK2	40S ribosomal protein S11	RPS11	31.183	31.0352	30.8043	31.1578	31.0429	31.2546	30.5014	30.5604	30.5157	30.4285	30.4101	30.5745	30.6688	30.4326	30.5589	30.4484	30.1438	30.0483	30.4686	30.4495	30.6855	30.5719	30.4739	biosynthetic process;cellular biosynthetic process;cellular macromolecule biosynthetic process;cellular macromolecule metabolic process;cellular metabolic process;cellular process;cellular protein metabolic process;macromolecule biosynthetic process;macromolecule metabolic process;metabolic process;primary metabolic process;protein metabolic process;translation	binding;nucleic acid binding;RNA binding;rRNA binding;structural constituent of ribosome;structural molecule activity	cell part;cytoplasmic part;intracellular non-membrane-bounded organelle;intracellular organelle;intracellular part;macromolecular complex;non-membrane-bounded organelle;organelle;ribonucleoprotein complex;ribosome	+	11	11	5	49.7	49.7	25.8	17.833	0	52.611	35975000000	162	4.11133	0.0011842
C6T0C1	Uncharacterized protein	100306656 GLYMA_15G146600	26.1595		25.7349	26.2455	25.2831	25.7598	26.9048	26.9229	27.0697	27.3142	27.0333	27.0941	26.5502	26.871	27.1074	26.8952	26.5939	27.7068	27.9168	27.2108	26.8565	27.4213	26.8363	defense response;response to biotic stimulus;response to stimulus;response to stress			+	3	3	2	25.6	25.6	18.1	17.901	0	175.87	2457700000	26	4.10242	0.0011931
I1L4I8;Q3LFP8	Uncharacterized protein	732569 GLYMA_09G191300	27.0236	27.2551	27.4509	27.081	27.2048	27.0797	26.6794	27.1587	26.8498	26.771	26.4516	26.9737	26.1538	26.2031	26.1401	26.3934	26.5272	26.6663	26.8237	26.8173	26.4639	26.6812	26.3565		adenyl nucleotide binding;adenyl ribonucleotide binding;ATP binding;binding;catalytic activity;kinase activity;nucleotide binding;phosphotransferase activity, alcohol group as acceptor;protein kinase activity;protein serine/threonine kinase activity;purine nucleotide binding;purine ribonucleoside triphosphate binding;purine ribonucleotide binding;ribonucleotide binding;transferase activity;transf…		+	5	5	2	11.3	11.3	4.2	70.134	0	80.756	2303200000	71	4.1014	0.0011931
I1LIV5;I1LPL0	Uncharacterized protein	100791799 GLYMA_11G103500	28.8021	28.6377	28.9743	28.1535	27.9886	28.0954	27.8371	27.6759	27.8016	27.9265	27.0685	27.7674	27.4455	27.6518	27.9153	28.0064	27.7884	27.6991	27.7376	28.0155	28.0081	27.8791	27.7828		binding;catalytic activity;coenzyme binding;cofactor binding;flavin adenine dinucleotide binding;oxidoreductase activity;oxidoreductase activity, acting on CH-OH group of donors;oxidoreductase activity, acting on the CH-OH group of donors, NAD or NADP as acceptor;UDP-N-acetylmuramate dehydrogenase activity		+	7	7	7	17.8	17.8	17.8	66.021	0	22.969	5276800000	42	4.08644	0.00121634
I1MPM4;I1MPM3	Uncharacterized protein	100798235 GLYMA_16G182500	29.8145	29.5044	29.792	29.7581	29.8268	29.8463	30.0795	30.047	30.0418	30.1519	30.1419	30.1464	30.1393	30.3743	30.5936	30.2563	30.1059	30.3092	30.3928	30.2705	30.4106	30.2462	30.2508		catalytic activity;endopeptidase activity;hydrolase activity;peptidase activity;peptidase activity, acting on L-amino acid peptides;serine hydrolase activity;serine-type endopeptidase activity;serine-type peptidase activity		+	35	35	10	30.5	30.5	7.8	146.48	0	323.31	24838000000	350	4.08815	0.00121634
K7M052;I1LZS4	Uncharacterized protein	100127429 GLYMA_13G161600	27.9887	28.0594	27.7184	27.5953	27.7268	27.8443	27.1584	27.3221	27.2889	27.6786	27.6909	27.4607	26.8335	27.3536	27.0947	27.2229	27.0922	27.5306	27.4576	27.2135	27.3175	27.2782	27.1618	biosynthetic process;carbohydrate metabolic process;cellular carbohydrate metabolic process;cellular metabolic process;cellular process;disaccharide metabolic process;glycoside metabolic process;metabolic process;oligosaccharide metabolic process;primary metabolic process;sucrose metabolic process	catalytic activity;glucosyltransferase activity;sucrose-phosphate synthase activity;transferase activity;transferase activity, transferring glycosyl groups;transferase activity, transferring hexosyl groups;UDP-glucosyltransferase activity;UDP-glycosyltransferase activity		+	10	10	2	12.5	12.5	3.9	118.01	0	183.55	3761600000	67	4.05299	0.00130394
I1LI96;I1J8D7	Phosphoserine aminotransferase (EC 2.6.1.52)	100779355 GLYMA_11G084400	28.3973	28.6069	28.5605	28.9175	29.228	29.1429	29.7218	29.153	29.5753	29.3797	29.1487	29.7161	29.9057	29.594	29.8083	29.6505	29.6154	29.6861	29.7826	29.4723	29.4908	29.6589	29.1201	amine biosynthetic process;amine metabolic process;biosynthetic process;carboxylic acid biosynthetic process;carboxylic acid metabolic process;cellular amine metabolic process;cellular amino acid biosynthetic process;cellular amino acid metabolic process;cellular biosynthetic process;cellular ketone metabolic process;cellular metabolic process;cellular nitrogen compound biosynthetic process;cellu…	binding;catalytic activity;cofactor binding;O-phospho-L-serine:2-oxoglutarate aminotransferase activity;pyridoxal phosphate binding;transaminase activity;transferase activity;transferase activity, transferring nitrogenous groups;vitamin B6 binding;vitamin binding		+	13	13	9	37	37	25.7	44.997	0	131.94	14606000000	158	3.99511	0.00147879
A0A0R0HUK1	Uncharacterized protein	100818032 GLYMA_11G146500	31.3719	31.5167	31.9288	31.0558	31.0252	31.7966	30.0356	30.933	30.5366	29.7723	29.7498	28.9392	29.696	30.1267	30.3446	29.7114	30.652	29.4951	29.909	29.8397	30.2437	29.2631	29.9295				+	5	5	2	16.8	16.8	4.2	30.683	0	323.31	32567000000	125	3.9735	0.00154279
I1KKU9;A0A0R0J475	Uncharacterized protein	100814036 GLYMA_07G168900	29.9074	29.5248	29.4592	29.7584	29.8864	30.0612	30.2151	30.8119	30.6436	30.7052	31.0585	30.6107	30.5708	30.9079	30.5623	30.6837	31.1417	30.7735	30.9864	30.6639	30.8883	30.3687	30.4987	abscisic acid mediated signaling pathway;aldehyde catabolic process;biological regulation;carboxylic acid metabolic process;catabolic process;cellular aldehyde metabolic process;cellular catabolic process;cellular ketone metabolic process;cellular metabolic process;cellular process;cellular response to abscisic acid stimulus;cellular response to chemical stimulus;cellular response to endogenous s…			+	20	20	20	41.6	41.6	41.6	79.383	0	287.37	31572000000	271	3.95666	0.00159208
I1KDE7	Uncharacterized protein	100806172 GLYMA_06G220700	28.2483	28.098	27.9149	27.7701	27.9098	27.6859	27.9265	28.0003	27.9858	28.5557	28.0654	28.2582	28.0496	27.8937	28.8522	28.803	29.6121	28.1545	28.0717	27.7897	28.3221	28.3634	28.2111		electron carrier activity		+	2	2	2	19.9	19.9	19.9	20.949	0	262.22	6630400000	56	3.94904	0.00160852
A0A0R0L1G2;A0A0R0L896;A0A0R0LB64;I1JI64	Uncharacterized protein	100775766 GLYMA_02G255000	32.0822	31.7791	31.8409	31.7993	31.7883	31.9894	31.0139	31.3036	31.0312	30.6718	30.6275	30.1147	30.4478	30.8174	30.775	30.426	31.3814	30.765	30.5776	30.6819	30.8121	29.7931	30.7408		transporter activity	cell part;integral to membrane;intrinsic to membrane;membrane part	+	9	9	2	32.1	32.1	7.3	27.551	0	323.31	49354000000	372	3.93457	0.00165105
I1JL52	Dirigent protein	100785797 GLYMA_03G044900		25.9223	26.4796	26.3512	26.6711	26.7186	27.1247	28.6578	28.0706	29.8685	28.4694	28.9754	28.4159	27.4215	28.5863	27.5771	28.3509	29.1645	29.0109	29.094	28.0952	28.495	28.9968				+	4	4	3	25.7	25.7	19.4	20.891	0	323.31	7606700000	156	3.92347	0.00168169
I1M307	Uncharacterized protein	100804561 GLYMA_13G270100	31.3678	31.5651	31.8332	31.922	32.0663	31.8539	31.6192	32.6088	32.861	32.9789	32.9993	32.5644	32.8121	33.1822	33.3108	33.43	33.6594	32.9353	32.6452	32.7375	32.8831	32.4233	33.2505				+	18	18	18	37.7	37.7	37.7	48.838	0	323.31	143170000000	589	3.91601	0.00169872
I1LWE5;I1LWE6	Uncharacterized protein	100809557 GLYMA_13G069800	26.2289	26.6693	26.5113	27.1384	27.5948	27.3132	27.2791	27.0372	27.2279	27.2918	27.569	27.2208	27.2471	27.0363	27.0666	27.538	27.2068	27.4307	27.3272	27.619	27.5177	27.5245	27.7641	lipid metabolic process;metabolic process;primary metabolic process	catalytic activity;hydrolase activity		+	7	7	7	16.8	16.8	16.8	66.114	0	21.709	3313800000	36	3.90271	0.00173919
C6T551	Uncharacterized protein	100527699 GLYMA_09G118300	28.9653	28.2214	29.5565	29.2435	29.4047	28.3861	28.3678	28.0565	27.8433	26.1537	27.2494	26.4295	26.9969	28.0586	27.5684	27.2399	27.6566	26.3807	27.0224	27.3182	26.6927	26.6606		defense response;response to biotic stimulus;response to stimulus;response to stress			+	9	9	9	69.9	69.9	69.9	17.333	0	188.58	5764700000	98	3.89114	0.00177366
I1JJ78;A0A0R0G880;A0A0R0G888;I1M6T9	Uncharacterized protein	100789468 GLYMA_02G289900	25.1365		25.1468		25.2107	24.918	25.7089	25.4194	25.5258	25.576	25.6995	25.7787	25.9636	25.926	25.756	25.9227	25.578	25.8661	26.0008	25.6131	25.5792	25.6442	25.625				+	3	3	3	6.7	6.7	6.7	59.244	0	10.133	965870000	17	3.87926	0.00181018
Q9XHD6;Q0WX03;C6TDV4	Polygalacturonase inhibitor protein (Fragment)	pgip3;pgip4	27.74	27.2352	27.26	27.4237	28.4456	27.2374	27.45	28.1265	27.453	28.6443	28.4954	28.3329	29.0199	28.8164	28.7721	28.9926	28.8382	29.5119	29.1713	28.5	29.2963	28.6501	29.0793				+	7	7	7	28.4	28.4	28.4	34.188	0	42.615	7838000000	83	3.82264	0.00200939
I1KNG1;I1KNG0	Uncharacterized protein	100779619 GLYMA_07G262600	25.9027	25.5851	26.6106	26.8143	26.5207	26.1091	27.574	27.1893	26.4632	27.6356	27.5722	27.5763	27.442	27.415	27.6015	27.6198	27.4755	28.1085	27.8507	27.4049	27.2814	27.2045	27.2638	lipid metabolic process;metabolic process;primary metabolic process	aspartic-type endopeptidase activity;aspartic-type peptidase activity;catalytic activity;endopeptidase activity;hydrolase activity;peptidase activity;peptidase activity, acting on L-amino acid peptides		+	6	6	2	13.5	13.5	6.4	55.455	0	14.983	3255900000	50	3.82518	0.00200939
I1KWD8	Uncharacterized protein	100816177 GLYMA_08G244700	26.8051	26.4257		27.5306	27.2651	27.1985	27.9252	27.9618	28.076	27.9062	28.163	28.4278	28.1698	28.1605	28.3235	28.3274	28.4379	28.3179	28.4108	27.9033	27.9971	28.1275	27.0655		catalytic activity;transferase activity;transferase activity, transferring glycosyl groups;transferase activity, transferring hexosyl groups		+	8	8	8	26.8	26.8	26.8	49.846	0	97.604	5283200000	55	3.82695	0.00200939
I1LQL3	Uncharacterized protein	100787037 GLYMA_12G059300	27.6365			27.7982	27.8192	28.5503	29.0055	29.5611	29.9261	29.9282	30.0234	29.4229	29.7215	29.2144	29.6909	29.4701	29.8376	29.728	29.857	29.6624	30.0066	29.6915	30.3179		catalytic activity;oxidoreductase activity		+	9	9	4	37	37	15.1	28.477	0	323.31	14491000000	78	3.82202	0.00200939
I1NGC4	Uncharacterized protein	100301904 GLYMA_20G143900	26.9903	26.9085	27.2303	26.6179	26.9189	27.0239	27.2424	27.272	27.2925	27.5846	27.5303	27.6779	27.4481	27.6852	27.1929	27.5758	27.7627	27.8076	28.1008	27.5933	27.7359	27.6618	27.4937		catalytic activity		+	9	9	3	17.5	17.5	4.6	76.907	0	63.948	3835500000	60	3.79229	0.00213735
I1JZR8;I1JZR7;I1JZR6	Uncharacterized protein	100813821 GLYMA_05G029200	28.9929	28.4596	28.7952	28.7376	28.8553	28.3699	28.8668	28.1136	28.5663	28.3615	28.1427	28.2705	28.2158	28.0906	28.0697	27.8639	28.1594	27.8919	27.609	27.3917	27.9066	27.6523	27.6039		catalytic activity;oxidoreductase activity;oxidoreductase activity, acting on the aldehyde or oxo group of donors;oxidoreductase activity, acting on the aldehyde or oxo group of donors, NAD or NADP as acceptor		+	10	10	4	24.6	24.6	10.2	58.981	0	25.922	6673100000	48	3.78064	0.00218079
I1JHQ1	Uncharacterized protein	100778257 GLYMA_02G238800	26.8782	26.774	27.0669	27.1946	27.1884	27.401	27.3726	27.5415	27.6509	27.6855	27.8241	27.3307	27.407	27.7432	27.5006	27.4018	28.008	27.8612	28.068	28.5152	28.0732	27.9388	28.0625		binding;catalytic activity;cation binding;coenzyme binding;cofactor binding;ion binding;magnesium ion binding;metal ion binding;thiamine pyrophosphate binding;vitamin binding		+	17	4	4	36.6	8.5	8.5	60.676	0	12.592	4210200000	49	3.7743	0.00218373
I1KRB5	Uncharacterized protein	100813706 GLYMA_08G080600	27.7889	28.2026	28.4561	28.474	28.5718	29.0138	28.3684	28.2529	28.2426	28.0848	27.9692	28.0493	27.9231	28.0381	27.7889	27.913	27.6786	27.4206	27.3634	27.7331	28.0422	27.6223	27.7612		binding;catalytic activity;coenzyme binding;cofactor binding;flavin adenine dinucleotide binding;oxidoreductase activity;oxidoreductase activity, acting on CH-OH group of donors;oxidoreductase activity, acting on the CH-OH group of donors, NAD or NADP as acceptor;UDP-N-acetylmuramate dehydrogenase activity		+	12	12	2	28.1	28.1	4.7	58.862	0	78.637	5989800000	130	3.77549	0.00218373
I1K670;O22639;Q39804	Uncharacterized protein	GLYMA_05G219400	27.7778	27.5263	27.7546	27.8557	27.4328	27.8571	27.7206	27.782	27.6347	28.4245	28.1889	28.3891	28.2249	28.3586	28.3721	28.505	28.0051	28.1214	27.7753	28.0206	28.3821	28.3414	28.2146		adenyl nucleotide binding;adenyl ribonucleotide binding;ATP binding;binding;nucleotide binding;purine nucleotide binding;purine ribonucleoside triphosphate binding;purine ribonucleotide binding;ribonucleotide binding		+	31	3	2	49	8.5	6.4	73.639	0	323.31	5709200000	74	3.74978	0.00229549
I1K0L3;I1MUX7	Uncharacterized protein	100788318 GLYMA_05G056100	30.0061	29.8817	30.0194	29.5369	29.8654	29.6594	29.2682	29.1122	29.0716	29.1482	28.6829	29.185	29.0439	28.9658	28.6458	29.0479	28.9791	29.2965	29.0278	28.6462	28.7814	29.0088	28.1776		binding;catalytic activity;cation binding;copper ion binding;ion binding;metal ion binding;oxidoreductase activity;transition metal ion binding		+	12	12	12	26.5	26.5	26.5	67.145	0	261.71	13256000000	131	3.74356	0.0023135
I1MQ89;I1L3K7;K7MIR3	Enolase	100787663 GLYMA_16G204600	26.5826	25.8939	26.7637	27.5953	26.8898	26.1935	27.9721	27.3581	27.3142	27.1643	27.9567	27.931	28.1979	28.1878	28.6216	28.453	28.1559	28.3933	28.0471	28.0934	27.937	27.8868	28.0268	alcohol catabolic process;alcohol metabolic process;carbohydrate catabolic process;carbohydrate metabolic process;catabolic process;cellular carbohydrate catabolic process;cellular carbohydrate metabolic process;cellular metabolic process;cellular process;generation of precursor metabolites and energy;glucose catabolic process;glucose metabolic process;glycolysis;hexose catabolic process;hexose m…	binding;carbon-oxygen lyase activity;catalytic activity;cation binding;hydro-lyase activity;ion binding;lyase activity;magnesium ion binding;metal ion binding;phosphopyruvate hydratase activity	cell part;cytoplasmic part;cytosolic part;intracellular part;macromolecular complex;phosphopyruvate hydratase complex;protein complex	+	13	10	10	43.8	36.6	36.6	48.032	0	123.83	5167000000	126	3.73774	0.00232957
A0A0R4J5C5	Uncharacterized protein	100809416 GLYMA_16G042000	30.3748	30.1864	30.5394	30.3411	30.2973	30.6421	30.4674	30.8209	30.635	31.0002	31.2332	30.893	30.7446	30.8151	30.7745	30.8161	31.4059	31.5024	31.3186	31.2196	31.087	31.3167	31.0294				+	10	10	10	57	57	57	27.595	0	323.31	41232000000	270	3.73462	0.00233132
K7MWG8;K7LXR3	Uncharacterized protein	100796721 GLYMA_19G043200	25.9258	25.5501	25.3245	25.7641	26.4521	26.0547	26.7724	26.6362	26.7847	26.9115	26.7851	26.5006	26.9316	26.8082	26.3798	26.9963	26.772	26.3901	26.176	26.5705	26.5547	26.306	26.5466	catabolic process;cell wall macromolecule catabolic process;cell wall macromolecule metabolic process;macromolecule metabolic process;metabolic process			+	7	7	7	11.3	11.3	11.3	82.796	0	18.042	1974000000	45	3.71626	0.00241649
Q96452;C6TKV8;E9KNA8;C6T7G3;Q9M5K7;E9KNA3	14-3-3-like protein C (SGF14C)	GF14C	28.3608	28.6736	28.1542	28.6224	28.265	27.2547	27.9935	28.2148	27.978	27.5543	27.798	27.2315	27.6861	27.2156	26.7798	26.9263	26.9307	27.0892	26.8235	26.9379	27.1291	26.8815	27.2877				+	9	7	3	35.3	28.7	11.6	29.208	0	205.95	4936100000	43	3.7105	0.00242271
I1JV69;I1JV71;I1JV68;I1K9R1	Uncharacterized protein	100796544 GLYMA_04G094600	26.9297	27.0532	26.4926	26.8045	26.4855	26.5921	25.9636	25.8732	25.8579		26.4213	26.1211			25.8131	25.9884	25.628	26.0421	26.013	25.9559		26.3121	25.8883	amine biosynthetic process;amine metabolic process;arginine biosynthetic process;arginine biosynthetic process via ornithine;arginine metabolic process;biosynthetic process;carboxylic acid biosynthetic process;carboxylic acid metabolic process;cellular amine metabolic process;cellular amino acid biosynthetic process;cellular amino acid metabolic process;cellular biosynthetic process;cellular keto…	amidine-lyase activity;argininosuccinate lyase activity;carbon-nitrogen lyase activity;catalytic activity;lyase activity		+	3	3	3	8.6	8.6	8.6	37.613	0	6.5933	1407000000	15	3.70965	0.00242271
I1KR53;A0A0R0IPH2	Uncharacterized protein	100786744 GLYMA_08G074700	27.5308	27.6209	27.5136	26.1082	27.0482	27.1267	25.4902	25.4521	26.0733		25.5426		25.545	25.543	25.2524	25.2834	26.2292	25.852			25.8642	25.7325	25.9713	carbohydrate metabolic process;metabolic process;primary metabolic process	catalytic activity;hydrolase activity;hydrolase activity, acting on glycosyl bonds;hydrolase activity, hydrolyzing O-glycosyl compounds		+	5	5	5	8.8	8.8	8.8	82.564	0	56.982	1565700000	34	3.69788	0.00247369
Q1W376;A0A0R0FD94;C6T8C4;C6SZ36	Phosphomannomutase (EC 5.4.2.8) (GmPMM)		26.7287	26.4068	26.9037	26.5826	26.7229	26.7416	27.4392	26.833	26.7866	26.9755	27.2417	26.7581	27.9138	27.2026	26.6695	26.302	26.8373	27.9555	27.7309	28.1882	27.1777	27.672	27.5748	alcohol biosynthetic process;alcohol metabolic process;biosynthetic process;carbohydrate biosynthetic process;carbohydrate metabolic process;cellular biosynthetic process;cellular carbohydrate biosynthetic process;cellular carbohydrate metabolic process;cellular metabolic process;cellular nitrogen compound metabolic process;cellular process;GDP-mannose biosynthetic process;GDP-mannose metabolic p…	catalytic activity;intramolecular transferase activity;intramolecular transferase activity, phosphotransferases;isomerase activity;phosphomannomutase activity	cell part;cytoplasm;intracellular part	+	8	8	8	39.3	39.3	39.3	28.019	0	19.026	3199400000	28	3.67478	0.00259264
Q38IW8;A0A0R0HAA6;Q6GW08	Triosephosphate isomerase		31.5832	31.6049	31.8075	31.4916	31.3623	31.4744	31.5517	31.3527	31.5319	31.2759	31.3455	31.1848	31.563	31.4431	31.3847	31.4372	31.4286	31.2253	30.9727	31.204	31.3444	31.1971	31.2685	alcohol catabolic process;alcohol metabolic process;carbohydrate catabolic process;carbohydrate metabolic process;catabolic process;cellular carbohydrate catabolic process;cellular carbohydrate metabolic process;cellular metabolic process;cellular process;generation of precursor metabolites and energy;glucose catabolic process;glucose metabolic process;glycolysis;hexose catabolic process;hexose m…	catalytic activity;intramolecular oxidoreductase activity;intramolecular oxidoreductase activity, interconverting aldoses and ketoses;isomerase activity;transferase activity;transferase activity, transferring acyl groups;triose-phosphate isomerase activity		+	16	16	2	60.5	60.5	10.7	27.204	0	106.3	59377000000	350	3.67146	0.00259638
A0A0R0F139	Uncharacterized protein	100812491 GLYMA_18G177000				27.8365	27.4086		28.6987	28.7297		28.8398	28.8673	29.3816	29.035	29.199	28.5454	28.8246		29.726	29.4966	29.2209	29.1403	29.723	29.4408				+	5	5	5	22.4	22.4	22.4	39.367	0	22.393	8571000000	60	3.66681	0.00260825
C6T3R4;C6TMU7	60S ribosomal protein L27	100527246 GLYMA_05G132800	28.1625	28.3741	28.2802	28.0906	28.2515	27.9102	28.1591	27.8262	27.8923	27.6407	27.5584	27.6822	27.2271	27.4387	27.9404	27.4357	27.9954	27.5018	27.6925	27.2807	27.6363	27.6907	27.5492	biosynthetic process;cellular biosynthetic process;cellular macromolecule biosynthetic process;cellular macromolecule metabolic process;cellular metabolic process;cellular process;cellular protein metabolic process;macromolecule biosynthetic process;macromolecule metabolic process;metabolic process;primary metabolic process;protein metabolic process;translation	structural constituent of ribosome;structural molecule activity	cell part;cytoplasmic part;intracellular non-membrane-bounded organelle;intracellular organelle;intracellular part;macromolecular complex;non-membrane-bounded organelle;organelle;ribonucleoprotein complex;ribosome	+	6	6	1	43	43	8.1	15.659	0	12.174	5202800000	50	3.63167	0.00281085
A5Z1N7;A0A088MGH9;A0A088MTH1;I1M6Z4;I1M6Z5	4-hydroxyphenylpyruvate dioxygenase		26.0438	25.4562	25.3094	24.8974	25.703	25.6525	25.8045	27.6792	27.0942	27.5606	27.7285	26.828	26.7317	26.2835	26.958	27.0746	27.0432	27.5587	27.1419	27.5178	27.3148	27.3569	27.5773	amine metabolic process;aromatic amino acid family metabolic process;carboxylic acid metabolic process;cellular amine metabolic process;cellular amino acid metabolic process;cellular aromatic compound metabolic process;cellular ketone metabolic process;cellular metabolic process;cellular nitrogen compound metabolic process;cellular process;metabolic process;nitrogen compound metabolic process;org…	4-hydroxyphenylpyruvate dioxygenase activity;catalytic activity;dioxygenase activity;oxidoreductase activity;oxidoreductase activity, acting on single donors with incorporation of molecular oxygen;oxidoreductase activity, acting on single donors with incorporation of molecular oxygen, incorporation of two atoms of oxygen		+	8	8	8	23.7	23.7	23.7	48.246	0	42.233	2655800000	66	3.62693	0.00281986
Q6RIB7;I1NAI7	Enolase (EC 2.3.1.16)		31.8513	31.8165	31.9526	31.7078	31.6442	31.6107	32.0213	31.6732	31.9414	31.7957	31.948	32.0062	32.0743	32.2388	32.1649	32.2673	32.2435	32.0117	32.2322	31.9974	32.1347	32.0193	32.0269	alcohol catabolic process;alcohol metabolic process;carbohydrate catabolic process;carbohydrate metabolic process;catabolic process;cellular carbohydrate catabolic process;cellular carbohydrate metabolic process;cellular metabolic process;cellular process;generation of precursor metabolites and energy;glucose catabolic process;glucose metabolic process;glycolysis;hexose catabolic process;hexose m…	acetyl-CoA C-acyltransferase activity;binding;C-acyltransferase activity;carbon-oxygen lyase activity;catalytic activity;cation binding;hydro-lyase activity;ion binding;lyase activity;magnesium ion binding;metal ion binding;phosphopyruvate hydratase activity;transferase activity;transferase activity, transferring acyl groups;transferase activity, transferring acyl groups other than amino-acyl gro…	cell part;cytoplasmic part;cytosolic part;intracellular part;macromolecular complex;phosphopyruvate hydratase complex;protein complex	+	22	22	7	56.1	56.1	20.3	47.719	0	323.31	89575000000	1089	3.62501	0.00281986
K7MVB9	Uncharacterized protein	100781680 GLYMA_18G287400	31.3856	31.2906	30.9535	31.562	31.8461	31.643	31.8242	31.6665	31.6751	31.7485	31.7476	31.8904	32.0285	31.8209	31.7655	31.9164	31.7204	31.8471	31.7853	31.718	31.8232	31.7683	31.844	acetyl-CoA catabolic process;acetyl-CoA metabolic process;catabolic process;cellular catabolic process;cellular metabolic process;cellular process;coenzyme catabolic process;coenzyme metabolic process;cofactor catabolic process;cofactor metabolic process;metabolic process;tricarboxylic acid cycle	binding;catalytic activity;coenzyme binding;cofactor binding;oxidoreductase activity;oxidoreductase activity, acting on the aldehyde or oxo group of donors;oxidoreductase activity, acting on the aldehyde or oxo group of donors, disulfide as acceptor;oxoglutarate dehydrogenase (succinyl-transferring) activity;thiamine pyrophosphate binding;vitamin binding		+	42	42	9	49.8	49.8	9.4	116.12	0	323.31	78848000000	758	3.61931	0.00284003
F6KBT3;C6TNT7	Allene oxide cyclase 3 (EC 5.3.99.6)	AOC3 100795498 GLYMA_19G044900	29.6958	29.4684	29.5871	29.7806	29.4421	29.3547	29.4052	29.2263	29.0256	28.6895	28.6343	28.0988	28.806	29.3486	29.1593	29.196	29.172	28.7478	28.5908	27.9023	28.8139	28.7033	28.3726		allene-oxide cyclase activity;catalytic activity;cyclase activity;intramolecular oxidoreductase activity;isomerase activity	cell part;chloroplast;cytoplasmic part;intracellular membrane-bounded organelle;intracellular organelle;intracellular part;membrane-bounded organelle;organelle;plastid	+	6	6	2	25.3	25.3	9.3	27.989	0	63.614	11509000000	106	3.61209	0.00287042
C6SZX0	Uncharacterized protein	100500058 GLYMA_12G095800	25.6678	25.8846	26.1184	25.7149	26.3313	25.9244	25.99	25.7503	25.9725	26.1585	26.0948	26.0586	26.6579	26.496	26.7637	26.6879	26.4035	26.5747	26.5585	26.5693	26.5858		26.3909				+	2	2	2	29.9	29.9	29.9	17.237	0	47.254	1651200000	38	3.60322	0.00291233
I1KP02	Uncharacterized protein	100788197 GLYMA_08G005200	26.0888	26.1489	26.222	25.9531		25.9287	24.9063	24.6606		24.4819			24.2167												transporter activity	cell part;integral to membrane;intracellular;intrinsic to membrane;membrane part	+	6	4	3	11.5	8.5	7.3	65.322	0	20.595	443520000	17	3.5884	0.00299571
C6TIQ5	Uncharacterized protein	100809668 GLYMA_03G097600	30.6338	30.5989	30.7981	30.7263	30.8307	30.8676	30.9108	30.5283	30.673	30.0478	30.0698	29.9203	30.5139	30.2308	30.65	30.2476	30.3349	30.248	30.0917	30.1649	29.9749	29.7571	30.4218		binding;catalytic activity;cation binding;ion binding;metal ion binding;oxidoreductase activity;transition metal ion binding;zinc ion binding		+	15	15	11	46.1	46.1	34.4	37.92	0	71.235	30993000000	234	3.57995	0.00303669
D6C4Z9	HSP90-1	100194423 GLYMA_18G074100	32.1011	32.2052	32.2456	32.3224	32.0919	32.0114	32.2354	32.1028	32.1393	31.7476	31.8482	31.5986	32.0468	32.1282	31.9225	31.9209	31.4063	31.6224	31.5048	31.527	31.7488	31.4975	31.7746	cellular macromolecule metabolic process;cellular metabolic process;cellular process;cellular protein metabolic process;macromolecule metabolic process;metabolic process;primary metabolic process;protein folding;protein metabolic process;response to stimulus;response to stress	adenyl nucleotide binding;adenyl ribonucleotide binding;ATP binding;binding;nucleotide binding;purine nucleotide binding;purine ribonucleoside triphosphate binding;purine ribonucleotide binding;ribonucleotide binding		+	37	37	4	48.6	48.6	7.8	80.379	0	293.12	85569000000	485	3.56782	0.00310458
I1KXZ9;A0A0R0J3C7	Uncharacterized protein	100811550 GLYMA_08G307800	26.9696	26.4693		27.1628	26.8844	27.1621	28.1529	27.867	28.3813	27.448	27.7951	27.5931	27.6691	27.5526	27.5003	27.6946	27.8125	27.1173	27.1121		27.1334	27.4995	27.8009				+	6	6	2	15.8	15.8	4.9	43.182	0	13.565	3741000000	32	3.55975	0.00314452
I1KNE0;I1KNE1;C6TBI1;I1KNE3;I1KND9	Lactoylglutathione lyase	100793089 GLYMA_07G261400	27.3548	27.859	27.8457	27.6448	27.4971	27.1456	27.5366	26.6921	26.8602	26.512	26.4729	26.7099	27.1931	26.85	26.8649	26.7445	26.5572	26.5748	27.0864	26.4811	26.2627	26.4532	26.275		binding;carbon-sulfur lyase activity;catalytic activity;cation binding;ion binding;lactoylglutathione lyase activity;lyase activity;metal ion binding		+	8	7	5	33	28.8	22.7	29.801	0	37.472	2747500000	50	3.54815	0.00321104
I1LL16;I1LL15;A0A0R0HJB4	Uncharacterized protein	100808944 GLYMA_11G194500	25.5492		25.5337		24.9376		25.2413	25.4689	26.2708	27.5254	26.6313	27.1285	27.028	26.2613	25.8747	25.9998	26.4477	27.5938	27.3639	27.5094	27.0899	26.6893	27.3259		catalytic activity		+	8	8	8	20.1	20.1	20.1	59.462	0	49.871	1960000000	31	3.53674	0.00327769
I1MUV7;I1MUV6	Uncharacterized protein	100794202 GLYMA_17G136200	26.7655	27.0683	26.8713	26.3461	26.389	26.6063	26.3868	26.524	26.0866	26.056	26.0079	25.5574	26.3366	25.6835	25.8206	25.6148	25.8984	25.9143	25.553	26.0473	26.1385	25.7262	25.7916		binding;DNA binding;nucleic acid binding		+	4	4	1	17.4	17.4	5.8	33.563	0	11.974	1666500000	72	3.52515	0.00334723
I1KI61;I1KI60;K7MF03;I1MKT0	Uncharacterized protein	100818998 GLYMA_07G067000	26.1531	25.9956	26.4288	26.3418	25.8485	26.9767		26.2157	26.5511	26.6607	26.8995	27.0675	27.0818	27.1621	26.9315	27.3307	26.9306	27.587	27.6009	27.487	27.3585	27.1465	27.146	carbohydrate metabolic process;cell wall organization;cell wall organization or biogenesis;cellular component organization or biogenesis;metabolic process;primary metabolic process	catalytic activity;hydrolase activity;hydrolase activity, acting on glycosyl bonds;hydrolase activity, hydrolyzing O-glycosyl compounds;polygalacturonase activity	extracellular region	+	1	1	1	3	3	3	52.099	0	36.547	2513100000	20	3.51951	0.00337182
I1MCJ7	Uncharacterized protein	100787814 GLYMA_15G011900	31.1672	30.986	30.5901	31.2675	31.6386	31.4413	31.4942	31.8969	31.6438	31.843	31.688	31.8383	31.5522	31.3033	31.4082	31.4492	31.5464	31.8321	31.6674	31.5447	31.6797	31.7675	31.8054		adenyl nucleotide binding;adenyl ribonucleotide binding;ATP binding;ATPase activity;binding;catalytic activity;hydrolase activity;hydrolase activity, acting on acid anhydrides;hydrolase activity, acting on acid anhydrides, in phosphorus-containing anhydrides;nucleoside-triphosphatase activity;nucleotide binding;purine nucleotide binding;purine ribonucleoside triphosphate binding;purine ribonucleo…	cell part;membrane	+	37	37	7	28.6	28.6	5.6	160.71	0	323.31	66881000000	463	3.47872	0.00368308
A0A0R0JBY6;B0M199;I1MRK1	Uncharacterized protein	100777319 GLYMA_07G246300	28.243	28.23	28.4351	28.0849	28.3491	28.3855	28.2679	28.4	29.1355	28.7489	28.6728	29.0587	28.7865	28.6113	28.4916	28.7658	29.0271	29.3047	29.3645	29.0836	29.2511	29.3857	29.359	carboxylic acid metabolic process;cellular ketone metabolic process;cellular lipid metabolic process;cellular metabolic process;cellular process;fatty acid metabolic process;lipid metabolic process;metabolic process;monocarboxylic acid metabolic process;organic acid metabolic process;oxoacid metabolic process;primary metabolic process;small molecule metabolic process	3-hydroxyacyl-CoA dehydrogenase activity;binding;catalytic activity;coenzyme binding;cofactor binding;oxidoreductase activity;oxidoreductase activity, acting on CH-OH group of donors;oxidoreductase activity, acting on the CH-OH group of donors, NAD or NADP as acceptor		+	15	15	12	22.9	22.9	19.6	78.948	0	79.697	10335000000	76	3.47475	0.00369612
Q5NUF3;A0A0R0LP27;I1LFS6	2-hydroxyisoflavanone dehydratase (EC 3.1.1.1) (EC 4.2.1.105) (Carboxylesterase HIDH)	HIDH Glyma01g45020	28.5569	28.4935	28.9943	28.6295	28.6831	28.9188	29.2003	29.3297	29.6211	29.7124	29.5095	29.1963	29.3999	29.0616	29.034	29.4277	29.3934	29.4844	29.8518	29.8768	29.365	29.8711	29.8753	aromatic compound biosynthetic process;biosynthetic process;cellular aromatic compound metabolic process;cellular biosynthetic process;cellular metabolic process;cellular process;flavonoid biosynthetic process;flavonoid metabolic process;heterocycle metabolic process;isoflavonoid biosynthetic process;isoflavonoid metabolic process;metabolic process;phenylpropanoid biosynthetic process;phenylpropa…	2-hydroxyisoflavanone dehydratase activity;carbon-oxygen lyase activity;carboxylic ester hydrolase activity;catalytic activity;hydrolase activity;hydrolase activity, acting on ester bonds;hydro-lyase activity;lyase activity		+	6	6	6	30.1	30.1	30.1	35.138	0	241.86	13601000000	104	3.46829	0.00372328
I1KYW5;C6T280	Uncharacterized protein	100500599 GLYMA_08G341300	30.2825	31.0484	29.3503	30.4803	31.2069	31.3149	30.5003	31.4359	31.4617	31.714	31.7672	31.8274	31.8774	32.2392	32.5042	32.3888	32.0446	32.157	31.9218	32.1016	32.1483	31.8099	32.2411		endopeptidase inhibitor activity;endopeptidase regulator activity;enzyme inhibitor activity;enzyme regulator activity;peptidase inhibitor activity;peptidase regulator activity		+	5	5	5	21.7	21.7	21.7	22.112	0	29.418	71658000000	98	3.46229	0.00372328
I1LVB0	Uncharacterized protein	100776726 GLYMA_12G234700	29.758	29.4014	29.1371	30.0454	30.017	28.982	30.3316	31.1982	30.6489	31.4679	31.3035	31.2376	30.7029	30.8813	30.5949	31.4569	31.2308	31.2649	30.9091	30.7151	30.92	30.367	31.505		endopeptidase inhibitor activity;endopeptidase regulator activity;enzyme inhibitor activity;enzyme regulator activity;peptidase inhibitor activity;peptidase regulator activity		+	6	5	5	35.2	30.1	30.1	21.365	0	77.661	37304000000	173	3.46197	0.00372328
I1MPF6;K7MHZ1	Uncharacterized protein	100780174 GLYMA_16G176200	27.3777	27.4015	26.874	27.6749	27.4851	27.9915	26.9338	27.1181	26.4679	26.5746	26.8038	26.8411	27.1558	26.6991	26.0572	26.515	26.2798	26.8423	27.2349	27.0641	27.0749	27.6346	27.6096				+	7	7	2	25.3	25.3	7	40.436	0	25.955	2965500000	56	3.46516	0.00372328
I1JBQ4	Uncharacterized protein	547714 GLYMA_02G021600	26.9411	26.2715	25.9236	26.2215		26.0517	27.0996	27.0937	27.2559	27.8048	27.7184	27.6306	27.3699	27.2883	27.3156	26.8743	26.9167	28.1916	27.6455	27.0601	27.3455	27.5846	27.605				+	7	7	7	28.3	28.3	28.3	41.61	0	100.35	3179200000	42	3.45149	0.0037935
I1N9X0;I1JP95;C6TG05;I1JP97;I1JP98	S-(hydroxymethyl)glutathione dehydrogenase (EC 1.1.1.284)	GLYMA_19G170100	28.9514	28.7522	28.7014	28.887	29.1089	28.8479	29.1248	28.7351	28.8734	28.7499	28.5956	28.5227	28.8218	28.7965	28.5721	28.6955	28.6712	28.3301	28.2914	27.7631	28.5322	28.2519	28.3215	alcohol metabolic process;ethanol metabolic process;ethanol oxidation;metabolic process;oxidation-reduction process;primary alcohol metabolic process;small molecule metabolic process	binding;catalytic activity;cation binding;ion binding;metal ion binding;oxidoreductase activity;oxidoreductase activity, acting on CH-OH group of donors;oxidoreductase activity, acting on the CH-OH group of donors, NAD or NADP as acceptor;S-(hydroxymethyl)glutathione dehydrogenase activity;transition metal ion binding;zinc ion binding		+	14	14	14	51.2	51.2	51.2	40.355	0	167.41	9700700000	104	3.44825	0.00380125
K7LBV1;A0A0R0IDL1	Uncharacterized protein	100790507 GLYMA_09G048700	26.0878		25.1538	24.973	25.0914	25.1065	25.6343	27.5373	27.0689	28.2422	27.6919	27.3727	26.6147	26.3884	26.0613	26.7274	27.5373	27.5463	27.5978	27.4447	27.4734	27.1469	27.7452		binding;catalytic activity;cation binding;heme binding;ion binding;iron ion binding;metal ion binding;monooxygenase activity;oxidoreductase activity;oxidoreductase activity, acting on paired donors, with incorporation or reduction of molecular oxygen;tetrapyrrole binding;transition metal ion binding		+	9	8	8	17.4	15.2	15.2	58.204	0	139.74	2609300000	49	3.4386	0.00385405
I1MSD7;I1LY26	Uncharacterized protein	100804820 GLYMA_17G051900	27.2011	26.9507	27.096	26.7452	26.4705	27.3908	26.5552	26.8689	26.6891	26.3485	26.571	26.5207	26.1186	26.4823	26.0217	26.159	25.8643	26.2149	26.1792	26.1331	26.0922	26.444	26.3374		adenyl nucleotide binding;adenyl ribonucleotide binding;ATP binding;binding;catalytic activity;hydrolase activity;hydrolase activity, acting on acid anhydrides;hydrolase activity, acting on acid anhydrides, in phosphorus-containing anhydrides;motor activity;nucleoside-triphosphatase activity;nucleotide binding;purine nucleotide binding;purine ribonucleoside triphosphate binding;purine ribonucleot…	cell part;cytoskeletal part;intracellular organelle part;intracellular part;macromolecular complex;myosin complex;organelle part;protein complex	+	9	9	9	5.9	5.9	5.9	173.09	0	26.325	2014200000	57	3.43759	0.00385405
I1MVF1;A0A0R0JTT3;I1MVE9;I1LH11;I1K2J5;I1J9J7;K7K4T9;A0A0R0LK68;K7LN05;I1MVF0;A0A0R0K0I3;I1LH12	Uncharacterized protein	100800916 GLYMA_17G155100	27.1509	27.3717	27.1655	26.7524	27.1962	26.6901	27.2858	26.9814	26.8035	26.8198	26.808	26.9166	26.646	26.5263	26.5167	26.5802	26.4433	26.6267	26.3843	26.4842	26.5586	26.6506	26.7516	cellular process;establishment of localization;establishment of localization in cell;establishment of protein localization;intracellular protein transport;intracellular transport;protein transport;transport;vesicle-mediated transport		AP-type membrane coat adaptor complex;cell part;clathrin adaptor complex;cytoplasmic part;intracellular part;macromolecular complex;membrane part;protein complex	+	4	4	4	10.3	10.3	10.3	44.92	0	8.5098	2435300000	25	3.40468	0.00413535
I1KPN3;Q9ATB8	Uncharacterized protein	547838 GLYMA_08G025700	28.0355	28.0495	28.1861	28.3092	28.0094	28.5543	28.1372	28.3482	28.4328	28.4868	28.7478	28.5883	28.5425	28.4891	28.825	28.6683	28.34	28.7995	28.833	29.004	28.8135	29.115	28.7713		adenyl nucleotide binding;adenyl ribonucleotide binding;ATP binding;binding;nucleotide binding;purine nucleotide binding;purine ribonucleoside triphosphate binding;purine ribonucleotide binding;ribonucleotide binding		+	31	5	5	48.9	10.9	10.9	73.476	0	323.31	7874000000	115	3.38249	0.00432905
I1KWM7	6-phosphogluconate dehydrogenase, decarboxylating (EC 1.1.1.44)	100796103 GLYMA_08G254500	31.0933	30.8785	30.9891	31.3804	31.0677	30.7016	31.699	31.6294	31.7547	31.4175	31.5028	31.5135	31.5697	31.5901	31.2841	31.5004	31.3482	31.3777	31.4271	31.5403	31.5133	31.6743	31.9711	alcohol catabolic process;alcohol metabolic process;carbohydrate catabolic process;carbohydrate metabolic process;catabolic process;cellular carbohydrate catabolic process;cellular carbohydrate metabolic process;cellular metabolic process;cellular nitrogen compound metabolic process;cellular process;coenzyme metabolic process;cofactor metabolic process;glucose catabolic process;glucose metabolic …	binding;catalytic activity;coenzyme binding;cofactor binding;NADP binding;nucleotide binding;oxidoreductase activity;oxidoreductase activity, acting on CH-OH group of donors;oxidoreductase activity, acting on the CH-OH group of donors, NAD or NADP as acceptor;phosphogluconate dehydrogenase (decarboxylating) activity		+	22	22	3	44.2	44.2	7.6	53.559	0	323.31	59970000000	344	3.37996	0.00433144
O48561;B0M1A4;A0A0R0K8D9;A0A0R0JAG1;I1K7D2;I1JSV3;I1K7D3;O48562;I1K7D4	Catalase-4 (EC 1.11.1.6)	CAT4	28.9093	28.6186	28.6333	28.0726	28.0653	28.6158	28.8555	29.2674	29.1533	29.3628	29.2484	29.139	28.7427	28.9353	29.1682	29.2032	29.7829	28.9435	28.9699	29.091	29.1663	28.8602	29.1971	catabolic process;cellular catabolic process;cellular metabolic process;cellular process;cellular response to chemical stimulus;cellular response to hydrogen peroxide;cellular response to oxidative stress;cellular response to reactive oxygen species;cellular response to stimulus;cellular response to stress;hydrogen peroxide catabolic process;hydrogen peroxide metabolic process;metabolic process;r…	antioxidant activity;binding;catalase activity;catalytic activity;cation binding;heme binding;ion binding;iron ion binding;metal ion binding;oxidoreductase activity;oxidoreductase activity, acting on peroxide as acceptor;peroxidase activity;tetrapyrrole binding;transition metal ion binding	cell part;cytoplasmic part;glyoxysome;intracellular membrane-bounded organelle;intracellular organelle;intracellular part;membrane-bounded organelle;microbody;organelle;peroxisome	+	15	6	6	40	19.1	19.1	56.736	0	23.2	10956000000	134	3.35865	0.00447056
C6THU9	Uncharacterized protein	100807404 GLYMA_13G307600	27.8949	28.4971	27.7283	27.3494	27.723	27.8674	26.5734	27.3148	26.9152	26.8097	27.1342	26.6513	26.8983	26.5147		26.9277	26.1789	26.3109	26.4292		26.3762		26.2426	cellular process;establishment of localization;transport;vesicle-mediated transport		cell part;membrane	+	4	4	1	13.7	13.7	4.2	34.532	0	45.843	2854700000	37	3.35718	0.00447056
K7KGX2;A0A0R0KVU5	Uncharacterized protein	100799703 GLYMA_03G248600	29.4537	29.2662	29.3108	29.4241	29.4161	29.3688	29.3308	29.049	29.4949	28.8109	28.9359	28.9747	28.6958	29.061	28.7702	28.85	29.22	29.0682	28.9318	28.6395	28.6673	28.676	28.5711				+	11	11	3	27.4	27.4	9.7	46.364	0	70.573	11617000000	139	3.36372	0.00447056
Q07CZ3	Glyceraldehyde-3-phosphate dehydrogenase (EC 1.2.1.-)		31.5336	31.8634	31.8348	31.815	31.8324	32.2334	31.9967	31.6609	31.3524	32.2254	32.211	32.2728	32.4273	32.1349	32.1157	32.2349	32.1223	32.3183	32.5712	32.3506	32.3895	32.5789	32.4419	alcohol metabolic process;carbohydrate metabolic process;cellular carbohydrate metabolic process;cellular metabolic process;cellular process;glucose metabolic process;hexose metabolic process;metabolic process;monosaccharide metabolic process;primary metabolic process;small molecule metabolic process	binding;catalytic activity;coenzyme binding;cofactor binding;NAD binding;NADP binding;nucleotide binding;oxidoreductase activity;oxidoreductase activity, acting on the aldehyde or oxo group of donors;oxidoreductase activity, acting on the aldehyde or oxo group of donors, NAD or NADP as acceptor		+	24	24	0	80.8	80.8	0	36.724	0	323.31	104190000000	954	3.36	0.00447056
A0A0R0HPZ5;C6SWY5;I1LQT0;A0A0R0HEQ3;A0A0R0H449;A0A0R0H6V3;C6SWE9;C6T1C4;A0A0R0KKD0;A0A0R0GW87;C6T571;A0A0R4J661	Histone H2B	100820177 GLYMA_11G141800	29.4996	29.911	29.7989	29.6964	29.8854	29.9446	29.0657	29.6062	29.7611	28.6102	28.7455	29.1186	28.7588	28.9463	29.3897	29.355	29.532	29.1548	29.1049	29.4182	29.337	28.7955	29.1346		binding;DNA binding;nucleic acid binding	cell part;chromosomal part;intracellular membrane-bounded organelle;intracellular organelle;intracellular organelle part;intracellular part;macromolecular complex;membrane-bounded organelle;nucleosome;nucleus;organelle;organelle part;protein-DNA complex	+	9	9	9	49.7	49.7	49.7	15.639	0	111.58	13942000000	138	3.3344	0.00468719
A0A0R4J4D6	Uncharacterized protein	100812707 GLYMA_11G140500	33.7865	33.8324	33.8959	33.941	33.9402	33.8509	34.1025	34.0811	34.0802	33.921	34.0701	33.9898	34.1805	34.1856	34.1818	34.0396	33.8268	33.8694	33.8284	33.7259	33.8275	33.7076	33.7797				+	36	36	4	55.8	55.8	4.3	71.081	0	323.31	351160000000	898	3.3286	0.00472599
A0A0R0H9T5	Peptidyl-prolyl cis-trans isomerase (PPIase) (EC 5.2.1.8)	106795232 GLYMA_12G024700	30.0321	30.5401	30.163	30.4235	30.5044	30.4102	31.02	30.5242	30.8776	31.0767	30.8513	31.2412	31.2987	31.1046	31.6916	31.1186	31.2947	31.2787	31.4465	30.8458	31.0511	30.9003	30.5672				+	9	9	7	77.9	77.9	69.2	18.126	0	323.31	51385000000	564	3.32062	0.00478915
A0A0R4J3M4;A0A0R0F259	Uncharacterized protein	100789053 GLYMA_07G153100	26.5667	26.9159	26.7792	27.2645	27.2862	27.3975	27.107	26.7009	26.9158	26.7651	27.4363	28.1135	27.0863	26.9319	28.1832	27.563	27.3514	28.2527	28.0837	28.1864	27.9779	28.1705	27.8687				+	9	8	8	18.3	16.1	16.1	65.154	0	158.92	3786200000	141	3.31788	0.00479512
I1LN02;C6TEL1	Uncharacterized protein	100780254 GLYMA_11G238300				26.1713		26.2839	27.4237	27.7216	27.389	27.4837	27.9298	27.6092	27.4642	28.0473	27.5256	28.0792	27.1336	28.3325	27.8809	27.9671	27.7028	27.8192	27.9403	biosynthetic process;metabolic process	binding;catalytic activity;cofactor binding;pyridoxal phosphate binding;vitamin B6 binding;vitamin binding		+	10	9	5	31.9	30	19	51.375	0	113.85	3756200000	63	3.31452	0.00480807
I1N672	Glycosyltransferase (EC 2.4.1.-)	100795128 GLYMA_19G025200		23.8667	23.4914	23.7641	24.2959	24.0115	24.6474	25.1023	24.6579	25.1334	25.1345	24.7298	24.5863	24.8001	24.6658				25.0798	25.0961					catalytic activity;transferase activity;transferase activity, transferring glycosyl groups;transferase activity, transferring hexosyl groups		+	3	3	3	9.4	9.4	9.4	51.173	0	6.5982	481460000	10	3.31143	0.0048182
K7LVG8;I1LTI0;Q2TFP3;C6TLJ6;C6TBC3;A0A0R0H6W8;I1M4K4;C6TI29	Uncharacterized protein	732604 GLYMA_12G172500	33.2824	33.0243	33.3705	32.7387	33.2621	33.2836	32.4161	32.9206	32.7605	32.3387	31.9424	31.7434	32.0509	32.3752	32.4277	32.3605	32.985	32.2295	32.1599	32.3225	32.3765	31.4085	32.0367		transporter activity	cell part;integral to membrane;intrinsic to membrane;membrane part	+	6	6	5	31.5	31.5	26.8	27.162	0	323.31	136950000000	505	3.28074	0.00511825
C6TDN0;I1LSM1	Uncharacterized protein		26.9614	27.0307	27.3212	26.7089	26.7256	27.4042	27.0421	26.6454	26.2131	25.867	25.5668	25.3978	26.0577	26.1693	26.1607	26.4957	27.1154	25.7801		25.7247	25.8662		25.2863		electron carrier activity		+	4	4	2	25	25	11.5	22.357	0	138.27	1821500000	36	3.27873	0.00511825
K7LPB1;I1LJH2;C6TGS9;I1LQ65;I1LQ64;A0A0R0H152	Uncharacterized protein	100805941 GLYMA_11G120900	25.7093	25.9245		25.8447	26.0567		26.1482	26.6431	27.3454	27.3274	27.1493	27.2679	26.3855	26.6417	26.9658	26.6647	27.0983	27.1024	27.2883	27.0444	26.8547	27.2441	27.1943	alcohol biosynthetic process;alcohol metabolic process;biosynthetic process;carbohydrate metabolic process;carboxylic acid metabolic process;cellular aldehyde metabolic process;cellular biosynthetic process;cellular carbohydrate metabolic process;cellular ketone metabolic process;cellular lipid metabolic process;cellular metabolic process;cellular process;dimethylallyl diphosphate biosynthetic pr…	4-hydroxy-3-methylbut-2-en-1-yl diphosphate reductase activity;binding;catalytic activity;cation binding;ion binding;metal ion binding;oxidoreductase activity;oxidoreductase activity, acting on CH or CH2 groups;oxidoreductase activity, acting on CH or CH2 groups, NAD or NADP as acceptor		+	4	4	4	11.7	11.7	11.7	50.041	0	10.078	2301600000	31	3.28086	0.00511825
C6SWX2;K7L6V9	Uncharacterized protein	100785157 GLYMA_15G271700	25.5968	25.3714	25.9891	25.48	24.4228	24.1457	24.2492	24.3019	24.6037	24.4071	24.7334	24.2489	24.1616	24.182	24.2031	23.9969	23.8401	23.9035	23.8576	24.1107	24.0611	23.9489	24.61				+	3	3	3	25	25	25	15.092	0	7.6282	528100000	14	3.27171	0.00517611
K7MGS9;A0A0R0G040;I1MMX7;I1JCA6;K7MGT0;K7MGT1	Uncharacterized protein	100776447 GLYMA_16G118400	26.8874	27.1348		26.7189	26.5905		26.013	26.2155		25.9503	25.8469	25.9562	26.1928														+	6	6	3	18.7	18.7	6.9	51.016	0	25.444	1262400000	20	3.26845	0.00518972
C6SXI6	40S ribosomal protein S26	100499862 GLYMA_02G239700	26.9535	27.4733	26.7433	27.7489	27.5421	27.1437	26.501	27.0574	25.0547	27.1445	27.7142	27.2203	27.1562	26.4482	25.0064	25.1633	25.1272	26.1067	26.1719	25.7399	26.8339	26.5611	25.8361	biosynthetic process;cellular biosynthetic process;cellular macromolecule biosynthetic process;cellular macromolecule metabolic process;cellular metabolic process;cellular process;cellular protein metabolic process;macromolecule biosynthetic process;macromolecule metabolic process;metabolic process;primary metabolic process;protein metabolic process;translation	structural constituent of ribosome;structural molecule activity	cell part;cytoplasmic part;intracellular non-membrane-bounded organelle;intracellular organelle;intracellular part;macromolecular complex;non-membrane-bounded organelle;organelle;ribonucleoprotein complex;ribosome	+	7	5	3	38.5	20	19.2	14.929	0	16.926	2505000000	55	3.26216	0.00522102
I1MJ89	Uncharacterized protein	102659434 GLYMA_15G257300	25.2383	25.1352		25.5393	25.2659	25.2857	25.8662	25.3313	25.9671	25.9317	26.073	26.0294	25.7437	25.4773	25.874	25.8472	25.5689	26.2522	26.2313	26.105					binding;catalytic activity;cation binding;ion binding;metal ion binding;oxidoreductase activity;oxidoreductase activity, acting on paired donors, with incorporation or reduction of molecular oxygen;oxidoreductase activity, acting on paired donors, with incorporation or reduction of molecular oxygen, 2-oxoglutarate as one donor, and incorporation of one atom each of oxygen into both donors		+	3	3	3	7.3	7.3	7.3	41.795	0	6.1954	1134100000	22	3.25995	0.00522102
K7N3G6	Amine oxidase (EC 1.4.3.-)	100799555 GLYMA_20G145100	26.0737	26.4112	26.1399	26.1571	27.0984	26.7436	25.6726	25.9519	25.8567	25.4702	25.5959		25.9814	25.8701	25.6843	25.9066	25.9725	25.4288	25.1488			24.9938	25.4418	amine metabolic process;metabolic process;nitrogen compound metabolic process	binding;catalytic activity;cation binding;cofactor binding;copper ion binding;ion binding;metal ion binding;oxidoreductase activity;oxidoreductase activity, acting on the CH-NH2 group of donors;oxidoreductase activity, acting on the CH-NH2 group of donors, oxygen as acceptor;primary amine oxidase activity;quinone binding;transition metal ion binding		+	6	6	6	10.7	10.7	10.7	75.982	0	30.506	1273700000	38	3.25953	0.00522102
I1M7D9	Uncharacterized protein	100812604 GLYMA_14G045100	26.8673	26.3034	26.0356	26.6914	26.7057	26.968	26.9498	27.1468	27.7771	27.4746	27.6157	27.3241	27.5508	27.3848	27.6133	27.2716	27.2803	27.3734	27.4148	27.5584	27.5213	27.4214	27.4212		2 iron, 2 sulfur cluster binding;binding;catalytic activity;cation binding;coenzyme binding;cofactor binding;electron carrier activity;flavin adenine dinucleotide binding;ion binding;iron ion binding;iron-sulfur cluster binding;metal cluster binding;metal ion binding;oxidoreductase activity;oxidoreductase activity, acting on CH-OH group of donors;transition metal ion binding		+	13	13	13	10.6	10.6	10.6	150.66	0	31.245	3382400000	93	3.24711	0.00533539
I1N0U1	Uncharacterized protein	100803418 GLYMA_18G103500	28.2634	27.9807	28.9378	28.2792	26.9361	27.764	27.6266	26.4727	26.4738	26.1386	25.7058	26.3685	26.514	26.5381	26.5873	26.6262	26.3113	26.8027	26.8681	27.7987	26.1908	26.7965	26.0704		catalytic activity;transferase activity;transferase activity, transferring acyl groups;transferase activity, transferring acyl groups other than amino-acyl groups		+	9	9	8	26.3	26.3	24.5	50.849	0	29.698	3163000000	68	3.24596	0.00533539
I1LGS5;A0A0R0HNI5;Q945U4	Acyl-coenzyme A oxidase	GLYMA_11G035200	29.6077	29.4231	29.5474	29.6655	29.5923	29.5485	29.7381	29.9104	30.0405	29.8103	29.8882	29.8157	29.9283	29.951	29.8844	29.968	30.1684	30.0194	29.8877	29.9286	29.8827	29.5789	29.8003	carboxylic acid catabolic process;carboxylic acid metabolic process;catabolic process;cellular catabolic process;cellular ketone metabolic process;cellular lipid catabolic process;cellular lipid metabolic process;cellular metabolic process;cellular process;fatty acid beta-oxidation;fatty acid catabolic process;fatty acid metabolic process;fatty acid oxidation;lipid catabolic process;lipid metabol…	acyl-CoA dehydrogenase activity;acyl-CoA oxidase activity;binding;catalytic activity;coenzyme binding;cofactor binding;flavin adenine dinucleotide binding;oxidoreductase activity;oxidoreductase activity, acting on the CH-CH group of donors;oxidoreductase activity, acting on the CH-CH group of donors, oxygen as acceptor	cell part;cytoplasmic part;intracellular membrane-bounded organelle;intracellular organelle;intracellular part;membrane-bounded organelle;microbody;organelle;peroxisome	+	22	22	4	40.9	40.9	6.3	74.519	0	137.55	20709000000	211	3.22541	0.00546149
I1M751;C6TDP2	Uncharacterized protein	100820063 GLYMA_14G035500	27.7682	27.6708	27.5107	27.7466	27.8118	27.6346	27.3887	27.507	27.3724	27.3083	26.9985	26.9381	26.9446	27.0519	27.0723	27.1471	27.2245	26.6879	27.5088	27.1201	26.9892	26.7972	26.3752	cellular process;establishment of localization;transport;vesicle-mediated transport		cell part;integral to membrane;intrinsic to membrane;membrane part	+	7	7	3	44.3	44.3	16	24.97	0	31.797	4045800000	37	3.23338	0.00546149
I1KM30	Uncharacterized protein	100781948 GLYMA_07G215900	28.3489	29.2914	29.0053	28.5543	28.8939	29.0018	27.7301	28.0537	28.5918	27.7387	27.5327	27.4488	27.898	28.0588	28.0579	27.9499	28.3517	28.3252	27.9029	27.9895	27.8556	27.4478	27.8687				+	10	10	6	28.7	28.7	18.7	49.877	0	83.883	6491700000	137	3.22358	0.00546149
I1KQ93	Uncharacterized protein	100780166 GLYMA_08G044100	31.8631	32.0464	32.0215	31.5644	31.6899	31.7773	31.6653	31.4354	31.2957	31.6264	31.4357	31.5482	31.2927	31.4661	31.6837	31.3103	31.3708	31.3588	31.3107	31.1778	31.5513	31.2915	31.3823	carbohydrate metabolic process;metabolic process;primary metabolic process	binding;catalytic activity;cation binding;intramolecular transferase activity;intramolecular transferase activity, phosphotransferases;ion binding;isomerase activity;magnesium ion binding;metal ion binding		+	25	25	3	61.2	61.2	9.6	63.39	0	323.31	64840000000	434	3.22801	0.00546149
I1KTM3;A0A0R0GXN6	Uncharacterized protein	100819556 GLYMA_08G154900	31.7229	32.0236	31.8511	32.0493	32.3001	32.2886	32.2168	31.9915	32.2383	31.896	31.7284	32.0558	31.9421	31.841	31.9813	31.9567	31.8192	31.5957	31.7044	31.7028	31.7787	31.7108	31.7151	cellular process;establishment of localization;transmembrane transport;transport	transporter activity	cell part;cytoplasmic part;integral to membrane;intracellular organelle part;intracellular part;intrinsic to membrane;membrane;membrane part;mitochondrial inner membrane;mitochondrial membrane;mitochondrial part;organelle inner membrane;organelle membrane;organelle part	+	15	15	1	32.2	32.2	3.1	42.002	0	66.059	88529000000	343	3.22409	0.00546149
K7L7D2;C6T611	Uncharacterized protein	100785537 GLYMA_08G178100			27.7942	26.3935	25.875	27.2478	27.5626	27.7057	28.1024	28.1092	28.9623	28.2266	28.5577	28.755	27.3249	28.4432	28.6373	29.0742	28.6831	28.7543	28.6345	28.3096	28.5317	amine metabolic process;aromatic amino acid family metabolic process;carboxylic acid metabolic process;cellular amine metabolic process;cellular amino acid metabolic process;cellular aromatic compound metabolic process;cellular ketone metabolic process;cellular metabolic process;cellular nitrogen compound metabolic process;cellular process;metabolic process;nitrogen compound metabolic process;org…	catalytic activity;monooxygenase activity;nitronate monooxygenase activity;oxidoreductase activity;oxidoreductase activity, acting on single donors with incorporation of molecular oxygen;oxidoreductase activity, acting on single donors with incorporation of molecular oxygen, incorporation of one atom of oxygen (internal monooxygenases or internal mixed function oxidases)	cell part;cytoplasmic part;cytosol;intracellular part	+	9	9	9	30	30	30	35.4	0	32.908	7287400000	68	3.22838	0.00546149
I1MM08;I1MM09	Malic enzyme	100784112 GLYMA_16G077800	29.737	29.9457	30.1277	29.9456	29.6174	29.5005	30.0037	29.5916	29.6134	29.067	29.1351	29.1478	29.3149	29.4055	29.3655	29.1996	29.7592	29.2877	29.4376	29.2478	29.1776	29.2402	29.2027	carboxylic acid metabolic process;cellular ketone metabolic process;cellular metabolic process;cellular process;dicarboxylic acid metabolic process;malate metabolic process;metabolic process;organic acid metabolic process;oxoacid metabolic process;small molecule metabolic process	binding;catalytic activity;cation binding;coenzyme binding;cofactor binding;ion binding;malate dehydrogenase (decarboxylating) activity;malate dehydrogenase activity;malic enzyme activity;metal ion binding;NAD binding;nucleotide binding;oxidoreductase activity;oxidoreductase activity, acting on CH-OH group of donors;oxidoreductase activity, acting on the CH-OH group of donors, NAD or NADP as acce…		+	30	7	7	54	21	21	65.194	0	150.81	16532000000	170	3.21512	0.00554333
I1L6W0	Uncharacterized protein	100794734 GLYMA_09G270500	26.3551	26.9399	26.9337	27.1011	26.9328		28.0112	27.1614	27.7223	27.8858	28.5846	28.1027	28.2767	28.2706	28.8222	28.0983		28.2183	28.269		28.0395	28.056		alcohol catabolic process;alcohol metabolic process;carbohydrate catabolic process;carbohydrate metabolic process;catabolic process;cellular carbohydrate catabolic process;cellular carbohydrate metabolic process;cellular metabolic process;cellular process;glucose catabolic process;glucose metabolic process;hexose catabolic process;hexose metabolic process;metabolic process;monosaccharide cataboli…	binding;catalytic activity;cation binding;intramolecular transferase activity;intramolecular transferase activity, phosphotransferases;ion binding;isomerase activity;manganese ion binding;metal ion binding;phosphoglycerate mutase activity;transition metal ion binding	cell part;cytoplasm;intracellular part	+	24	5	5	49	8.4	8.4	60.868	0	32.347	5235900000	24	3.20642	0.00558152
I1MCM6;I1MCM7	Uncharacterized protein	100807969 GLYMA_15G013900	26.3454	25.5004		26.2622	26.8742		27.334	27.0132	26.9683	27.2059	27.6271	27.3313	27.9283	27.5627	27.6751	27.3939	27.0503	28.0449	28.0056	27.7	27.6236	26.8767	27.6944				+	9	9	9	37.8	37.8	37.8	35.123	0	40.852	3327200000	41	3.20825	0.00558152
Q8W198;A0A0R0FUL1	Phosphate transporter		29.2252	29.4063	29.7676	30.0892	29.8883	29.8562	30.1194	30.1146	29.8658	30.0359	30.0536	30.3201	30.4034	30.1278	30.028	30.0048	30.0861	30.1322	30.2382	30.2969	30.0977	29.9435	30.1539	establishment of localization;transport		cell part;integral to membrane;intrinsic to membrane;membrane part	+	9	9	2	26.9	26.9	7.6	36.322	0	96.566	22984000000	204	3.20617	0.00558152
Q2LAL0	Cytochrome P450 monooxygenase CYP81E11	CYP81E11 100801092 GLYMA_09G049100	28.9186	28.4281	29.352	29.0339	28.1846	28.2469	29.2908	29.5279	29.0314	29.8494	30.191	30.0966	29.6173	29.4512	29.2009	29.459	29.696	29.4343	29.8181	29.5253	29.4323	30.1205	29.9983		binding;catalytic activity;cation binding;heme binding;ion binding;iron ion binding;metal ion binding;monooxygenase activity;oxidoreductase activity;oxidoreductase activity, acting on paired donors, with incorporation or reduction of molecular oxygen;tetrapyrrole binding;transition metal ion binding		+	19	19	12	39.8	39.8	26.6	57.914	0	297.99	15053000000	218	3.19188	0.00574209
I1JKU5;I1JKU6;C6SWD7	Uncharacterized protein	100305725 GLYMA_03G032100	26.6415	26.222	26.41	26.0634	26.0013	26.3684	25.6895	25.5146	25.4117	25.9814	26.215	26.0193	25.9385	25.7101	25.5114	25.9224	25.3552	25.9584	26.4589	26.5091	26.2112	26.0755	26.277			cell part;cytoplasmic part;endoplasmic reticulum membrane;endoplasmic reticulum part;intracellular organelle part;intracellular part;membrane;membrane part;organelle membrane;organelle part	+	5	5	1	30.3	30.3	4.6	26.749	0	38.66	1444800000	59	3.18984	0.00574317
I1MM56;A0A0R0FVK4;I1MM55	Carboxypeptidase (EC 3.4.16.-)	100792057 GLYMA_16G082700		26.6761	27.0699	26.1758	26.4981	27.0336	26.9232	26.812	26.7539	26.9384	26.9997	27.0953	27.2625	27.143	27.3634	27.6657	27.2289	27.5368	27.773	27.4917	27.4209	27.333	27.6696		carboxypeptidase activity;catalytic activity;exopeptidase activity;hydrolase activity;peptidase activity;peptidase activity, acting on L-amino acid peptides;serine hydrolase activity;serine-type carboxypeptidase activity;serine-type exopeptidase activity;serine-type peptidase activity		+	8	8	8	22.1	22.1	22.1	53.234	0	22.798	3034700000	45	3.18349	0.00580167
E2FKH2	Sieve element occlusion a	SEOa 100778245 Glyma02g00280 GLYMA_02G000700	27.6431	27.6703		27.6806	27.9536		26.9337	26.6296	26.282		25.6764		25.6651	25.7303	26.0778						25.9851						+	20	3	3	33	7.6	7.6	80.062	0	11.273	1681300000	22	3.17526	0.0058862
A0A0R0FM59;I1MLP0	Glucose-6-phosphate 1-dehydrogenase (EC 1.1.1.49)	100793462 GLYMA_16G063200	31.2649	30.864	30.9398	31.2739	31.0802	31.1513	32.041	31.5465	31.4569	31.6248	31.8254	31.8123	31.6449	31.7451	31.3749	31.8718	31.4337	31.7944	31.6744	31.6966	31.6657	31.8827	31.8929	alcohol catabolic process;alcohol metabolic process;carbohydrate catabolic process;carbohydrate metabolic process;catabolic process;cellular carbohydrate catabolic process;cellular carbohydrate metabolic process;cellular metabolic process;cellular nitrogen compound metabolic process;cellular process;coenzyme metabolic process;cofactor metabolic process;glucose catabolic process;glucose metabolic …	binding;catalytic activity;coenzyme binding;cofactor binding;glucose-6-phosphate dehydrogenase activity;NADP binding;nucleotide binding;oxidoreductase activity;oxidoreductase activity, acting on CH-OH group of donors;oxidoreductase activity, acting on the CH-OH group of donors, NAD or NADP as acceptor		+	27	27	7	59.1	59.1	14.7	59.27	0	186.02	68556000000	365	3.17211	0.00590275
I1LH25;P37228;K7K4T0	Malate dehydrogenase (EC 1.1.1.37)	732641 GLYMA_11G043900	25.9965	26.0063	26.1885	26.5545	26.1034	26.4921	26.3926	26.6155	26.8192	26.9577	26.6974	26.9879	26.6424	26.7091	26.5105	26.7011	27.1486	26.9607	26.9054	26.9198	26.7568	26.8258	27.0398	acetyl-CoA catabolic process;acetyl-CoA metabolic process;carbohydrate metabolic process;carboxylic acid metabolic process;catabolic process;cellular aldehyde metabolic process;cellular carbohydrate metabolic process;cellular catabolic process;cellular ketone metabolic process;cellular metabolic process;cellular process;coenzyme catabolic process;coenzyme metabolic process;cofactor catabolic proc…	catalytic activity;L-malate dehydrogenase activity;malate dehydrogenase activity;oxidoreductase activity;oxidoreductase activity, acting on CH-OH group of donors;oxidoreductase activity, acting on the CH-OH group of donors, NAD or NADP as acceptor	cell part;cytoplasmic part;glyoxysome;intracellular membrane-bounded organelle;intracellular organelle;intracellular part;membrane-bounded organelle;microbody;organelle;peroxisome	+	5	4	2	17.8	14.4	7.1	37.398	0	26.343	2189200000	67	3.16564	0.00596484
C6T3M1;A0A0R0GE22	Uncharacterized protein		31.3537	30.9625	31.5442	31.0556	31.012	31.1424	31.1358	30.6695	30.5983	30.7128	30.0636	29.8678	29.6642	30.5155	30.039	30.261	30.6649	29.9188	29.2645	30.2932	29.9788	29.2672	29.7523	defense response;response to biotic stimulus;response to stimulus;response to stress			+	10	6	6	78.3	46.7	46.7	17.576	0	323.31	32411000000	190	3.14471	0.00617734
I1J4W3;I1L4W3	Uncharacterized protein	100791015 GLYMA_01G019200	24.5906				25.2875			24.9471	25.4004		25.3781	25.9305	25.0533	25.6379		25.2578	25.7257	27.3585	27.4473	27.1187	25.4835		25.7812	alcohol biosynthetic process;alcohol metabolic process;biosynthetic process;carbohydrate biosynthetic process;carbohydrate metabolic process;cellular biosynthetic process;cellular carbohydrate biosynthetic process;cellular carbohydrate metabolic process;cellular metabolic process;cellular process;gluconeogenesis;glucose metabolic process;hexose biosynthetic process;hexose metabolic process;metabo…	adenyl nucleotide binding;adenyl ribonucleotide binding;ATP binding;binding;carbon-carbon lyase activity;carboxy-lyase activity;catalytic activity;lyase activity;nucleotide binding;phosphoenolpyruvate carboxykinase (ATP) activity;phosphoenolpyruvate carboxykinase activity;purine nucleotide binding;purine ribonucleoside triphosphate binding;purine ribonucleotide binding;ribonucleotide binding		+	9	4	4	18.8	9.2	9.2	73.103	0	37.94	966160000	18	3.14592	0.00617734
K7KRR3;I1K5Y5	Malic enzyme	100782096 GLYMA_05G227400	28.7729	28.5997	29.0908	29.319	29.5344	29.4859	30.1102	29.6516	29.9598	29.7707	29.9164	29.5986	30.041	30.0684	29.7041	30.006	29.8066	29.5917	29.3663	29.751	29.8082	29.5697	28.9029	carboxylic acid metabolic process;cellular ketone metabolic process;cellular metabolic process;cellular process;dicarboxylic acid metabolic process;malate metabolic process;metabolic process;organic acid metabolic process;oxoacid metabolic process;small molecule metabolic process	binding;catalytic activity;cation binding;coenzyme binding;cofactor binding;ion binding;malate dehydrogenase (decarboxylating) activity;malate dehydrogenase activity;malic enzyme activity;metal ion binding;NAD binding;nucleotide binding;oxidoreductase activity;oxidoreductase activity, acting on CH-OH group of donors;oxidoreductase activity, acting on the CH-OH group of donors, NAD or NADP as acce…		+	23	9	3	40.1	16.1	3.4	65.421	0	87.149	17915000000	82	3.14496	0.00617734
Q7XZQ1;O03376;Q7XZQ0;Q41266	Ubiquinol oxidase (EC 1.10.3.11)	Aox2b 548077 GLYMA_08G072200	26.9165	26.575		27.0998	26.7879		27.8206	27.865	27.7197	27.7945	28.0265	27.8604	27.973	28.2185	27.7766	28.2166	28.0791	27.6114	27.9057	28.3545	27.9298	27.5147	28.402		alternative oxidase activity;binding;catalytic activity;cation binding;ion binding;metal ion binding;oxidoreductase activity;oxidoreductase activity, acting on diphenols and related substances as donors;oxidoreductase activity, acting on diphenols and related substances as donors, oxygen as acceptor	cell part;cytoplasmic part;integral to membrane;intracellular organelle part;intracellular part;intrinsic to membrane;membrane;membrane part;mitochondrial inner membrane;mitochondrial membrane;mitochondrial part;organelle inner membrane;organelle membrane;organelle part;respiratory chain	+	4	4	3	14.7	14.7	11.7	37.115	0	12.035	4823900000	61	3.13449	0.00629688
I1K2W7	Uncharacterized protein	100779395 GLYMA_05G124800	28.1389	27.0598	27.8977	27.7737	27.7846	27.3055	28.6311	28.5515	27.7749	28.9569	28.8494	28.3947	28.7083	28.7742	28.6262	29.0596	29.4784	29.2306	29.0397	28.7332	28.6376	28.6922	28.6861		binding;catalytic activity;coenzyme binding;cofactor binding;flavin adenine dinucleotide binding;oxidoreductase activity;oxidoreductase activity, acting on CH-OH group of donors;oxidoreductase activity, acting on the CH-OH group of donors, NAD or NADP as acceptor;UDP-N-acetylmuramate dehydrogenase activity		+	11	11	11	21.5	21.5	21.5	61.463	0	119.19	9061300000	118	3.13076	0.00632373
I1L068;C6TAZ2;Q39824	Uncharacterized protein	100784816 GLYMA_09G016700 GLYMA_15G122300	29.2086	29.1409	28.8697	28.8654	28.9886	29.1123	29.0089	29.0667	29.1213	28.8046	28.7905	28.8817	28.8343	28.8842	28.6807	28.9536	28.6929	28.7391	28.9553	28.7749	28.6644	28.3544	28.4047	biological regulation;cellular process;cellular response to stimulus;establishment of localization;establishment of protein localization;intracellular signal transduction;protein transport;regulation of biological process;regulation of cellular process;response to stimulus;signal transduction;small GTPase mediated signal transduction;transport	binding;GTP binding;guanyl nucleotide binding;guanyl ribonucleotide binding;nucleotide binding;purine nucleotide binding;purine ribonucleoside triphosphate binding;purine ribonucleotide binding;ribonucleotide binding		+	10	10	8	53.6	53.6	42.2	23.147	0	27.085	9991700000	89	3.12558	0.00637212
A0A0R4J669;I1NHP8;A0A0R0ED69	Pyruvate kinase (EC 2.7.1.40)	100799747 GLYMA_20G189300	29.8653	29.9687	29.2863	29.9892	30.2448	29.9096	30.3484	30.0627	29.9178	30.6843	30.6808	31.0539	30.5552	30.5625	30.8095	30.8599	29.91	30.9311	31.1311	30.7952	30.9434	31.3326	30.675	alcohol catabolic process;alcohol metabolic process;carbohydrate catabolic process;carbohydrate metabolic process;catabolic process;cellular carbohydrate catabolic process;cellular carbohydrate metabolic process;cellular metabolic process;cellular process;generation of precursor metabolites and energy;glucose catabolic process;glucose metabolic process;glycolysis;hexose catabolic process;hexose m…	alkali metal ion binding;binding;catalytic activity;cation binding;ion binding;kinase activity;magnesium ion binding;metal ion binding;phosphotransferase activity, alcohol group as acceptor;potassium ion binding;pyruvate kinase activity;transferase activity;transferase activity, transferring phosphorus-containing groups		+	12	12	3	27.2	27.2	7.8	57.919	0	130.95	34911000000	160	3.11448	0.00650895
A0A0R0GTU4;I1M2L3;A0A0R0H448;A0A0R0GTY7	Uncharacterized protein	100806165 GLYMA_13G255300	28.4273	28.1505	28.419	28.5205	28.3282	28.697	28.9649	28.7608	28.8748	28.8598	29.3309	28.7172	28.9977	29.0474	29.0913	29.2352	29.0114	29.2814	29.1335	29.1727	29.1327	28.619	29.1234		binding;catalytic activity;cation binding;ion binding;metal ion binding;oxidoreductase activity;transition metal ion binding;zinc ion binding		+	15	15	6	46.5	46.5	16.8	38.641	0	113.61	10280000000	141	3.11254	0.00651014
I1LTA4;I1LTA5;C6TNU2	EF1Bgamma class glutathione S-transferase	EF1Bgamma2 100795680 GLYMA_12G165500	30.2415	30.3346	30.2606	30.2017	30.3228	29.9268	29.8477	29.8044	29.9176	29.8375	29.3755	29.4647	29.5825	29.8368	29.9379	29.5692	29.2006	29.412	29.5114	29.604	29.5455	29.5744	29.6553		binding;catalytic activity;nucleic acid binding;RNA binding;transferase activity;translation elongation factor activity;translation factor activity, nucleic acid binding		+	13	13	5	34.7	34.7	14.6	47.467	0	323.31	19253000000	235	3.10857	0.00651427
I1MGT7	Uncharacterized protein	100790467 GLYMA_15G156400	25.0152	25.5017	25.2826	25.4151	25.3574	25.0448	26.0805	25.4858	25.3331	26.1503	26.0429	26.0341	25.9591	25.9169	26.0634	26.4269	25.5981	26.2201	26.3336	26.4378	25.8687	26.4057	26.3347		binding;calcium ion binding;cation binding;ion binding;metal ion binding		+	8	8	3	14.8	14.8	5.3	69.995	0	70.908	1284400000	45	3.10863	0.00651427
I1LJG3;C6TLP4	Uncharacterized protein	100803804 GLYMA_11G120200	30.9673	30.7025	31.0761	30.6661	31.0423	30.9399	30.3938	30.7149	30.5433	30.0436	30.1489	29.8549	30.1102	30.4555	29.9754	30.2063	30.825	30.4469	30.2207	30.063	30.1353	29.8263	29.946	biological regulation;negative regulation of biological process;negative regulation of biosynthetic process;negative regulation of cellular biosynthetic process;negative regulation of cellular macromolecule biosynthetic process;negative regulation of cellular metabolic process;negative regulation of cellular process;negative regulation of gene expression;negative regulation of macromolecule biosy…	binding;catalytic activity;coenzyme binding;cofactor binding;FMN binding;nucleotide binding;oxidoreductase activity		+	13	13	10	55.5	55.5	43.8	27.358	0	264.84	30819000000	303	3.09978	0.00661936
C6SV84;A0A0R4J3V9;A0A0R0IHS1;I1KQS0	Uncharacterized protein		25.9321	25.9688	26.1486	25.9044	25.7142		25.8636	26.1057	26.4184	26.4067	26.7392	26.1607	26.209	26.8406	27.0095	26.3233	26.8394	26.8714	27.2438	27.0287	27.061	26.6992	27.2583	biological regulation;negative regulation of biological process;negative regulation of biosynthetic process;negative regulation of cellular biosynthetic process;negative regulation of cellular macromolecule biosynthetic process;negative regulation of cellular metabolic process;negative regulation of cellular process;negative regulation of gene expression;negative regulation of macromolecule biosy…	binding;catalytic activity;coenzyme binding;cofactor binding;FMN binding;nucleotide binding;oxidoreductase activity		+	6	3	2	36.1	18	10.7	21.806	0	6.6333	1956900000	28	3.0972	0.00663083
I1KY39;K7MR36	Citrate synthase (EC 2.3.3.16)	100775180 GLYMA_08G311200	26.0396	26.2568	26.1822	26.2586	26.7502	26.3392	26.4206	26.7231	26.7514	26.6498	26.8472	27.1711	27.0418	26.8623	26.2761	26.7776	26.5373	27.538	27.1544	27.2015	26.5668	26.9494	27.1775	acetyl-CoA catabolic process;acetyl-CoA metabolic process;carbohydrate metabolic process;catabolic process;cellular carbohydrate metabolic process;cellular catabolic process;cellular metabolic process;cellular process;coenzyme catabolic process;coenzyme metabolic process;cofactor catabolic process;cofactor metabolic process;metabolic process;primary metabolic process;tricarboxylic acid cycle	catalytic activity;transferase activity;transferase activity, transferring acyl groups;transferase activity, transferring acyl groups, acyl groups converted into alkyl on transfer		+	8	8	6	17.2	17.2	13.6	56.479	0	28.382	2351600000	50	3.09113	0.00669609
A0A0R0LAT1;I1MBV9	Uncharacterized protein	GLYMA_02G244400	26.1054	25.856	25.8483	25.6199	25.641	25.9889	25.2969	25.6992	25.5344		25.2545	25.5019	24.9193	25.1034	24.9245	25.0269	25.3202	25.4378	25.4057		25.1755				adenyl nucleotide binding;adenyl ribonucleotide binding;ATP binding;binding;catalytic activity;kinase activity;nucleotide binding;phosphotransferase activity, alcohol group as acceptor;protein kinase activity;purine nucleotide binding;purine ribonucleoside triphosphate binding;purine ribonucleotide binding;ribonucleotide binding;transferase activity;transferase activity, transferring phosphorus-c…	cell part;integral to membrane;intrinsic to membrane;membrane part	+	5	5	5	10.5	10.5	10.5	66.414	0	25.993	865710000	26	3.08154	0.00681709
I1M4L1	Uncharacterized protein	100801743 GLYMA_13G326400	28.3132	28.5768	27.9669	28.3975	28.4798	28.752	29.0378	28.9899	28.9288	29.2326	29.2114	29.2185	29.0383	28.8732	28.9922	28.8576	28.6788	29.0297	29.1274	29.1612	28.741	29.4473	29.5494	biosynthetic process;cellular biosynthetic process;cellular lipid metabolic process;cellular metabolic process;cellular process;isoprenoid biosynthetic process;isoprenoid metabolic process;lipid biosynthetic process;lipid metabolic process;metabolic process;primary metabolic process;terpenoid biosynthetic process;terpenoid metabolic process	4-hydroxy-3-methylbut-2-en-1-yl diphosphate synthase activity;binding;catalytic activity;cation binding;ion binding;iron ion binding;metal ion binding;oxidoreductase activity;oxidoreductase activity, acting on CH or CH2 groups;oxidoreductase activity, acting on CH or CH2 groups, with an iron-sulfur protein as acceptor;transition metal ion binding		+	21	21	1	31.8	31.8	1.5	82.423	0	138.64	10636000000	189	3.07362	0.00691365
A7BIC9;A0A1Y9TFD9	Malonyl-CoA:isoflavone 7-O-glucoside-6''-O-malonyltransferase (Malonyltransferase MT7)	GmIF7MaT 100127426 GLYMA_13G056100	29.3484	29.1966	29.4715	29.5073	29.6429	29.3594	29.8367	29.454	29.8784	29.6611	29.6665	29.8274	29.7858	29.655	29.8819	29.9456	29.7397	30.0781	30.0592	29.9227	29.8752	30.2019	29.8234		catalytic activity;transferase activity;transferase activity, transferring acyl groups;transferase activity, transferring acyl groups other than amino-acyl groups		+	15	15	10	28.9	28.9	22.7	51.663	0	222.96	18258000000	179	3.06118	0.00705458
C6TEZ8	Uncharacterized protein	100791447 GLYMA_11G228000	29.6066	29.2544	29.4162	29.1077	29.1609	29.4761	28.9982	28.7021	28.4076	28.3567	27.9422	27.9373	28.6622	28.926	28.5695	28.5766	29.3054	28.7802	28.2468	28.2951	28.861	28.3122	28.1998		transporter activity	cell part;integral to membrane;intrinsic to membrane;membrane part	+	7	5	5	29.1	25.6	25.6	30.779	0	165.96	12011000000	102	3.05973	0.00705458
I1MZ13	Clathrin heavy chain	GLYMA_18G026000	28.8153	28.9203	28.833	28.6465	28.4803	28.7136	28.3816	28.643	28.7242	28.3493	28.5621	28.3267	28.45	27.9407	27.9333	28.4576	27.9167	27.9773	28.1262	28.1654	28.3413	28.2601	28.2686	cellular process;establishment of localization;establishment of localization in cell;establishment of protein localization;intracellular protein transport;intracellular transport;protein transport;transport;vesicle-mediated transport	structural molecule activity	cell part;clathrin coat;clathrin coat of coated pit;clathrin coat of trans-Golgi network vesicle;clathrin vesicle coat;cytoplasmic part;cytoplasmic vesicle part;Golgi apparatus part;intracellular organelle part;intracellular part;macromolecular complex;membrane coat;membrane part;organelle part;plasma membrane part;protein complex;vesicle coat	+	57	11	0	36.4	7.6	0	192.92	0	95.463	7471800000	70	3.05949	0.00705458
C6SW20;C6SVZ3;A0A0R0F2E8;C6T7H0	Uncharacterized protein	100305650 GLYMA_03G231800	26.8767	27.0365	26.9911	26.9365	26.8534		26.8716	26.7967	26.6158	26.7094	26.5129		26.5293	26.572	26.6207	26.7488	26.6369	26.5722	26.5698	26.8346	26.3884	26.5025	26.4618	cellular process;establishment of localization;establishment of localization in cell;establishment of protein localization;intracellular protein transport;intracellular transport;protein transport;transport;vesicle-mediated transport	binding;GTP binding;guanyl nucleotide binding;guanyl ribonucleotide binding;nucleotide binding;purine nucleotide binding;purine ribonucleoside triphosphate binding;purine ribonucleotide binding;ribonucleotide binding	cell part;cytoplasmic part;endoplasmic reticulum;Golgi apparatus;intracellular membrane-bounded organelle;intracellular organelle;intracellular part;membrane-bounded organelle;organelle	+	3	3	1	22.3	22.3	9.8	22.128	0	10.749	2159600000	27	3.05554	0.00708374
I1J8G3;I1J8G4	Phospholipase D (EC 3.1.4.4)	100801787 GLYMA_01G162100	27.2251	27.3053	27.078	26.4764	27.1705	26.712	26.5923	26.7745	27.0755	26.5449	26.3429	26.5986	26.4148	26.2423	26.7457	26.5191	26.7758	26.5022	26.7111	26.29	26.3329	26.0201	26.2376	alcohol metabolic process;amine metabolic process;catabolic process;cellular amine metabolic process;cellular biogenic amine metabolic process;cellular lipid metabolic process;cellular metabolic process;cellular nitrogen compound metabolic process;cellular process;ethanolamine-containing compound metabolic process;glycerolipid metabolic process;glycerophospholipid metabolic process;lipid cataboli…	binding;calcium ion binding;catalytic activity;cation binding;hydrolase activity;hydrolase activity, acting on ester bonds;ion binding;lipase activity;metal ion binding;NAPE-specific phospholipase D activity;phospholipase activity;phospholipase D activity;phosphoric diester hydrolase activity;phosphoric ester hydrolase activity	cell part;membrane	+	8	8	1	13.4	13.4	2.3	98.118	0	35.141	2329300000	42	3.05239	0.00708374
I1J9Y0;I1J9X9;I1LGM2;I1J9X8	Hsp70-Hsp90 organizing protein 1	100776102 GLYMA_01G211200	27.9331	28.2764	27.6308	28.0215	28.2545	27.8083	26.8836	27.5715	27.3683	27.6861	27.4227	27.6688	27.3359	27.5277	27.2818	27.1958	26.9412	27.3257	27.4615	27.389	27.3405	27.0986	27.1139	cellular component assembly;cellular component assembly at cellular level;cellular component organization;cellular component organization at cellular level;cellular component organization or biogenesis;cellular component organization or biogenesis at cellular level;cellular macromolecular complex assembly;cellular macromolecular complex subunit organization;cellular process;cellular protein compl…	binding;heat shock protein binding;Hsp90 protein binding;preprotein binding;protein binding	cell part;cytoplasm;intracellular membrane-bounded organelle;intracellular organelle;intracellular part;membrane-bounded organelle;nucleus;organelle	+	11	11	9	20	20	15.6	65.664	0	177.63	4030700000	66	3.05323	0.00708374
I1JNI7;K7MYF1;I1N962	Uncharacterized protein	100780410 GLYMA_03G142700	26.8946	27.0354	26.7817	26.8513	26.9355	27.233	26.3074	26.5561	26.6074	26.2631	26.7628	26.5619	26.5979	26.1651	26.1594	26.1823	25.598	26.3659	25.9258	26.3352	26.3898	26.4449	26.216	anatomical structure morphogenesis;cell morphogenesis;cellular component morphogenesis;cellular component organization;cellular component organization or biogenesis;cellular developmental process;cellular process;developmental process			+	7	7	3	14	14	6.2	62.329	0	19.199	1954100000	37	3.04783	0.0071296
Q03773;A0A0R0KII9;C6TL98	Glucan endo-1,3-beta-glucosidase (EC 3.2.1.39) ((1->3)-beta-glucan endohydrolase) ((1->3)-beta-glucanase) (Beta-1,3-endoglucanase)		28.1368	28.6534	28.4045	27.875	27.6752	27.4819	26.946	26.6393	27.3259	27.0086	25.9099	27.3016	27.5553	27.5949	25.9699	26.359	26.7577	27.9705	27.7814	27.5733	27.697	28.522	27.1353	carbohydrate metabolic process;defense response;metabolic process;primary metabolic process;response to stimulus;response to stress	beta-glucosidase activity;catalytic activity;glucan endo-1,3-beta-D-glucosidase activity;glucosidase activity;hydrolase activity;hydrolase activity, acting on glycosyl bonds;hydrolase activity, hydrolyzing O-glycosyl compounds	cell part;cytoplasmic part;intracellular membrane-bounded organelle;intracellular organelle;intracellular part;membrane-bounded organelle;organelle;vacuole	+	9	9	9	36.6	36.6	36.6	38.111	0	62.017	4061700000	88	3.0386	0.00725349
I1M261	Uncharacterized protein	100810258 GLYMA_13G240600	27.0294	27.0735	26.5835	27.1884	27.7972	26.9334	27.8046	27.9259	27.8397	28.0131	27.4991	27.514	27.8353	27.9978	28.1661	27.9229	28.5772	27.95	27.9087	27.6608	27.7545	27.3876	27.6602	allantoin catabolic process;allantoin metabolic process;amine metabolic process;catabolic process;cellular amide catabolic process;cellular amide metabolic process;cellular catabolic process;cellular metabolic process;cellular nitrogen compound catabolic process;cellular nitrogen compound metabolic process;cellular process;heterocycle catabolic process;heterocycle metabolic process;metabolic proc…	allantoinase activity;binding;catalytic activity;cation binding;cobalt ion binding;hydrolase activity;hydrolase activity, acting on carbon-nitrogen (but not peptide) bonds;hydrolase activity, acting on carbon-nitrogen (but not peptide) bonds, in cyclic amides;ion binding;metal ion binding;transition metal ion binding;zinc ion binding		+	11	4	4	32.4	17.7	17.7	56.728	0	92.622	4463900000	59	3.0366	0.00725782
C6TJ60;I1JZS5;G8FVT2	Uncharacterized protein	100789547 GLYMA_05G029800	27.4596	27.9167	27.223	26.7967	28.1279	27.7821	26.1823	27.2333	26.3462	26.3912	25.6859	25.6952	25.463	26.0065	26.2057	25.8688	26.5545	26.2337	25.996	26.4855		25.9894	26.1294			cell part;membrane	+	10	6	3	35.6	22.2	12	31.368	0	15.219	2194000000	37	3.03328	0.00728442
C6T2R0	Uncharacterized protein	100526916 GLYMA_03G247500							25.7727		25.2717	29.0054	28.1667	28.9438	27.2834	26.474	27.8615	27.1538	26.5154	27.5941	28.8782	28.06	27.5218	27.1499	27.5665	defense response;defense response to bacterium;defense response to fungus;multi-organism process;response to bacterium;response to biotic stimulus;response to fungus;response to other organism;response to stimulus;response to stress			+	4	4	4	53.5	53.5	53.5	15.48	0	323.31	2612700000	119	3.02819	0.00729069
C6TIE9;I1M2Z5;C6TM07;Q8LJR6;C6THM4;I1LZI1	Uncharacterized protein (Fragment)		28.3601	28.2999	28.3572	28.1897	27.8253	28.034	28.0556	27.9408	27.6144	27.8168	27.837	27.6982	28.0308	27.9773	27.7891	27.762	28.1194	27.8118	27.7044	27.5994	27.4598	27.7189	27.6701	biological regulation;cellular process;cellular response to stimulus;establishment of localization;establishment of protein localization;intracellular signal transduction;protein transport;regulation of biological process;regulation of cellular process;response to stimulus;signal transduction;small GTPase mediated signal transduction;transport	binding;GTP binding;guanyl nucleotide binding;guanyl ribonucleotide binding;nucleotide binding;purine nucleotide binding;purine ribonucleoside triphosphate binding;purine ribonucleotide binding;ribonucleotide binding		+	8	8	2	42	42	10.4	21.842	0	22.142	5205800000	63	3.02774	0.00729069
I1JXQ5;I1KBX4	Alpha-mannosidase (EC 3.2.1.-)	100798150 GLYMA_04G200900	27.8278	27.873	27.6696	26.6377	27.4811	27.3284	26.111	26.3946	26.8221	26.6788	26.4586	26.0317	26.5161	26.9873	26.4904	26.5026	26.8716	26.3046	26.1662	26.3749	26.9877	26.1803	25.9371	alcohol metabolic process;carbohydrate metabolic process;cellular carbohydrate metabolic process;cellular metabolic process;cellular process;hexose metabolic process;mannose metabolic process;metabolic process;monosaccharide metabolic process;primary metabolic process;small molecule metabolic process	alpha-mannosidase activity;binding;carbohydrate binding;catalytic activity;cation binding;hydrolase activity;hydrolase activity, acting on glycosyl bonds;hydrolase activity, hydrolyzing O-glycosyl compounds;ion binding;mannosidase activity;metal ion binding;transition metal ion binding;zinc ion binding		+	13	8	8	12.8	8.1	8.1	114.28	0	13.368	2387700000	23	3.03094	0.00729069
I1KXE7	Uncharacterized protein	100809224 GLYMA_08G285900	31.293	30.8424	30.7464	31.0451	31.216	30.9845	31.6514	31.483	31.9723	31.423	31.9791	31.5642	32.0763	31.8855	32.0542	31.8678	31.4763	31.5285	31.4903	31.8017	31.6141	31.5217	31.641	anatomical structure morphogenesis;biological regulation;cell growth;cell morphogenesis;cell morphogenesis involved in differentiation;cell redox homeostasis;cell tip growth;cellular component morphogenesis;cellular component organization;cellular component organization or biogenesis;cellular developmental process;cellular homeostasis;cellular process;cellular process involved in reproduction;che…	catalytic activity;oxidoreductase activity;oxidoreductase activity, acting on a sulfur group of donors;oxidoreductase activity, acting on a sulfur group of donors, NAD or NADP as acceptor;oxidoreductase activity, acting on NADH or NADPH;protein-disulfide reductase activity	cell part;cytoplasmic part;cytosol;intracellular part	+	30	30	30	56.3	56.3	56.3	64.212	0	323.31	69286000000	534	3.01309	0.0075114
K7KI86;I1JTZ0;I1JTY8;I1K8E3	Aminopeptidase (EC 3.4.11.-)	100811437 GLYMA_04G053300	29.9919	30.0827	29.7061	29.6241	29.8292	29.6537	29.9151	29.7676	29.6239	29.6011	29.5792	29.607	29.4617	29.5659	29.4967	29.7179	29.8375	29.0923	29.1169	29.4703	29.4142	29.4981	29.4681		binding;catalytic activity;cation binding;hydrolase activity;ion binding;metal ion binding;metallopeptidase activity;peptidase activity;peptidase activity, acting on L-amino acid peptides;transition metal ion binding;zinc ion binding		+	23	23	23	28.3	28.3	28.3	98.596	0	162.09	17434000000	169	2.98431	0.00798862
K7LRA3;A0A0R0HT29	Uncharacterized protein	100813585 GLYMA_11G204700	27.2032	27.0019	26.7388	26.9658	27.1985	27.1183	25.8489	26.8429	27.1074	26.039	26.0377	25.9738	25.9135	26.0196	25.9841	25.8917	26.3364	26.2081	26.2278	26.5002	26.3566	26.2922	26.3442		adenyl nucleotide binding;adenyl ribonucleotide binding;ATP binding;binding;catalytic activity;kinase activity;nucleotide binding;phosphotransferase activity, alcohol group as acceptor;protein kinase activity;protein serine/threonine kinase activity;purine nucleotide binding;purine ribonucleoside triphosphate binding;purine ribonucleotide binding;ribonucleotide binding;transferase activity;transf…		+	5	5	4	8.1	8.1	6.7	71.469	0	9.8993	1941900000	21	2.98294	0.00798862
I1LQ02;I1LQ03	WBb225L1.16 protein	WBb225L1.16 100775301 GLYMA_12G040200	27.2072	27.7509	26.3245	27.079	27.2446	27.3706	26.1842	25.9452	25.3232	26.0816	26.113	26.4019	26.607	26.2876	25.9901	25.9104	25.0521	25.711	26.1986	25.6112	25.7255	26.048	26.0956				+	7	7	1	17.1	17.1	3.1	61.447	0	46.692	1915200000	46	2.9789	0.00803203
A0A0R0EYN3	Uncharacterized protein	GLYMA_19G145200	25.9591			26.1645	25.7586		26.3357	26.6964	26.7946	26.9861	26.968	26.9583	26.9381	26.9343	26.8789	26.9473	26.8716	27.2758	26.6663	27.1089	27.0649	27.0625					+	3	3	3	8.5	8.5	8.5	39.158	0	5.1121	2080800000	27	2.97055	0.0080629
A0A0R4J4D0;I1LJE6;A0A0R0HGA9;A0A0R0HFW6;C6SW04;I1LJE5	Uncharacterized protein	100795309 GLYMA_11G118800	29.1259	28.7767	29.0111	28.5482	28.5961	28.8127	28.5698	28.6995	28.6797	28.426	28.2458	28.3753	27.9981	28.4892	28.2068	28.2457	28.7032	28.3362	28.3699	28.4506	28.285	28.1334	28.2466	biological regulation;cellular process;cellular response to stimulus;establishment of localization;establishment of protein localization;intracellular signal transduction;protein transport;regulation of biological process;regulation of cellular process;response to stimulus;signal transduction;small GTPase mediated signal transduction;transport	binding;GTP binding;guanyl nucleotide binding;guanyl ribonucleotide binding;nucleotide binding;purine nucleotide binding;purine ribonucleoside triphosphate binding;purine ribonucleotide binding;ribonucleotide binding		+	10	10	8	58.3	58.3	49	23.052	0	130.52	7817200000	109	2.97224	0.0080629
I1KH50;I1KVA8;I1M5Q4;I1MCJ2	ADP,ATP carrier protein	100793284 GLYMA_07G033100	25.2285	24.8551	25.0077	24.8568		25.4566	25.3112	25.502	25.6467	25.8989	25.6801	25.7496	26.1201	25.549	25.9172	25.9697	25.9724	25.8191	26.1368		25.9369	26.1852			active transmembrane transporter activity;adenyl nucleotide binding;adenyl ribonucleotide binding;antiporter activity;ATP binding;ATP:ADP antiporter activity;binding;nucleotide binding;purine nucleotide binding;purine ribonucleoside triphosphate binding;purine ribonucleotide binding;ribonucleotide binding;secondary active transmembrane transporter activity;solute:solute antiporter activity;transm…	cell part;integral to membrane;intrinsic to membrane;membrane part	+	4	4	4	5.3	5.3	5.3	67.758	0	9.7782	1056700000	23	2.97172	0.0080629
I1MJL6	Uncharacterized protein	100784101 GLYMA_15G271300	29.542	29.4455	29.7648	29.5981	29.1961	29.4859	29.1465	29.0906	29.3293	29.11	28.7421	27.9799	28.589	29.1218	29.0616	28.9747	28.7985	28.53	28.0437	28.3646	28.6249	28.0741	28.7301	biosynthetic process;cellular biosynthetic process;cellular macromolecule biosynthetic process;cellular macromolecule metabolic process;cellular metabolic process;cellular process;cellular protein metabolic process;macromolecule biosynthetic process;macromolecule metabolic process;metabolic process;primary metabolic process;protein metabolic process;translation	structural constituent of ribosome;structural molecule activity	cell part;cytoplasmic part;intracellular non-membrane-bounded organelle;intracellular organelle;intracellular part;macromolecular complex;non-membrane-bounded organelle;organelle;ribonucleoprotein complex;ribosome	+	8	8	2	32.8	32.8	11.6	25.931	0	103.64	10905000000	108	2.97366	0.0080629
I1LQF8;Q08IT7;I1LQF7	Uncharacterized protein	GLYMA_12G053800	27.8544	28.51	28.3994	27.8426	27.6981	28.4682	25.725	26.8371	27.2708	26.4452	27.1673	26.2324	27.2934	26.4923	25.8633	26.6469	26.4799	27.3937	26.9731	27.3496	27.2934	27.0748	27.411	carbohydrate metabolic process;metabolic process;primary metabolic process	catalytic activity;hydrolase activity;hydrolase activity, acting on glycosyl bonds;hydrolase activity, hydrolyzing O-glycosyl compounds	cell part;cell wall;external encapsulating structure	+	6	6	6	17	17	17	49.084	0	218.4	3512100000	46	2.96345	0.00816466
I1N1X2;K7MSH4;A0A097PLY8	Uncharacterized protein	100778091 GLYMA_18G155900	26.3618	26.5195	26.1957	26.0693	26.2076	26.3264	26.1479	25.93	25.7855	26.5447	26.3027	26.4009	26.3255	26.4641	25.9937	26.2018		26.5802	26.6795	26.7872	26.4691	26.8077	26.4014		adenyl nucleotide binding;adenyl ribonucleotide binding;ATP binding;binding;catalytic activity;helicase activity;hydrolase activity;hydrolase activity, acting on acid anhydrides;hydrolase activity, acting on acid anhydrides, in phosphorus-containing anhydrides;nucleic acid binding;nucleoside-triphosphatase activity;nucleotide binding;purine nucleotide binding;purine ribonucleoside triphosphate bi…		+	8	8	4	22.3	22.3	13.5	54.279	0	62.427	1755000000	59	2.95574	0.00827952
C6T4J5;A0A0R4J629	Uncharacterized protein		33.8609	33.6386	33.8435	33.6157	33.8533	33.4314	32.6596	33.6856	32.8794	32.2636	32.6234	32.2948	32.3603	32.4164	32.4145	33.0063	32.9729	32.0442	32.1761	32.8849	32.6148	31.7568	32.986		transporter activity	cell part;integral to membrane;intrinsic to membrane;membrane part	+	2	2	1	6.8	6.8	6.8	25.228	0	104.84	179480000000	150	2.95015	0.00835503
I1MI23;A0A0R0KJG4;A0A0R0K8E0;I1N1N5	Uncharacterized protein	100779628 GLYMA_15G207200	25.0502	25.2877		25.0999	25.0503	25.2218	24.9572	25.3743	25.3007	26.2765	25.7999	25.4602	25.0214	24.9578	25.1989	25.3114		25.7812	25.9716	25.6915	25.5805	25.664	25.7598		catalytic activity		+	6	6	6	9.3	9.3	9.3	81.67	0	23.531	928000000	32	2.94683	0.00838754
A0A0R4J3P1;K7L0W4	Glutamine synthetase (EC 6.3.1.2)	100817922 GLYMA_07G104500	30.7131	30.3054	30.567	30.6525	30.5844	30.677	30.9482	31.3063	31.3416	31.48	31.5057	30.9335	31.324	31.092	31.3129	31.1334	31.5842	31.3017	31.1327	31.4863	31.4746	31.0276	31.5715	amine biosynthetic process;amine metabolic process;biosynthetic process;carboxylic acid biosynthetic process;carboxylic acid metabolic process;cellular amine metabolic process;cellular amino acid biosynthetic process;cellular amino acid metabolic process;cellular biosynthetic process;cellular ketone metabolic process;cellular metabolic process;cellular nitrogen compound biosynthetic process;cellu…	acid-ammonia (or amide) ligase activity;adenyl nucleotide binding;adenyl ribonucleotide binding;ammonia ligase activity;ATP binding;binding;catalytic activity;glutamate-ammonia ligase activity;ligase activity;ligase activity, forming carbon-nitrogen bonds;nucleotide binding;purine nucleotide binding;purine ribonucleoside triphosphate binding;purine ribonucleotide binding;ribonucleotide binding		+	21	21	2	42.7	42.7	2.8	39.148	0	323.31	49198000000	407	2.93499	0.00858718
I1LDV5;A0A0R0I5G1	Uncharacterized protein	100798111 GLYMA_10G239500	28.2352	28.2704	27.7339	27.6335	27.975	27.9254	27.4569	27.493	27.4379	27.9271	27.7912	27.5085	27.5343	27.7622	27.0313	27.4168	26.7161	27.2657	27.2672	26.9392	27.6079	27.5751	27.1356	amine metabolic process;amino acid activation;carboxylic acid metabolic process;cellular amine metabolic process;cellular amino acid metabolic process;cellular ketone metabolic process;cellular macromolecule metabolic process;cellular metabolic process;cellular nitrogen compound metabolic process;cellular process;macromolecule metabolic process;metabolic process;ncRNA metabolic process;nitrogen c…	adenyl nucleotide binding;adenyl ribonucleotide binding;aminoacyl-tRNA editing activity;aminoacyl-tRNA ligase activity;ATP binding;binding;carboxylic ester hydrolase activity;catalytic activity;hydrolase activity;hydrolase activity, acting on ester bonds;ligase activity;ligase activity, forming aminoacyl-tRNA and related compounds;ligase activity, forming carbon-oxygen bonds;nucleotide binding;pu…		+	15	15	15	17.3	17.3	17.3	120.3	0	138.14	4447000000	72	2.91142	0.00903214
C6TID5;C6TAH8	Uncharacterized protein	100790578 GLYMA_11G048200	25.7398	25.5207	25.6842			26.3029		25.6049	25.549	26.2781	25.8899		25.8459	25.9135	26.6026	26.0212	26.289	26.2925	26.3808	26.3379	26.3407	26.299		cellular process;establishment of localization;transmembrane transport;transport		cell part;cytoplasmic part;intracellular organelle part;intracellular part;membrane;mitochondrial membrane;mitochondrial outer membrane;mitochondrial part;organelle membrane;organelle outer membrane;organelle part;outer membrane	+	2	2	2	7.6	7.6	7.6	29.208	0	3.8952	1303700000	15	2.90444	0.00914445
C6SXX0;Q5QJB6;A0A0R0I2J7	Uncharacterized protein		26.5337	26.5187	26.4783	26.4976	26.9795	26.8924	26.8467	26.948	26.8764	27.154	27.1678	26.7407	27.3307	27.0891	27.1353	27.0354	27.1079	27.3101	27.1819	27.0507	26.9793	27.1815	27.334				+	6	6	6	29	29	29	28.102	0	36.609	2719000000	40	2.89667	0.00923538
I1KUU5	Protein ROOT HAIR DEFECTIVE 3 homolog (EC 3.6.5.-) (Protein SEY1 homolog)	100780006 GLYMA_08G193200	26.7353	26.3754	26.1024	26.8573	26.0537	26.3506	26.1734	26.0847	25.5327	26.9766	26.9044	26.7543	26.6836	26.3028	26.3755	26.0837	25.6105	26.948	26.9973	26.908	26.8609	27.1588	27.2447		binding;catalytic activity;GTP binding;GTPase activity;guanyl nucleotide binding;guanyl ribonucleotide binding;hydrolase activity;hydrolase activity, acting on acid anhydrides;hydrolase activity, acting on acid anhydrides, in phosphorus-containing anhydrides;nucleoside-triphosphatase activity;nucleotide binding;purine nucleotide binding;purine ribonucleoside triphosphate binding;purine ribonucleo…	cell part;cytoplasmic part;endoplasmic reticulum membrane;endoplasmic reticulum part;integral to membrane;intracellular organelle part;intracellular part;intrinsic to membrane;membrane;membrane part;organelle membrane;organelle part	+	11	11	3	16.5	16.5	5	89.581	0	47.036	2112000000	73	2.8958	0.00923538
I1ME54;C6T1I7	Uncharacterized protein	100806194 GLYMA_15G062500							25.8906	26.2586	25.8541	28.1617	27.4732	28.0515	27.5898	26.756	27.6768	26.9684	26.4724	28.0851	28.1072	27.6375	27.388	27.2751	27.9926			extracellular region	+	3	3	3	37.2	37.2	37.2	17.683	0	164.25	2713400000	42	2.89532	0.00923538
I1KW54;C6SY93	Uncharacterized protein	GLYMA_08G235400	26.1854			26.0781	26.3864	26.3866	27.6534	28.2595	27.27	29.6771	29.1075	28.04	28.2488	29.0396	29.0327	28.898	30.4279	29.7891	29.2885	27.6713	29.6096	28.8353	29.7894		endopeptidase inhibitor activity;endopeptidase regulator activity;enzyme inhibitor activity;enzyme regulator activity;peptidase inhibitor activity;peptidase regulator activity		+	6	5	5	40.4	36	36	22.906	0	196.94	12154000000	153	2.89117	0.00928997
I1N8L7	Uncharacterized protein	100787734 GLYMA_19G124600	27.8405	27.2874	27.602	26.5533	26.846	27.32	26.4876		26.5377		26.1539				26.1391	25.9985	26.1678				26.6705			alcohol metabolic process;arabinose metabolic process;carbohydrate metabolic process;cellular carbohydrate metabolic process;cellular metabolic process;cellular process;L-arabinose metabolic process;metabolic process;monosaccharide metabolic process;pentose metabolic process;primary metabolic process;small molecule metabolic process	alpha-N-arabinofuranosidase activity;catalytic activity;hydrolase activity;hydrolase activity, acting on glycosyl bonds;hydrolase activity, hydrolyzing O-glycosyl compounds		+	6	6	5	12.1	12.1	10.1	72.066	0	64.362	1521900000	16	2.88367	0.00941726
I1MR18;C6T4T2;B0M195	Uncharacterized protein	100170726 GLYMA_17G009400	26.8373	26.7184	27.1647	27.0521	26.8975	26.7295	27.6227	27.5257	27.5811	27.3516	27.5668	27.6522	27.7063	27.3868	27.1803	27.4669	27.8355	27.4885	27.3825	27.1808	27.389	27.451	27.6134		catalytic activity;oxidoreductase activity		+	7	7	7	40.9	40.9	40.9	21.324	0	97.067	3586600000	82	2.87896	0.00946518
I1MSR7;C6TEX4	Uncharacterized protein	100797369 GLYMA_17G064100	26.2153	26.1018	26.6024	26.5477	26.5282	26.4196	26.6629	26.5139	26.3843	26.4819	26.8298	26.4878	26.7351	26.8917	26.8604	26.737	26.9837	27.1922	27.32	26.7612	27.1186	27.0439	26.8448	cellular process;establishment of localization;transmembrane transport;transport		cell part;cytoplasmic part;intracellular organelle part;intracellular part;membrane;mitochondrial membrane;mitochondrial outer membrane;mitochondrial part;organelle membrane;organelle outer membrane;organelle part;outer membrane	+	7	7	2	30	30	6.1	29.961	0	16.246	2255200000	51	2.87831	0.00946518
C6TIW1;I1JFB7;C6T8Y1	Uncharacterized protein	100798090 GLYMA_02G148400	28.4396	28.2387	28.2183	28.7837	28.5399	28.4848	28.8587	28.6651	29.1336	28.9724	28.9981	28.9081	28.6934	28.5977	28.8064	28.7992	29.1411	28.9203	29.0783	29.0961	28.9613	29.2655	28.7226	biosynthetic process;metabolic process	catalytic activity		+	4	4	4	19.9	19.9	19.9	32.559	0	25.236	9784100000	139	2.8733	0.00954036
A8C8H3;I1LM82;Q7XJB3	Glutamate decarboxylase (EC 4.1.1.15)	GAD	30.1382	30.3281	30.2483	29.8396	30.1804	29.9392	29.8889	29.032	29.3382	29.8221	29.4588	29.7882	29.8989	29.7551	29.5184	29.476	29.0907	29.2714	29.6118	29.3771	29.2876	29.5162	29.37	amine metabolic process;carboxylic acid metabolic process;cellular amine metabolic process;cellular amino acid metabolic process;cellular ketone metabolic process;cellular metabolic process;cellular nitrogen compound metabolic process;cellular process;glutamate metabolic process;glutamine family amino acid metabolic process;metabolic process;nitrogen compound metabolic process;organic acid metabo…	binding;carbon-carbon lyase activity;carboxy-lyase activity;catalytic activity;cofactor binding;glutamate decarboxylase activity;lyase activity;pyridoxal phosphate binding;vitamin B6 binding;vitamin binding		+	13	13	2	30.8	30.8	6.4	57.175	0	323.31	19299000000	207	2.86621	0.00962783
I1N3G2;I1L6T4	Uncharacterized protein	100780407 GLYMA_18G222200	25.7575	26.3532	26.6161	26.025	26.7079	26.0295	25.4893	25.6319	25.5495	25.4048	25.3161	25.4043	25.7252		25.7013	25.332		25.1946	25.2773		25.1314	25.2476	25.4144				+	4	4	4	12	12	12	42.488	0	8.0449	1058300000	12	2.86638	0.00962783
A0A0R0HN38;C6TIC3;A0A0R0LK87	Uncharacterized protein	100812711 GLYMA_11G023200	26.6565	26.4733	26.2783	25.7153	26.0059	27.4108	24.103	24.7359	25.4333		23.7009		23.9311		24.3092	24.3133	23.0755	23.599			23.9354		23.2864		transporter activity	cell part;integral to membrane;intrinsic to membrane;membrane part	+	6	4	4	23.4	14.5	14.5	28.86	0	12.079	756650000	26	2.86346	0.00964855
I1JAV9	Pectinesterase (EC 3.1.1.11)	100815836 GLYMA_01G240300	27.8022	28.6072	27.9444	28.7103	28.3148	28.1619	28.2091	28.4987	29.1798	28.6938	29.1978	29.0704	29.134	29.3036	29.6872	29.1334	30.4108	29.7674	29.4978	29.2814	29.5395	29.0411	29.6781	carbohydrate catabolic process;carbohydrate metabolic process;catabolic process;cell wall macromolecule metabolic process;cell wall modification;cell wall organization;cell wall organization or biogenesis;cell wall pectin metabolic process;cell wall polysaccharide metabolic process;cellular carbohydrate catabolic process;cellular carbohydrate metabolic process;cellular component organization or b…	aspartyl esterase activity;carboxylic ester hydrolase activity;catalytic activity;enzyme inhibitor activity;enzyme regulator activity;hydrolase activity;hydrolase activity, acting on ester bonds;pectinesterase activity	cell part;cell wall;cytoplasmic part;cytosol;external encapsulating structure;intracellular organelle part;intracellular part;membrane;organelle membrane;organelle part;vacuolar membrane;vacuolar part	+	7	7	7	16.3	16.3	16.3	61.06	0	88.798	10790000000	88	2.86203	0.00964855
I1NEH6;I1LAJ3	Uncharacterized protein	100807722 GLYMA_20G077200	27.5007	27.3119	27.6982	26.6234	26.4604	26.9938	26.6112	26.6377	26.7739	27.1567	26.6779	26.606	25.9603	26.6339	26.6514	26.354	26.7169	26.2017	26.1502	26.6561	26.3561		26.4553				+	4	4	4	18.6	18.6	18.6	36.617	0	48.156	3161300000	62	2.86064	0.00964855
I1K7Q8;C6TB90;A0A0R0JHQ6;A0A0R0JB89	Uncharacterized protein	100813308 GLYMA_06G030900	28.0263	28.0104	28.0092	28.1816	27.6583	27.4343	27.8887	26.9991	27.0493	26.9135	26.5603	27.3468	26.9972	26.9117	27.0468	26.9946	26.3509	26.7001	26.4279	26.8464	26.6002	27.1871	26.5695				+	8	7	7	25.5	22.3	22.3	34.217	0	16.091	3341600000	45	2.85778	0.00967787
C6T763;I1K2Z9	Uncharacterized protein	100785835 GLYMA_05G127300	25.005	25.5813	24.6977	24.6792	24.5226		24.4403	24.4196	24.563	24.3907	24.2651	24.1666	23.9571		23.8247	23.8367			24.0489	23.7541	24.2342		24.379	macromolecule metabolic process;metabolic process;primary metabolic process;protein metabolic process;proteolysis		cell part;intracellular part;macromolecular complex;proteasome regulatory particle;protein complex	+	3	3	1	13.9	13.9	3.4	30.806	0	13.981	416680000	9	2.84395	0.00995365
I1MXD1;I1M903	Uncharacterized protein	100782717 GLYMA_17G230300	27.1438	26.4359	26.5212	26.7206	26.5104	26.7349	25.5776	26.4337	25.3638	26.4743	26.62	26.5952	26.4413	26.5458		25.6506	25.3736	26.3843	26.2269	26.3934	26.5574	26.8198	26.8429		binding;nucleic acid binding;RNA binding		+	6	6	6	12.4	12.4	12.4	69.188	0	40.197	1962200000	59	2.84252	0.00995365
Q00M88	N-hydroxycinnamoyl/benzoyltransferase 2	100795679 GLYMA_04G040400	27.7349	27.1843	26.8751	27.0024	27.0916	27.3449	27.4768	27.5914	27.7777	27.8391	27.9023	28.1878	27.7536	27.909	27.8278	27.901	28.7562	28.3777	28.2172	28.4274	28.0209	27.7175	28.2652		catalytic activity;transferase activity;transferase activity, transferring acyl groups;transferase activity, transferring acyl groups other than amino-acyl groups		+	7	7	6	19.8	19.8	17.2	51.666	0	22.792	4756200000	100	2.83358	0.0101252
I1JAD1;A0A0R0HB25;K7LMK6	Uncharacterized protein	GLYMA_01G225200	27.5858	27.8907	27.9533	27.6217	27.7376	27.6172	27.7046	27.543	27.5278	27.4875	27.3052	27.0866	27.1736	27.1925	27.2635	27.1264	26.752	27.3323	26.7535	27.19	27.4159	27.1126	27.3438		catalytic activity		+	9	9	9	16.5	16.5	16.5	75.365	0	31.858	3693900000	72	2.8283	0.0101778
I1MDC4;I1M4Y9	Uncharacterized protein	100776079 GLYMA_15G035600	28.1394	27.9542	27.8027	28.4123	28.0284	28.4821	28.5088	28.4093	28.2856	28.4603	28.5966	28.5177	28.3777	28.4921	28.4869	28.5883	28.2378	28.653	28.5518	28.6695	28.4977	28.6049	28.5422	establishment of localization;establishment of localization in cell;establishment of protein localization;intracellular protein transport;intracellular transport;protein transport;transport	active transmembrane transporter activity;macromolecule transmembrane transporter activity;P-P-bond-hydrolysis-driven protein transmembrane transporter activity;P-P-bond-hydrolysis-driven transmembrane transporter activity;primary active transmembrane transporter activity;protein transmembrane transporter activity;protein transporter activity;substrate-specific transmembrane transporter activity;…	cell part;membrane;outer membrane	+	11	11	11	18.4	18.4	18.4	86.811	0	82.166	7465200000	124	2.8297	0.0101778
I1KHQ7	Uncharacterized protein	100787286 GLYMA_07G050900	27.6101	27.9114	27.6269		27.5086	27.954	28.1786	27.8784	27.6819	28.3478	28.2078	28.1343	28.1913	27.9904	28.6393	28.2898		28.8694		28.4921	28.5967	28.4846	28.2902		binding;catalytic activity;coenzyme binding;cofactor binding;D-arabinono-1,4-lactone oxidase activity;flavin adenine dinucleotide binding;oxidoreductase activity;oxidoreductase activity, acting on CH-OH group of donors;oxidoreductase activity, acting on the CH-OH group of donors, NAD or NADP as acceptor;oxidoreductase activity, acting on the CH-OH group of donors, oxygen as acceptor;UDP-N-acetylm…	cell part;membrane	+	5	3	3	9.6	4.1	4.1	65.004	0	6.1691	6436400000	11	2.82028	0.0103316
I1KVR2;I1KGP0;C6SW70;C6TB24	Uncharacterized protein	100813342 GLYMA_08G222100	29.5109	29.7031	29.4528	29.9639	30.0496	29.2438	29.4164	29.1978	29.3496	29.3489	29.2952	29.2981	29.0664	28.5332	29.3665	29.2437	29.4796	28.6387	29.0563	29.03	28.7915	28.9686	28.9972			cell part;cytoplasmic part;intracellular non-membrane-bounded organelle;intracellular organelle;intracellular part;macromolecular complex;non-membrane-bounded organelle;organelle;ribonucleoprotein complex;ribosome	+	9	9	4	33.7	33.7	18.1	28.322	0	36.853	13615000000	123	2.80826	0.010585
I1J5B4	Uncharacterized protein	100812652 GLYMA_01G032500	28.8153	28.8873	28.6739	28.8631	28.5431	28.4512	28.7123	28.4691	28.4403	28.3809	28.7161	28.4452	28.7609	28.5859	28.1571	28.2736	28.0991	28.2809	28.3792	28.2532	28.3552	28.4992	28.2672	amine metabolic process;amino acid activation;carboxylic acid metabolic process;cellular amine metabolic process;cellular amino acid metabolic process;cellular ketone metabolic process;cellular macromolecule metabolic process;cellular metabolic process;cellular nitrogen compound metabolic process;cellular process;macromolecule metabolic process;metabolic process;ncRNA metabolic process;nitrogen c…	adenyl nucleotide binding;adenyl ribonucleotide binding;aminoacyl-tRNA ligase activity;ATP binding;binding;catalytic activity;ligase activity;ligase activity, forming aminoacyl-tRNA and related compounds;ligase activity, forming carbon-oxygen bonds;nucleotide binding;purine nucleotide binding;purine ribonucleoside triphosphate binding;purine ribonucleotide binding;ribonucleotide binding;threonine…	cell part;cytoplasm;intracellular part	+	17	17	6	25.7	25.7	8.2	82.309	0	96.73	8075200000	118	2.79643	0.0108399
I1J8T0;O48601	Uncharacterized protein	GLYMA_01G172600	27.0721	26.253	26.7869	27.1321	26.949		27.7044	27.0166	27.3614	28.0175	27.7189	27.5385	27.7691	27.7057	27.5245	27.679	27.3277	27.622	27.5129	27.7342	27.545	27.6224	27.545				+	17	6	5	62.9	23.3	20.8	35.574	0	163.25	3005400000	40	2.79278	0.0108664
K7KEW2	Uncharacterized protein	100804856 GLYMA_03G137100	28.2846	27.9437	27.9831	28.1882	28.0067	28.0363	28.3916	28.2449	28.3099	28.4751	28.5137	28.5743	28.3463	28.4752	28.0857	28.2426	28.0328	28.1542	28.2191	28.393	28.4673	28.7021	28.3233		binding;catalytic activity;cation binding;endopeptidase activity;hydrolase activity;ion binding;metal ion binding;metalloendopeptidase activity;metallopeptidase activity;peptidase activity;peptidase activity, acting on L-amino acid peptides		+	15	15	8	15.7	15.7	7.1	111.56	0	30.085	7137800000	56	2.79239	0.0108664
I1N5E4;C6TLV4;K7MVK2	Uncharacterized protein	100816075 GLYMA_18G299100	29.5855	29.6525	29.6534	30.0042	29.6363	29.3514	30.087	30.1803	30.0016	29.8752	29.8782	30.1109	30.1633	30.0483	30.1389	30.1087	30.1015	30.1636	30.6594	30.1822	30.1087	30.239	30.1757	alcohol catabolic process;alcohol metabolic process;carbohydrate catabolic process;carbohydrate metabolic process;catabolic process;cellular carbohydrate catabolic process;cellular carbohydrate metabolic process;cellular metabolic process;cellular nitrogen compound metabolic process;cellular process;coenzyme metabolic process;cofactor metabolic process;glucose catabolic process;glucose metabolic …	catalytic activity;sedoheptulose-7-phosphate:D-glyceraldehyde-3-phosphate glyceronetransferase activity;transferase activity;transferase activity, transferring aldehyde or ketonic groups	cell part;cytoplasm;intracellular part	+	16	16	2	41.7	41.7	3.9	48.062	0	323.31	22605000000	154	2.78991	0.0108915
I1MU36;Q6YGT9;I1MU35	Purple acid phosphatase (EC 3.1.3.2)	547708 GLYMA_17G109400	27.6548	27.2946	27.3131	27.7948	27.703	26.9246	28.5372	28.2242	28.2277	28.6549	28.1437	28.1512	28.2851	28.3774	28.4642	28.6335	28.0969	28.6438	28.7808	28.0429	28.4502	28.243	28.0613		acid phosphatase activity;binding;catalytic activity;cation binding;hydrolase activity;hydrolase activity, acting on ester bonds;ion binding;metal ion binding;phosphatase activity;phosphoric ester hydrolase activity		+	6	6	6	20.4	20.4	20.4	56.721	0	114.6	6173800000	64	2.78261	0.0110386
I1KLQ5;I1M057;I1KLQ4	Uncharacterized protein	100796442 GLYMA_07G202100	28.734	29.2901	29.0933	28.5139	28.9872	28.4422	28.3282	28.4265	27.9912	28.3765	28.229	28.4071	27.805	28.4237	27.8267	27.9325	27.5098	28.4168	28.1472	28.2138	28.504	27.7216	28.0025		binding;catalytic activity;GTP binding;GTPase activity;guanyl nucleotide binding;guanyl ribonucleotide binding;hydrolase activity;hydrolase activity, acting on acid anhydrides;hydrolase activity, acting on acid anhydrides, in phosphorus-containing anhydrides;nucleoside-triphosphatase activity;nucleotide binding;purine nucleotide binding;purine ribonucleoside triphosphate binding;purine ribonucleo…		+	10	10	10	11.7	11.7	11.7	117.15	0	211.36	7103200000	58	2.77184	0.0112777
A0A0R0HP07;A0A097PJB6;I1LYK3	Structural maintenance of chromosomes protein	GLYMA_10G037300	26.3416	26.7369	26.3275	26.7205	26.9172	26.905	26.3896	26.7162	26.7996	26.2122	26.3044	25.7897	25.9266	26.0811	26.1309	26.2019	26.3168	26.1099	26.2214	26.5236	26.348	25.8856	26.025	cell cycle process;cellular component organization;cellular component organization at cellular level;cellular component organization or biogenesis;cellular component organization or biogenesis at cellular level;cellular process;chromosome organization;mitotic sister chromatid cohesion;organelle organization;sister chromatid cohesion	adenyl nucleotide binding;adenyl ribonucleotide binding;ATP binding;binding;chromatin binding;nucleotide binding;purine nucleotide binding;purine ribonucleoside triphosphate binding;purine ribonucleotide binding;ribonucleotide binding	cell part;chromosomal part;cohesin complex;intracellular membrane-bounded organelle;intracellular organelle;intracellular organelle part;intracellular part;macromolecular complex;membrane-bounded organelle;nucleus;organelle;organelle part;protein complex	+	8	8	8	5.9	5.9	5.9	124.76	0	80.036	1879500000	27	2.76565	0.0114011
I1JGA0	Calcium-transporting ATPase (EC 3.6.3.8)	100791934 GLYMA_02G186100	27.1893	27.1829	27.5334	26.7682	26.7857	27.0127	26.9313	27.0999	27.1049	26.7174	26.2318	26.6547	26.0835	26.3773	26.3182	26.5468	26.3217	26.0177		26.7303	26.4325	26.8702	26.2		active transmembrane transporter activity;adenyl nucleotide binding;adenyl ribonucleotide binding;ATP binding;ATPase activity;ATPase activity, coupled;ATPase activity, coupled to movement of substances;ATPase activity, coupled to transmembrane movement of ions;ATPase activity, coupled to transmembrane movement of ions, phosphorylative mechanism;ATPase activity, coupled to transmembrane movement o…	cell part;integral to membrane;intrinsic to membrane;membrane part	+	8	4	4	10.9	6.3	6.3	113.96	0	20.995	2210000000	30	2.75319	0.0116664
I1JGU8;K7M7P5;I1JGU9	Phospho-2-dehydro-3-deoxyheptonate aldolase (EC 2.5.1.54)	100797019 GLYMA_02G208400	26.9036	27.1164	27.5798	28.1244	27.8796	27.5032	28.7164	28.4474	28.7556	27.9237	28.3532	28.3251	28.8877	28.7687	28.0852	28.7336	27.6817	28.3249	28.4479	28.2444	28.0935	29.2747	28.5198	amine biosynthetic process;amine metabolic process;aromatic amino acid family biosynthetic process;aromatic amino acid family metabolic process;aromatic compound biosynthetic process;biosynthetic process;carboxylic acid biosynthetic process;carboxylic acid metabolic process;cellular amine metabolic process;cellular amino acid biosynthetic process;cellular amino acid metabolic process;cellular aro…	3-deoxy-7-phosphoheptulonate synthase activity;catalytic activity;transferase activity;transferase activity, transferring alkyl or aryl (other than methyl) groups		+	14	14	10	38.7	38.7	30.1	59.01	0	45.391	7759700000	93	2.75274	0.0116664
A0A0R0HCC8	Uncharacterized protein	100804509 GLYMA_11G051800				25.3926	25.2374		26.518	27.2264	27.6378	28.1907	27.7505	27.234	27.3589	27.0652	27.7795	27.4965	26.7409	26.9956	27.2906	28.0568	27.7998	27.5792	27.515		binding;catalytic activity;cation binding;heme binding;ion binding;iron ion binding;metal ion binding;oxidoreductase activity;oxidoreductase activity, acting on paired donors, with incorporation or reduction of molecular oxygen;tetrapyrrole binding;transition metal ion binding		+	8	8	8	16.9	16.9	16.9	56.225	0	21.799	2959400000	42	2.75018	0.0116962
I1L6M4;K7MU75	Uncharacterized protein	100818163 GLYMA_09G262000	25.5789	25.6858		26.0023	25.9765	25.9311	25.94	25.8832	26.136	25.9989	26.0774	26.2589	26.1196	26.0673	25.8747	26.0727	25.9514	26.096	26.3154	26.0251	26.3219	26.1276	26.2059	cation transport;establishment of localization;ion transport;metal ion transport;monovalent inorganic cation transport;potassium ion transport;transport	active transmembrane transporter activity;antiporter activity;cation transmembrane transporter activity;hydrogen ion transmembrane transporter activity;inorganic cation transmembrane transporter activity;ion transmembrane transporter activity;monovalent inorganic cation transmembrane transporter activity;secondary active transmembrane transporter activity;solute:cation antiporter activity;solute:…	cell part;integral to membrane;intrinsic to membrane;membrane part	+	5	5	4	5.1	5.1	4.1	129.2	0	48.237	1372500000	26	2.74832	0.0117075
C6SYQ9;A0A0R0ETG1	Peptidyl-prolyl cis-trans isomerase (PPIase) (EC 5.2.1.8)		27.9008	27.7593	27.764	28.0685	28.2076	28.0415	28.404	28.206	27.8377	28.2044	28.2593	28.6244	28.6503	28.5317	28.295	28.4331	28.3328	28.4117	28.3304	28.2027	28.3362	28.3307	28.1771	cellular macromolecule metabolic process;cellular metabolic process;cellular process;cellular protein metabolic process;macromolecule metabolic process;metabolic process;primary metabolic process;protein folding;protein metabolic process	catalytic activity;cis-trans isomerase activity;isomerase activity;peptidyl-prolyl cis-trans isomerase activity		+	7	7	5	44	44	34.9	18.983	0	71.047	6640400000	119	2.73884	0.0118868
I1KAD3	Uncharacterized protein	100791865 GLYMA_06G116200	27.9581	27.5644	28.2412	28.0047	27.5596	27.5507	28.4396	27.7682	28.3941	28.1103	28.5378	28.3737	28.4158	28.6555	28.62	28.4702	28.8665	29.039	29.1301	28.7302	28.3105	28.3356	27.6505				+	11	11	11	27.7	27.7	27.7	79.93	0	79.011	7181700000	157	2.7392	0.0118868
I1JFF0	Peroxidase (EC 1.11.1.7)	100806595 GLYMA_02G151700	28.0334	27.408	27.7695	27.1932	27.0759	27.0086	27.058	27.0257	27.2593	27.1333	26.766	26.7163	26.854	27.0354	26.9312	27.276	27.7172	26.8956	26.5698	26.8797	26.7163	26.5259	26.9102	response to chemical stimulus;response to oxidative stress;response to stimulus;response to stress	antioxidant activity;binding;catalytic activity;cation binding;heme binding;ion binding;iron ion binding;metal ion binding;oxidoreductase activity;oxidoreductase activity, acting on peroxide as acceptor;peroxidase activity;tetrapyrrole binding;transition metal ion binding	extracellular region	+	8	4	4	35.1	19.6	19.6	35.25	0	61.325	3179000000	52	2.73423	0.011974
K7KL81	Uncharacterized protein	100788998 GLYMA_04G197900	26.6642	26.7548	25.2219	26.5992	25.9107	25.5319	24.5808	24.8003		24.7641	25.0286	24.5637	24.9766	24.6141	24.3769	24.588	24.7821	24.4513	24.309		24.6153	24.3196			binding;DNA binding;nucleic acid binding		+	5	5	2	17	17	8.4	59.519	0	86.592	819470000	25	2.71373	0.0125117
K7LLZ5;A0A0R0ELK1	Mechanosensitive ion channel protein	102665658 GLYMA_10G284300		25.0597		25.1702	24.9477	25.0461	25.4753	25.3603	25.1496	25.9807	25.5521	25.8945	25.6799	25.5085	25.6718	26.0393	25.5163	25.4722	25.1988	25.3381	25.6008	25.5518	25.4286	cellular process;establishment of localization;transmembrane transport;transport		cell part;membrane	+	2	2	2	1.9	1.9	1.9	107.34	0	5.6126	900850000	13	2.71029	0.0125393
I1K3X9	Tubulin alpha chain	732582 GLYMA_05G157300	31.4607	31.8265	31.364	31.7021	31.4811	31.4991	31.52	31.0778	31.0967	30.9585	30.8382	31.2837	31.2061	31.1607	31.0816	30.999	30.6147	30.9269	30.968	30.7048	30.8706	30.8882	30.3064	cellular component assembly;cellular component assembly at cellular level;cellular component organization;cellular component organization at cellular level;cellular component organization or biogenesis;cellular component organization or biogenesis at cellular level;cellular macromolecular complex assembly;cellular macromolecular complex subunit organization;cellular process;cellular protein compl…	binding;catalytic activity;GTP binding;GTPase activity;guanyl nucleotide binding;guanyl ribonucleotide binding;hydrolase activity;hydrolase activity, acting on acid anhydrides;hydrolase activity, acting on acid anhydrides, in phosphorus-containing anhydrides;nucleoside-triphosphatase activity;nucleotide binding;purine nucleotide binding;purine ribonucleoside triphosphate binding;purine ribonucleo…	cell part;cytoskeletal part;intracellular organelle part;intracellular part;macromolecular complex;microtubule;organelle part;protein complex	+	17	17	1	53.2	53.2	6	49.605	0	323.31	50130000000	375	2.70994	0.0125393
I1JLU8;I1J752;P12460;C6TIX6	Tubulin beta chain	100811275 GLYMA_03G074400	27.5719	27.9603	27.4605	28.2073	27.2605	27.5928	27.1803	26.3697	26.9762	26.3568	26.0145	26.7042	27.0245	26.9031	26.978	25.8462		26.6546	26.3006	25.9227	26.1487	26.5456	25.6553	cellular component assembly;cellular component assembly at cellular level;cellular component organization;cellular component organization at cellular level;cellular component organization or biogenesis;cellular component organization or biogenesis at cellular level;cellular macromolecular complex assembly;cellular macromolecular complex subunit organization;cellular process;cellular protein compl…	binding;catalytic activity;GTP binding;GTPase activity;guanyl nucleotide binding;guanyl ribonucleotide binding;hydrolase activity;hydrolase activity, acting on acid anhydrides;hydrolase activity, acting on acid anhydrides, in phosphorus-containing anhydrides;nucleoside-triphosphatase activity;nucleotide binding;purine nucleotide binding;purine ribonucleoside triphosphate binding;purine ribonucleo…	cell part;cytoplasm;cytoskeletal part;intracellular organelle part;intracellular part;macromolecular complex;microtubule;organelle part;protein complex	+	17	2	2	52.6	5.1	5.1	50.612	0	9.5231	2616300000	31	2.70528	0.0125924
Q09WE7;I1JZ10;I1KAF3;A0A0R0JFL0	UDP-sugar pyrophosphorylase 1 (EC 2.7.7.64)	USP1	27.3484	27.1366	27.4221	26.7135	26.7764	27.0331	26.7653	26.7515	26.9087	26.8229	26.8214	26.2388	26.1502	26.8743	26.6769	26.3603	26.3821	26.4459	26.7538		26.2864	26.1289	26.1057		catalytic activity;nucleotidyltransferase activity;transferase activity;transferase activity, transferring phosphorus-containing groups;uridylyltransferase activity;UTP-monosaccharide-1-phosphate uridylyltransferase activity		+	12	12	12	26	26	26	66.125	0	58.475	2233600000	57	2.7065	0.0125924
I1NAH7;A0A0R0EXX1;A0A0R0KSL9;K7KFW9;A0A0R0KLR3;I1JPV5;A0A0R0JYI4	Pyruvate kinase (EC 2.7.1.40)	100781158 GLYMA_19G190100	26.7394	26.9229	26.7374	26.1294	26.3859		26.9208	26.5901	27.0997	26.9959	27.0261	27.1854	26.9473	26.8598	26.6964	26.9129	26.9813		27.232		27.159	27.4589		alcohol catabolic process;alcohol metabolic process;carbohydrate catabolic process;carbohydrate metabolic process;catabolic process;cellular carbohydrate catabolic process;cellular carbohydrate metabolic process;cellular metabolic process;cellular process;generation of precursor metabolites and energy;glucose catabolic process;glucose metabolic process;glycolysis;hexose catabolic process;hexose m…	alkali metal ion binding;binding;catalytic activity;cation binding;ion binding;kinase activity;magnesium ion binding;metal ion binding;phosphotransferase activity, alcohol group as acceptor;potassium ion binding;pyruvate kinase activity;transferase activity;transferase activity, transferring phosphorus-containing groups		+	8	2	1	15.7	4.2	1.7	57.57	0.00035753	3.6139	2559200000	11	2.70254	0.0126312
I1K9P5;C6TKQ1;I1JV52;C6T907	Uncharacterized protein	100775667 GLYMA_06G095300	26.696	27.1651	26.3476	26.0736	26.8388	26.569	26.2007	25.7325	25.3953	25.7611	25.9612	25.7719	25.6089	25.4106		25.5978	25.5627	25.5897	25.829	25.5823			25.7248				+	5	5	5	24.2	24.2	24.2	29.418	0	15.192	1385200000	15	2.69503	0.0127968
K7MMN7	Uncharacterized protein	100778616 GLYMA_17G195100	26.8532	26.9844	27.3265	26.9357	26.8241	26.923	26.7646	26.3373	26.7466	26.522	25.5737	25.9408	26.0056	26.0756	26.3935	25.9917	26.7415	26.3968		25.5779	26.0134	25.7187	25.7192	biosynthetic process;carboxylic acid biosynthetic process;carboxylic acid metabolic process;cellular biosynthetic process;cellular ketone metabolic process;cellular metabolic process;cellular process;L-ascorbic acid biosynthetic process;L-ascorbic acid metabolic process;metabolic process;organic acid biosynthetic process;organic acid metabolic process;oxoacid metabolic process;small molecule bios…	binding;catalytic activity;coenzyme binding;cofactor binding;D-arabinono-1,4-lactone oxidase activity;flavin adenine dinucleotide binding;L-gulonolactone oxidase activity;oxidoreductase activity;oxidoreductase activity, acting on CH-OH group of donors;oxidoreductase activity, acting on the CH-OH group of donors, NAD or NADP as acceptor;oxidoreductase activity, acting on the CH-OH group of donors,…	cell part;membrane	+	8	8	8	14.3	14.3	14.3	66.152	0	17.312	1772000000	30	2.69409	0.0127968
D6PAW7;B3TDK6;P09186	Lipoxygenase (EC 1.13.11.-);Seed linoleate 9S-lipoxygenase-3	Lx3	29.4156	29.2458	29.6329	29.1917	29.6376	29.6276	28.8738	28.7036	29.3895	28.7343	28.7862	28.8433	28.5232	28.9645	29.0247	29.3876	29.8826	28.5651	28.4221	28.5895	29.0202	28.9339	29.1668	biosynthetic process;carboxylic acid biosynthetic process;carboxylic acid metabolic process;cellular biosynthetic process;cellular ketone metabolic process;cellular lipid metabolic process;cellular metabolic process;cellular process;fatty acid biosynthetic process;fatty acid metabolic process;lipid biosynthetic process;lipid metabolic process;metabolic process;monocarboxylic acid metabolic proces…	binding;catalytic activity;cation binding;dioxygenase activity;ion binding;metal ion binding;oxidoreductase activity;oxidoreductase activity, acting on single donors with incorporation of molecular oxygen;oxidoreductase activity, acting on single donors with incorporation of molecular oxygen, incorporation of two atoms of oxygen	cell part;cytoplasm;intracellular part	+	16	10	9	20	13.7	12.5	96.781	0	21.572	12183000000	56	2.68429	0.0130471
I1LMY4;A0A0R0HYB1	Uncharacterized protein	100819821 GLYMA_11G236200	27.1511	26.2794	27.6784	27.8127	26.189	27.3638	26.7438	24.9612	25.7907	25.1338	25.3253	25.5974	25.5175	26.0504	25.3651	24.9999	25.5518	24.9902	24.7517	25.4694	24.962	25.7387	25.1334		binding;catalytic activity;cofactor binding;pyridoxal phosphate binding;transaminase activity;transferase activity;transferase activity, transferring nitrogenous groups;vitamin B6 binding;vitamin binding		+	6	6	6	16.1	16.1	16.1	50.202	0	32.46	1551600000	28	2.66682	0.01342
C6TMV4;A0A0R0JZ42	Uncharacterized protein		24.4456	26.0454	26.1313	24.8089	24.7513	26.007	23.566	24.3601	24.321	23.6788	23.4549	22.695	22.9681	23.426	24.2126		24.0273	23.9005	23.7702	24.1671	23.6149		23.8436		transporter activity	cell part;integral to membrane;intrinsic to membrane;membrane part	+	4	2	2	14.6	7	7	30.868	0	4.8445	513850000	28	2.66693	0.01342
C6T172	Uncharacterized protein	100500267 GLYMA_04G021400	27.7779	27.7496	27.9488	27.9574	28.2316	28.377	28.4877	28.4527	28.086	28.13	28.4762	28.2523	28.8762	28.6326	28.2321	28.3543	28.6391	28.7459	28.3895	28.4684	28.3913	28.3001	28.1436				+	4	4	4	22	22	22	26.731	0	14.16	6988000000	46	2.66581	0.01342
I1LS94	Acyl-coenzyme A oxidase	100780811 GLYMA_12G120300	24.8409	25.3041		25.6097	25.9158		25.8521	26.0508	25.882	26.0459	26.0831	25.6363	26.1627	25.6769	26.1007	26.1626	25.6797	26.6711	26.6002	26.1833	25.8042	26.0007	25.8221	carboxylic acid catabolic process;carboxylic acid metabolic process;catabolic process;cellular catabolic process;cellular ketone metabolic process;cellular lipid catabolic process;cellular lipid metabolic process;cellular metabolic process;cellular process;fatty acid beta-oxidation;fatty acid catabolic process;fatty acid metabolic process;fatty acid oxidation;lipid catabolic process;lipid metabol…	acyl-CoA dehydrogenase activity;acyl-CoA oxidase activity;binding;catalytic activity;coenzyme binding;cofactor binding;flavin adenine dinucleotide binding;oxidoreductase activity;oxidoreductase activity, acting on the CH-CH group of donors;oxidoreductase activity, acting on the CH-CH group of donors, oxygen as acceptor	cell part;cytoplasmic part;intracellular membrane-bounded organelle;intracellular organelle;intracellular part;membrane-bounded organelle;microbody;organelle;peroxisome	+	13	3	3	25.3	6.2	6.2	75.92	0	10.104	1279000000	32	2.66517	0.01342
K7L145	Uncharacterized protein	100797501 GLYMA_07G118300	25.9688	26.3868	26.122	26.3644	26.5281	26.3835	27.4172	26.8361	26.4311	26.8416	26.9243	26.7998	27.3549	27.2693	26.8683	27.4699	27.1977	27.2717	26.5759	26.8797	26.9917	26.9785	27.0906	amine metabolic process;arginine metabolic process;carboxylic acid metabolic process;cellular amine metabolic process;cellular amino acid metabolic process;cellular ketone metabolic process;cellular metabolic process;cellular nitrogen compound metabolic process;cellular process;glutamine family amino acid metabolic process;metabolic process;nitrogen compound metabolic process;organic acid metabol…	binding;catalytic activity;cofactor binding;pyridoxal phosphate binding;transaminase activity;transferase activity;transferase activity, transferring nitrogenous groups;vitamin B6 binding;vitamin binding		+	7	7	3	23.3	23.3	12.2	50.334	0	67.529	2759600000	37	2.66616	0.01342
A0A0R4J364;A0A0R0JL19;A0A0R0JM61;I1KAJ5;Q9ZT38;I1KAJ4;C6TD82	Uncharacterized protein	100783858 GLYMA_04G240800	31.6003	32.1681	31.2231	31.9203	32.8552	32.4705	32.2126	31.4899	31.9264	32.1635	32.9138	33.1233	32.8517	32.7198	33.6151	33.0061	32.6673	33.6386	33.1829	32.9179	33.0889	33.387	32.7281		binding;catalytic activity;cation binding;ion binding;metal ion binding;oxidoreductase activity;transition metal ion binding;zinc ion binding		+	21	21	11	67.6	67.6	45	40.922	0	179.03	148700000000	427	2.66363	0.0134253
I1N4L3	Uncharacterized protein	100815354 GLYMA_18G268300	24.0394		24.0939			24.5621			24.3966		24.7116	24.8923	24.2766	24.9543		24.7677	24.9426	26.3605	26.5401	25.7541					catalytic activity;transferase activity;transferase activity, transferring acyl groups;transferase activity, transferring acyl groups other than amino-acyl groups		+	2	2	2	4	4	4	52.631	0	4.0047	618310000	10	2.65974	0.0134618
Q8L7J5;Q8L7J4;I1N5N0;Q42806;A0A0R0JW56	Pyruvate kinase (EC 2.7.1.40)		27.7995	28.0654	27.4261	28.1616	28.2513	27.8871	28.6664	28.104	28.0084	28.6263	28.84	29.0445	28.7415	28.376	29.1965	28.8389	28.115	28.7157	29.0097	29.0188	28.8135	29.0379	28.8111	alcohol catabolic process;alcohol metabolic process;carbohydrate catabolic process;carbohydrate metabolic process;catabolic process;cellular carbohydrate catabolic process;cellular carbohydrate metabolic process;cellular metabolic process;cellular process;generation of precursor metabolites and energy;glucose catabolic process;glucose metabolic process;glycolysis;hexose catabolic process;hexose m…	adenyl nucleotide binding;adenyl ribonucleotide binding;alkali metal ion binding;ATP binding;binding;catalytic activity;cation binding;ion binding;kinase activity;magnesium ion binding;metal ion binding;nucleotide binding;phosphotransferase activity, alcohol group as acceptor;potassium ion binding;purine nucleotide binding;purine ribonucleoside triphosphate binding;purine ribonucleotide binding;p…	cell part;cytoplasm;intracellular part	+	14	12	12	32.7	28.8	28.8	55.317	0	131.24	9454900000	133	2.66095	0.0134618
I1KDT9	Glycosyltransferase (EC 2.4.1.-)	100792386 GLYMA_06G239500	28.2435	27.3006	28.3686	27.5004	26.2622	26.6544	28.996	28.3	27.7455	29.2737	28.5661	28.4745	28.4094	28.5695	28.5168	28.117	28.4924	28.6121	28.8671	28.5393	28.0898	28.4096	28.6926		catalytic activity;transferase activity;transferase activity, transferring glycosyl groups;transferase activity, transferring hexosyl groups		+	12	12	12	39.8	39.8	39.8	53.102	0	182.02	7135900000	139	2.65506	0.0135408
I1LJE2;I1LJE3	Coatomer subunit gamma	100791801 GLYMA_11G118600	29.6863	29.4678	29.1531	29.4696	29.4341	29.4037	29.087	29.0568	28.8404	28.9299	28.9221	29.3062	29.0867	28.6797	28.8055	28.7573	28.6869	28.8361	28.574	28.9397	28.9467	29.3239	28.9387	cellular process;establishment of localization;establishment of localization in cell;establishment of protein localization;intracellular protein transport;intracellular transport;protein transport;transport;vesicle-mediated transport	structural molecule activity	cell part;COPI vesicle coat;cytoplasmic part;cytoplasmic vesicle part;Golgi apparatus part;intracellular organelle part;intracellular part;macromolecular complex;membrane coat;membrane part;organelle part;protein complex;vesicle coat	+	19	19	2	25.3	25.3	2.1	98.808	0	70.403	12287000000	154	2.6545	0.0135408
A0A0R4J2U8	Uncharacterized protein	100818028 GLYMA_03G027500	30.6566	30.6394	30.6117	30.7573	30.7182	30.9342	31.0419	30.7922	30.7995	30.8542	31.0231	30.9302	31.2692	31.0548	31.3376	31.2597	30.9078	31.0685	31.1841	31.161	30.9255	31.0595	31.2954				+	25	25	20	44.6	44.6	35.4	78.905	0	287.08	44716000000	408	2.64502	0.0137971
I1MY65	Uncharacterized protein	100783077 GLYMA_17G261500	28.279	28.7747	28.9388	27.9996	28.7886	28.178	27.3819	27.4049	28.1045	27.2499	26.6172	27.7818	27.9277	27.2582	27.1732	26.7277	26.8788	28.1982	27.1167	27.0107	27.1517	27.2338	27.0224		binding;catalytic activity;cation binding;copper ion binding;ion binding;metal ion binding;oxidoreductase activity;transition metal ion binding		+	9	9	5	22.2	22.2	14.4	59.959	0	107.83	4675700000	45	2.63619	0.0140369
A0A0R0GW88	Uncharacterized protein	100785134 GLYMA_13G061100	30.8141	30.6551	31.0895	30.7902	30.55	31.3455	30.1831	30.219	29.8644	29.8787	30.1669	30.2681	30.0813	30.2758	29.6727	30.1314	28.9823	30.0292	30.3458	30.4545	30.1558	30.4391	30.2981				+	34	21	21	76.5	51.3	51.3	42.74	0	323.31	29010000000	496	2.62653	0.0142214
I1M2S7	Uncharacterized protein	100780846 GLYMA_13G261400	28.1005	28.0048	27.7818	27.7735	27.8868	27.5359	27.4741	27.4651	27.1544	26.3669	26.77	26.5065	26.8322	26.6393	26.6027	26.8176	27.1653	26.6687	27.247	25.489	25.5759						+	7	7	5	27.6	27.6	20.2	41.392	0	111.78	3202600000	52	2.62894	0.0142214
K7LIK2;K7LIK3;C6TAI4	Carboxypeptidase (EC 3.4.16.-)	100792645 GLYMA_10G104300	26.1406	25.6973	25.9939	26.4231	26.2398	25.865	26.8417	26.843	26.5479	26.1428	26.2642	26.0346	26.4499	26.4616	26.5572	26.4382	26.4335	26.2809	26.2336	26.059	26.2796	26.8051	26.4761		carboxypeptidase activity;catalytic activity;exopeptidase activity;hydrolase activity;peptidase activity;peptidase activity, acting on L-amino acid peptides;serine hydrolase activity;serine-type carboxypeptidase activity;serine-type exopeptidase activity;serine-type peptidase activity		+	4	4	4	13.5	13.5	13.5	55.862	0	45.468	1772900000	64	2.62656	0.0142214
A0A0R0IDW9;C6TMH2;A0A0R0IB61	Uncharacterized protein	GLYMA_09G070700	27.8999	27.6893	27.8868	28.0814	27.9119	28.0363	27.5655	27.8018	27.667	27.5483	27.8098	27.8392	27.6728	27.5764	27.3514	27.3419	26.2979	27.0937	27.2507	26.6206	27.5131	27.5894	27.7028	cellular metabolic process;cellular process;metabolic process			+	6	6	6	25.1	25.1	25.1	31.25	0	42.036	4346700000	44	2.62128	0.0143508
A0A0R0I6U8;I1LEU9;A0A0R0EAU1;A0A0R0EM71;K7N2X7	Uncharacterized protein	100812332 GLYMA_10G272400		25.6437		26.2236	26.1043		25.273			25.2512	25.0469	25.2825	25.1908	25.3286		25.7874			25.651			25.3419	25.0087	amine metabolic process;amino acid activation;carboxylic acid metabolic process;cellular amine metabolic process;cellular amino acid metabolic process;cellular ketone metabolic process;cellular macromolecule metabolic process;cellular metabolic process;cellular nitrogen compound metabolic process;cellular process;macromolecule metabolic process;metabolic process;ncRNA metabolic process;nitrogen c…	adenyl nucleotide binding;adenyl ribonucleotide binding;aminoacyl-tRNA ligase activity;ATP binding;binding;catalytic activity;ligase activity;ligase activity, forming aminoacyl-tRNA and related compounds;ligase activity, forming carbon-oxygen bonds;nucleotide binding;purine nucleotide binding;purine ribonucleoside triphosphate binding;purine ribonucleotide binding;ribonucleotide binding		+	5	5	4	11.5	11.5	10.2	62.251	0	26.962	789200000	19	2.61688	0.0143658
A0A0R4J3S4;I1KSE0;C6TBI5	Uncharacterized protein	100807980 GLYMA_08G115800	26.2609	25.7496	25.7554	25.7664	25.8445	25.4808	25.7654	25.7383	25.3369	25.1943	25.2238	25.1179	25.4945	25.4687	25.1245	25.2458		24.8291		25.116		25.0637	25.4203				+	8	2	2	35.9	12.4	12.4	29.247	0	36.27	931250000	20	2.61947	0.0143658
I1KSR7;I1KSR6;C6TGS4	Uncharacterized protein	100789420 GLYMA_08G127600	29.0088	29.1448	29.3378	29.3585	28.9459	28.9156	28.883	27.9514	27.5513	27.6415	27.7089	28.0714	28.1796	28.6662	28.3688	28.5469	28.4186	28.1058	28.3334	28.4371	27.7878	28.5604	27.7594		nutrient reservoir activity		+	5	5	4	26.1	26.1	23.5	33.447	0	81.395	8225700000	75	2.6179	0.0143658
H9TVI9;M4WFN0;M4QS19;I1LJJ4;Q2LAK4	Cytochrome P450 CYP74C (Fragment)		27.3935	26.7546	27.5571	27.1393	26.1924	25.7313	26.5376	25.9366	25.4311	25.6441	25.7	25.4161	25.3784	26.0729	25.0434	25.6475	25.8365	25.1818	24.82	25.3742	25.2715		25.9003		binding;catalytic activity;cation binding;heme binding;ion binding;iron ion binding;lyase activity;metal ion binding;monooxygenase activity;oxidoreductase activity;oxidoreductase activity, acting on paired donors, with incorporation or reduction of molecular oxygen;tetrapyrrole binding;transition metal ion binding		+	6	6	6	14.1	14.1	14.1	53.444	0	36.523	1483000000	37	2.61003	0.0145503
I1MZN5;K7LR68	Uncharacterized protein	100786467 GLYMA_18G050700	27.8503	28.3808	27.924	28.5115	28.6241	28.1091	28.2316	28.0885	28.1785	27.6437	27.6609	27.8025	27.6864	27.8432	27.8483	27.9661	28.444	27.7984	27.6834	27.7019	27.7799	27.3061	27.5622		adenyl nucleotide binding;adenyl ribonucleotide binding;ATP binding;binding;catalytic activity;kinase activity;nucleotide binding;phosphotransferase activity, alcohol group as acceptor;protein kinase activity;protein serine/threonine kinase activity;purine nucleotide binding;purine ribonucleoside triphosphate binding;purine ribonucleotide binding;ribonucleotide binding;transferase activity;transf…	cell part;integral to membrane;intrinsic to membrane;membrane part	+	11	11	9	12.6	12.6	10.8	105.01	0	52.938	5526500000	75	2.6046	0.0146893
I1JVL6;I1KFQ7;C6SXI7;C6SX72;A0A0R0HFE2;I1MIK9;A0A0R0JNM6;A0A0R0H4Q2;A0A0R0JNS2;I1MIL0;A0A0R0K7Y8	Uncharacterized protein	100791687 GLYMA_04G111500 GLYMA_12G131700	29.6484	29.5249	29.9086	29.4029	29.2392	29.1005	29.531	29.2069	29.6386	29.2785	28.9318	28.9534	29.2252	29.2426	29.0729	29.4562	28.9881	28.5994		28.9858	29.06	28.9507	28.8601	biosynthetic process;cellular biosynthetic process;cellular macromolecule biosynthetic process;cellular macromolecule metabolic process;cellular metabolic process;cellular process;cellular protein metabolic process;macromolecule biosynthetic process;macromolecule metabolic process;metabolic process;primary metabolic process;protein metabolic process;translation	structural constituent of ribosome;structural molecule activity	cell part;cytoplasmic part;intracellular non-membrane-bounded organelle;intracellular organelle;intracellular part;macromolecular complex;non-membrane-bounded organelle;organelle;ribonucleoprotein complex;ribosome	+	6	6	1	30.4	30.4	8.2	19.627	0	55.661	12922000000	72	2.59104	0.01511
P48640;I1JF43	Glutathione reductase, chloroplastic (GR) (GRase) (EC 1.8.1.7)	GR	25.478	25.4774		25.3173	25.5248	25.4867	26.0098	25.4727	25.5707	25.9859	25.7076	25.7464	25.9539	25.8716	26.0795	26.1255	26.0974	25.9018	25.9998		25.4162			amine metabolic process;biological regulation;carboxylic acid metabolic process;cell redox homeostasis;cellular amine metabolic process;cellular amino acid metabolic process;cellular homeostasis;cellular ketone metabolic process;cellular metabolic process;cellular modified amino acid metabolic process;cellular nitrogen compound metabolic process;cellular process;glutathione metabolic process;home…	antioxidant activity;binding;catalytic activity;coenzyme binding;cofactor binding;disulfide oxidoreductase activity;flavin adenine dinucleotide binding;glutathione disulfide oxidoreductase activity;glutathione-disulfide reductase activity;NADP binding;nucleotide binding;oxidoreductase activity;oxidoreductase activity, acting on a sulfur group of donors;oxidoreductase activity, acting on a sulfur …	cell part;chloroplast;cytoplasmic part;intracellular membrane-bounded organelle;intracellular organelle;intracellular part;membrane-bounded organelle;organelle;plastid	+	6	6	2	13.1	13.1	3.5	58.782	0	11.488	1101200000	29	2.58652	0.0152224
A0A0R0GV25	Uncharacterized protein	100796758 GLYMA_13G109800					25.5942		26.2415	26.803	26.9466	27.0821	28.0838	27.2282	26.7489	27.5549	26.5268	27.1784	26.723	28.5411	28.3892	28.2208	27.3622	27.3738	27.9263				+	10	6	6	36.3	24	24	42.936	0	141.63	2979600000	52	2.5759	0.015553
A0A0R4J2Q1	Uncharacterized protein	100797018 GLYMA_02G148200	26.3523	26.4859	26.8224	26.6583	27.3843	26.7913	26.771	26.9542	27.8995	27.9674	28.0601	27.799	27.4678	28.0344	27.6842	27.562	28.3997	28.0728	27.9658	27.9374	27.5157	28.3336	27.384		aspartic-type endopeptidase activity;aspartic-type peptidase activity;catalytic activity;endopeptidase activity;hydrolase activity;peptidase activity;peptidase activity, acting on L-amino acid peptides		+	9	9	9	24.4	24.4	24.4	46.448	0	29.861	4245500000	76	2.57008	0.0157163
C6TH60;A0A0R0EG72;I1N5J9	Uncharacterized protein		25.7934	25.3545	25.8742	25.5638	26.2329		26.4495	25.8778	26.1884	26.7475	26.5842	26.3542	26.8841	26.2426	26.4837	26.5348	26.2826	27.1312	27.042		26.9164	26.3071	26.8686				+	10	8	8	36	31.9	31.9	37.33	0	59.76	1908400000	45	2.56292	0.0158542
A0A0R0FJI5	Uncharacterized protein	GLYMA_16G008900			26.5621	25.6204	25.3615	25.7578	25.7511	25.5431	26.1169		26.0563	26.1415	26.0128	26.1532	25.5743		25.9445	26.4548	26.2813	26.3761	26.3939	26.5523					+	13	3	3	12.5	2.8	2.8	152.93	0	7.1345	1238700000	28	2.55865	0.0158542
C6TI33;A0A0R4J410	Obg-like ATPase 1		26.4178	27.1825	27.034	27.0964	27.4755	26.7544	26.0898	26.3729	26.6937	27.0446	27.196	27.2476	27.374	27.0182	26.5038	26.9848	26.8905	26.7393	26.9657	27.0533	27.4344	27.7951	27.808		adenyl nucleotide binding;adenyl ribonucleotide binding;ATP binding;ATPase activity;binding;catalytic activity;GTP binding;guanyl nucleotide binding;guanyl ribonucleotide binding;hydrolase activity;hydrolase activity, acting on acid anhydrides;hydrolase activity, acting on acid anhydrides, in phosphorus-containing anhydrides;nucleoside-triphosphatase activity;nucleotide binding;purine nucleotide …	cell part;cytoplasm;intracellular part	+	7	7	7	19.3	19.3	19.3	44.438	0	22.415	2936800000	45	2.55864	0.0158542
I1LGB7;I1LGB1;I1JDH6	Uncharacterized protein	100820352 GLYMA_11G020100	30.2028	30.299	29.5603	30.0196	29.7244	29.333	29.6623	29.288	28.4301	29.3088	29.2365	29.6603	29.6978	29.277	28.9518	29.0193	28.4305	28.4811	28.8003	28.427	28.9031	29.1189	28.7191	biosynthetic process;cellular biosynthetic process;cellular macromolecule biosynthetic process;cellular macromolecule metabolic process;cellular metabolic process;cellular process;cellular protein metabolic process;macromolecule biosynthetic process;macromolecule metabolic process;metabolic process;primary metabolic process;protein metabolic process;translation	binding;nucleic acid binding;RNA binding;structural constituent of ribosome;structural molecule activity	cell part;cytoplasmic part;intracellular non-membrane-bounded organelle;intracellular organelle;intracellular organelle part;intracellular part;macromolecular complex;non-membrane-bounded organelle;organelle;organelle part;ribonucleoprotein complex;ribosome;small ribosomal subunit	+	12	12	4	42.2	42.2	10.2	30.248	0	76.443	14534000000	131	2.56048	0.0158542
I1KCL6	Uncharacterized protein	100819703 GLYMA_06G187200	25.6699	26.2549	25.7052	25.9174	26.8332	26.5167	26.2188	26.1123	26.2093	26.9955	26.5576	26.8832	26.6744	26.5853	26.6391	26.6148	26.1103	26.6527	26.9631	26.8274	26.8863	27.1355	26.8007	lipid metabolic process;metabolic process;primary metabolic process	catalytic activity;hydrolase activity		+	8	8	8	17.1	17.1	17.1	70.915	0	74.137	2117300000	46	2.56275	0.0158542
I1KUN0	Uncharacterized protein	100797897 GLYMA_08G187500	28.2593	28.1683	28.0673	28.1117	28.1406	27.686	27.8838	27.8235	28.136	27.695	27.6187	27.7037	27.6272	27.6693	27.3575	27.7583	27.495	27.516	26.9092	27.4795	27.8327	27.3669	27.6317	carbohydrate metabolic process;cellular carbohydrate metabolic process;cellular macromolecule metabolic process;cellular metabolic process;cellular process;cellular protein metabolic process;glycosylation;macromolecule glycosylation;macromolecule metabolic process;macromolecule modification;metabolic process;primary metabolic process;protein glycosylation;protein metabolic process;protein modific…	catalytic activity;glucosyltransferase activity;transferase activity;transferase activity, transferring glycosyl groups;transferase activity, transferring hexosyl groups;UDP-glucose:glycoprotein glucosyltransferase activity;UDP-glucosyltransferase activity;UDP-glycosyltransferase activity		+	15	15	15	12.3	12.3	12.3	184.15	0	231.54	5077700000	89	2.56114	0.0158542
A0A0R0HR30	Uncharacterized protein	100500084 GLYMA_11G209100	32.2456	32.3695	32.2315	32.2752	32.615	32.5189	32.6882	32.5731	32.5421	32.6074	32.5228	32.4743	32.5951	32.5811	32.87	32.705	32.6786	32.6369	32.6142	32.6548	32.5001	32.1536	32.4468	metabolic process;oxidation-reduction process	binding;catalytic activity;coenzyme binding;cofactor binding;flavin adenine dinucleotide binding;oxidoreductase activity		+	22	22	5	56.4	56.4	18.9	47.039	0	323.31	127970000000	620	2.55617	0.0158771
I1JJQ4	Uncharacterized protein	100794913 GLYMA_02G305600	30.0842	30.0373	30.1094	30.1182	29.8382	30.4124	30.3042	30.0505	30.2626	29.6755	30.075	30.3011	30.3466	30.4896	30.1682	30.4065	29.9184	29.5192	29.5506	29.5364	29.8604	29.776	29.6662	cellular macromolecule metabolic process;cellular metabolic process;cellular process;cellular protein metabolic process;macromolecule metabolic process;metabolic process;primary metabolic process;protein folding;protein metabolic process;response to stimulus;response to stress	adenyl nucleotide binding;adenyl ribonucleotide binding;ATP binding;binding;nucleotide binding;purine nucleotide binding;purine ribonucleoside triphosphate binding;purine ribonucleotide binding;ribonucleotide binding		+	18	16	2	26.5	25.4	2.9	89.715	0	104	25158000000	212	2.5555	0.0158771
I1KJJ6	Uncharacterized protein	100803164 GLYMA_07G115000	28.5705	29.48	29.4251	28.5438	28.8679	28.643	28.5953	28.4897	28.2011	28.1597	28.0935	27.6765	28.0314	28.3729	28.5645	27.9898	28.5716	28.1448	28.2527	28.3553	28.0552	28.2518	28.0936		electron carrier activity		+	4	3	3	30.3	22.2	22.2	19.191	0	65.928	7272200000	25	2.55119	0.0159893
Q7G1G6;O48548	Aspartate aminotransferase (EC 2.6.1.1)	AAT	28.6659	29.0344	28.7209	28.8666	29.4248	28.8465	29.4276	29.1153	28.7454	29.3099	29.5469	29.8148	29.1151	28.8911	29.6999	29.3927	29.1459	29.7167	29.8345	29.6044	29.4967	29.8956	29.6347	amine metabolic process;biosynthetic process;carboxylic acid metabolic process;cellular amine metabolic process;cellular amino acid metabolic process;cellular ketone metabolic process;cellular metabolic process;cellular nitrogen compound metabolic process;cellular process;metabolic process;nitrogen compound metabolic process;organic acid metabolic process;oxoacid metabolic process;primary metabol…	binding;catalytic activity;cofactor binding;L-aspartate:2-oxoglutarate aminotransferase activity;L-phenylalanine aminotransferase activity;L-phenylalanine:2-oxoglutarate aminotransferase activity;pyridoxal phosphate binding;transaminase activity;transferase activity;transferase activity, transferring nitrogenous groups;vitamin B6 binding;vitamin binding		+	16	4	4	43.2	13.1	13.1	45.6	0	193.23	13374000000	63	2.54813	0.0160562
I1KLC9;I1KLD0;K7L567;A0A0R0IHQ8	Uncharacterized protein	100809915 GLYMA_07G189900	27.7338	27.4996	27.6131	27.7398	27.7294	27.6562	28.0367	28.0033	28.3901	28.0641	27.8573	28.1002	27.9602	27.6791	27.7877	27.6453	27.6054	27.842	27.8264	27.6904	27.7351	27.8876	27.6615		binding;calcium ion binding;catalytic activity;cation binding;coenzyme binding;cofactor binding;flavin adenine dinucleotide binding;ion binding;metal ion binding;oxidoreductase activity		+	13	13	9	26.7	26.7	17.4	65.191	0	105.71	4874800000	118	2.54685	0.0160572
I1KHM5;C6T1I1	Uncharacterized protein	GLYMA_07G048300		26.3247		26.2466		26.1867		25.8212			25.9976		26.2645	26.0258	25.7867	25.9362	25.9699	26.5497	26.8551	26.8275		26.6547	26.2913	cellular metabolic process;cellular process;metabolic process;phosphate-containing compound metabolic process;phosphorus metabolic process	binding;catalytic activity;cation binding;hydrolase activity;hydrolase activity, acting on acid anhydrides;hydrolase activity, acting on acid anhydrides, in phosphorus-containing anhydrides;inorganic diphosphatase activity;ion binding;magnesium ion binding;metal ion binding;pyrophosphatase activity	cell part;cytoplasm;intracellular part	+	2	2	1	15.6	15.6	7.5	24.473	0	9.0022	1456000000	20	2.54387	0.0161218
I1KH67;A7LCD5;I1KH68	Lipoxygenase (EC 1.13.11.-)	GLYMA_07G034800	28.8291	27.9869	28.38	27.47	27.5301	27.298	27.2679	27.4809	27.3488	26.8184	27.207	27.4975	27.7114	27.1305	27.4111	27.3328		26.9718	27.2092	27.2379	27.6177	28.2999	27.4901	biosynthetic process;carboxylic acid biosynthetic process;carboxylic acid metabolic process;cellular biosynthetic process;cellular ketone metabolic process;cellular lipid metabolic process;cellular metabolic process;cellular process;fatty acid biosynthetic process;fatty acid metabolic process;lipid biosynthetic process;lipid metabolic process;metabolic process;monocarboxylic acid metabolic proces…	binding;catalytic activity;cation binding;dioxygenase activity;ion binding;metal ion binding;oxidoreductase activity;oxidoreductase activity, acting on single donors with incorporation of molecular oxygen;oxidoreductase activity, acting on single donors with incorporation of molecular oxygen, incorporation of two atoms of oxygen		+	16	12	10	22.9	19.9	17.5	96.343	0	163.31	4156600000	66	2.54161	0.0161594
I1KN31;I1KN30;C6SVQ5	CASP-like protein	GLYMA_07G251300	29.0937	28.6342	29.5994	29.7002	29.8254	29.5295	29.2153	29.691	29.7263	28.7341	28.4499	28.1117	27.9405	28.6235	28.8333				28.2141	28.9826	28.8176	28.0461	28.3537			cell part;integral to membrane;intrinsic to membrane;membrane;membrane part;plasma membrane	+	3	3	3	18.9	18.9	18.9	19.492	0	29.366	10173000000	46	2.53203	0.0164731
I1LPJ9;I1LIT2	Uncharacterized protein	100779929 GLYMA_12G027400	28.2647	28.6566	28.2386	28.1183	28.1548	27.9079	27.6668	27.352	27.1779	27.3122	26.7868	27.2464	27.7686	27.4329	27.0703	27.1736	25.3438	27.0833	27.1743	26.753	27.0563	27.5916	26.9679		binding;nucleic acid binding;nucleotide binding		+	7	7	7	11.3	11.3	11.3	77.569	0	22.27	4251700000	57	2.52995	0.0165052
I1KG56	Coatomer subunit beta (Beta-coat protein)	100802469 GLYMA_07G004100	29.2303	29.2857	29.1976	29.3093	29.246	29.2703	29.2663	29.0102	28.8511	28.9237	29.1255	29.2445	29.2489	28.7648	28.7032	28.7255	28.3116	28.6379	28.48	28.8699	28.7931	29.1386	29.0536	cellular process;establishment of localization;establishment of localization in cell;establishment of protein localization;intracellular protein transport;intracellular transport;protein transport;transport;vesicle-mediated transport	structural molecule activity	cell part;COPI vesicle coat;cytoplasmic part;cytoplasmic vesicle part;Golgi apparatus part;intracellular organelle part;intracellular part;macromolecular complex;membrane coat;membrane part;organelle part;protein complex;vesicle coat	+	19	19	3	21.9	21.9	4.3	106.02	0	58.046	11343000000	175	2.52528	0.0166365
C7S8C5	Germin-like protein 11	100796041 GLYMA_20G220800		26.302	26.3701	26.754	27.4219	27.0205	27.2638	27.3103	27.5668		27.2712		27.6287	27.8125	27.4594	27.6453	27.4859	26.933	27.018	26.9243	27.6733	26.6826	27.301		binding;cation binding;ion binding;manganese ion binding;metal ion binding;nutrient reservoir activity;transition metal ion binding	extracellular region	+	4	3	2	23.3	19	15.5	24.976	0	118.9	3069900000	30	2.52239	0.0167003
C6THP8;A0A0R0ITT9;I1KRJ0	6,7-dimethyl-8-ribityllumazine synthase (DMRL synthase) (EC 2.5.1.78)		24.4599	24.9065	25.2623	22.9389	23.0546	23.6076	24.5118	23.5684	25.6692	23.7238	23.3541	23.8369	24.1535	23.3744	25.2827		25.6562	24.8923		24.2249	24.8529	25.6513	25.2256	biosynthetic process;cellular biosynthetic process;cellular metabolic process;cellular nitrogen compound biosynthetic process;cellular nitrogen compound metabolic process;cellular process;flavin-containing compound biosynthetic process;flavin-containing compound metabolic process;heterocycle biosynthetic process;heterocycle metabolic process;metabolic process;nitrogen compound metabolic process;r…	catalytic activity;transferase activity	cell part;macromolecular complex;protein complex;riboflavin synthase complex	+	2	2	2	9.6	9.6	9.6	19.981	0	5.5316	505000000	23	2.51001	0.017116
I1MYB0;C6TK38	Uncharacterized protein	100794235 GLYMA_18G002800	26.4463	25.9349	25.9573	25.8902	26.574	26.4485	26.8631	26.6225	27.1923	27.9459	27.079	27.1806	26.805	27.2003	27.7995	26.9999	27.2075	26.8441	27.0009	26.8927	26.9109	26.5691	27.2056		binding;selenium binding		+	13	3	3	35.3	9.5	9.5	53.433	0	84.263	2952300000	73	2.5072	0.017116
I1LQ45;I1LJE1	Uncharacterized protein	100787237 GLYMA_12G043900	24.8909	24.8616	24.9965	25.4085	25.0675	25.5358	24.6679	24.9585	25.0184	24.6789	24.701	24.8624	24.6626	24.5551	24.6745	24.2502	24.6197	24.8463	24.7931	25.1093	24.7615	25.0902					+	5	5	4	14.9	14.9	11.9	41.02	0	9.9222	616400000	25	2.50729	0.017116
I1M5L8;I1M5L7	Uncharacterized protein	100813658 GLYMA_13G359500	30.8289	30.7671	30.5955	30.5186	30.7112	30.7069	30.5344	30.4053	30.3545	30.3497	30.0528	30.4492	30.3301	30.5916	30.5312	30.1912	30.4287	30.1513	30.3121	30.1582	30.0747	30.3752	30.0921		adenyl nucleotide binding;adenyl ribonucleotide binding;ATP binding;binding;nucleotide binding;purine nucleotide binding;purine ribonucleoside triphosphate binding;purine ribonucleotide binding;ribonucleotide binding		+	35	35	8	45.5	45.5	12.5	94.933	0	323.31	29647000000	439	2.50685	0.017116
A0A0R0HHJ1	Uncharacterized protein	GLYMA_12G141600	25.2201		25.0199	25.7347	25.3297		27.0667	26.5532	26.3367	27.0019	26.8485	26.848	26.8091	26.8689		27.4261	26.259		27.1457			27.5645					+	4	2	2	56.6	26.5	26.5	9.0624	0	28.536	1738200000	34	2.50477	0.0171504
I1MEH3	Uncharacterized protein	100795029 GLYMA_15G072900	29.7116	29.8079	29.792	29.8128	30.1076	30.1017	30.1881	30.1374	30.2479	30.2262	29.9955	30.1309	30.179	30.4382	30.5499	30.3587	30.9158	30.3834	30.1441	29.8906	30.2711	29.9207	30.1664	allantoin catabolic process;allantoin metabolic process;amine metabolic process;catabolic process;cellular amide catabolic process;cellular amide metabolic process;cellular catabolic process;cellular metabolic process;cellular nitrogen compound catabolic process;cellular nitrogen compound metabolic process;cellular process;heterocycle catabolic process;heterocycle metabolic process;metabolic proc…	allantoinase activity;binding;catalytic activity;cation binding;cobalt ion binding;hydrolase activity;hydrolase activity, acting on carbon-nitrogen (but not peptide) bonds;hydrolase activity, acting on carbon-nitrogen (but not peptide) bonds, in cyclic amides;ion binding;metal ion binding;transition metal ion binding;zinc ion binding		+	13	13	6	32	32	17.3	56.645	0	157.74	25505000000	174	2.4974	0.0173956
I1LF60;I1N438;I1L655;I1NF84;K7MUJ9	Uncharacterized protein	100791429 GLYMA_10G283200	31.2276	31.1763	31.1924	31.1193	31.1752	31.1095	31.3798	31.2588	31.3129	31.1992	31.1721	31.2464	31.4053	31.1946	31.1615	31.0361	31.2488	31.0797	31.1504	30.8802	30.9939	30.8979	31.0417	ATP hydrolysis coupled proton transport;ATP metabolic process;cation transport;cellular metabolic process;cellular nitrogen compound metabolic process;cellular process;energy coupled proton transport, against electrochemical gradient;establishment of localization;heterocycle metabolic process;hydrogen transport;ion transmembrane transport;ion transport;metabolic process;monovalent inorganic catio…	adenyl nucleotide binding;adenyl ribonucleotide binding;ATP binding;binding;catalytic activity;hydrolase activity;hydrolase activity, acting on acid anhydrides;hydrolase activity, acting on acid anhydrides, catalyzing transmembrane movement of substances;nucleotide binding;purine nucleotide binding;purine ribonucleoside triphosphate binding;purine ribonucleotide binding;ribonucleotide binding;tra…	cell part;macromolecular complex;membrane part;protein complex;proton-transporting two-sector ATPase complex, catalytic domain;proton-transporting V-type ATPase, V1 domain	+	26	26	26	65.4	65.4	65.4	54.185	0	323.31	52145000000	650	2.49415	0.0174718
I1L8A9	Uncharacterized protein	100795994 GLYMA_10G033100	28.2044	28.3669	27.6241	27.8936	28.2703	28.1476	27.3001	27.8541	27.4147	27.3987	27.361	27.5216	27.8348	27.3154	26.7303	26.9239	27.1055	27.525	27.5789	27.3331	27.8189	27.065	27.8268	cellular component assembly;cellular component assembly at cellular level;cellular component organization;cellular component organization at cellular level;cellular component organization or biogenesis;cellular component organization or biogenesis at cellular level;cellular macromolecular complex assembly;cellular macromolecular complex subunit organization;cellular process;chromatin organization…	binding;DNA binding;nucleic acid binding	cell part;chromosomal part;intracellular membrane-bounded organelle;intracellular organelle;intracellular organelle part;intracellular part;macromolecular complex;membrane-bounded organelle;nucleosome;nucleus;organelle;organelle part;protein-DNA complex	+	4	4	4	24.9	24.9	24.9	30.933	0	75.536	4484300000	128	2.49191	0.0174718
K7KYB1;K7KYB2	Aconitate hydratase (Aconitase) (EC 4.2.1.3)	100793264 GLYMA_06G305700	28.3512	28.3317	28.4146	28.3396	28.5803	28.7568	28.9338	28.6334	28.4847	28.9157	28.7296	28.8094	29.0522	28.9647	28.9968	29.0142	29.2512	28.9047	28.9113	28.7057	28.9018	28.6349	28.3236		4 iron, 4 sulfur cluster binding;aconitate hydratase activity;binding;carbon-oxygen lyase activity;catalytic activity;hydro-lyase activity;iron-sulfur cluster binding;lyase activity;metal cluster binding		+	28	13	4	37.3	21.5	7.6	106.95	0	306.62	9931800000	175	2.4922	0.0174718
K7LGZ4	Serine/threonine-protein phosphatase (EC 3.1.3.16)	100809465 GLYMA_10G022700	26.7036	26.5799	26.7362	26.9641	26.9892	27.188	26.7132	26.904	27.1052	26.8484	27.0967	27.2677	27.149	26.8744	26.8381	26.9509	26.6188	27.3542	27.1549	27.2716	27.1347	27.4472	27.2645	biological regulation;brassinosteroid mediated signaling pathway;cellular process;cellular response to brassinosteroid stimulus;cellular response to chemical stimulus;cellular response to endogenous stimulus;cellular response to hormone stimulus;cellular response to organic substance;cellular response to steroid hormone stimulus;cellular response to stimulus;hormone-mediated signaling pathway;reg…	catalytic activity;hydrolase activity;hydrolase activity, acting on ester bonds;phosphatase activity;phosphoprotein phosphatase activity;phosphoric ester hydrolase activity		+	11	11	1	14.6	14.6	1.8	96.069	0	37.802	2765200000	74	2.48577	0.017672
A0A0R0F2Z4	Uncharacterized protein	100820155 GLYMA_18G219100	31.2899	31.1049	31.2947	31.4633	31.5043	31.1666	31.846	31.326	31.5959	31.6589	31.8281	32.0798	32.1092	31.7301	32.1067	32.0949	31.5876	31.8014	31.7409	31.69	31.8501	31.8969	31.848				+	24	24	5	49	49	8.4	60.836	0	283.79	79372000000	456	2.4843	0.0176832
A0A0R0GDY6;C6TCN9;I1M669	Uncharacterized protein	100776777 GLYMA_14G004600	27.6465	27.4691	28.0056	27.5556	27.3143	26.8696	28.074	27.2736	27.6308	27.8523	28.4657	28.1529	28.5804	28.3463	28.143	28.1703	27.8566	28.9853	28.8165	28.5984	28.2112	29.3366	27.9226		catalytic activity;transferase activity;transferase activity, transferring acyl groups;transferase activity, transferring acyl groups other than amino-acyl groups		+	6	6	2	25.1	25.1	8.1	41.556	0	109.87	6142800000	62	2.4805	0.0177706
I1MB50;C6T3E0;I1MB51	Uncharacterized protein	100527131 GLYMA_14G187700	28.6324	28.3623	28.4307	28.8221	29.1277	28.9006	29.3412	29.2999	29.0213	29.062	29.2651	28.8763	29.0274	29.3882	28.8555	29.3806	29.3313	29.2167	29.1415	29.2186	29.2687	28.9393	29.0605	amine biosynthetic process;amine metabolic process;biosynthetic process;carboxylic acid biosynthetic process;carboxylic acid metabolic process;cellular amine metabolic process;cellular amino acid biosynthetic process;cellular amino acid metabolic process;cellular biosynthetic process;cellular ketone metabolic process;cellular metabolic process;cellular modified amino acid biosynthetic process;cel…	binding;catalytic activity;cation binding;hydrolase activity;hydrolase activity, acting on ester bonds;hydroxyacylglutathione hydrolase activity;ion binding;metal ion binding;thiolester hydrolase activity;transition metal ion binding;zinc ion binding		+	8	8	8	46.1	46.1	46.1	28.717	0	87.06	14662000000	129	2.4798	0.0177706
I1JJV5;I1M647	Uncharacterized protein	100808907 GLYMA_02G310400	26.8553	26.5925	26.9333	26.4027	26.5779	26.6391	26.2497	26.6435	27.1388	26.132	26.152	26.1599	26.0728		26.0854	26.0565	25.9274	26.0942	25.8861			25.9423			adenyl nucleotide binding;adenyl ribonucleotide binding;ATP binding;binding;catalytic activity;kinase activity;nucleotide binding;phosphotransferase activity, alcohol group as acceptor;protein kinase activity;purine nucleotide binding;purine ribonucleoside triphosphate binding;purine ribonucleotide binding;ribonucleotide binding;transferase activity;transferase activity, transferring phosphorus-c…		+	5	3	3	11.8	7.7	7.7	57.92	0	8.718	1629100000	17	2.47095	0.0180873
I1L904;I1L903;I1LZ93	Uncharacterized protein	100781465 GLYMA_10G058100	29.245	28.7737	28.6706	29.0914	29.0417	28.9267	29.4049	29.2928	29.1648	29.5244	29.608	29.5993	29.4001	29.1384	29.0497	29.4558	29.5192	29.2231	29.4622	29.5056	29.4826	29.5117	29.4789	acetyl-CoA catabolic process;acetyl-CoA metabolic process;catabolic process;cellular catabolic process;cellular metabolic process;cellular process;coenzyme catabolic process;coenzyme metabolic process;cofactor catabolic process;cofactor metabolic process;metabolic process;tricarboxylic acid cycle	binding;catalytic activity;cation binding;coenzyme binding;cofactor binding;ion binding;isocitrate dehydrogenase (NAD+) activity;isocitrate dehydrogenase activity;magnesium ion binding;metal ion binding;NAD binding;nucleotide binding;oxidoreductase activity;oxidoreductase activity, acting on CH-OH group of donors;oxidoreductase activity, acting on the CH-OH group of donors, NAD or NADP as acceptor	cell part;cytoplasmic part;intracellular membrane-bounded organelle;intracellular organelle;intracellular part;membrane-bounded organelle;mitochondrion;organelle	+	6	6	6	31.8	31.8	31.8	32.492	0	237.55	13439000000	110	2.46704	0.0181531
I1LAZ4;I1LAZ3	Uncharacterized protein	100776327 GLYMA_10G143500	27.7273	27.3828	27.7754	27.7913	27.958	27.4627	28.2821	27.6649	28.2416	27.9936	28.2947	27.8049	28.1463	28.2847	28.5068	28.3218	28.4373	28.7589	28.4887	28.2929	28.4339	28.2837	28.0053	lipid metabolic process;metabolic process;primary metabolic process	aspartic-type endopeptidase activity;aspartic-type peptidase activity;catalytic activity;endopeptidase activity;hydrolase activity;peptidase activity;peptidase activity, acting on L-amino acid peptides		+	5	5	2	12.2	12.2	4.5	56.016	0	17.199	6037600000	68	2.46702	0.0181531
K7KYV6	Lipoxygenase (EC 1.13.11.-)	GLYMA_07G006700	28.1882	29.4115	28.1404	28.2532	29.0319	28.6804	27.1873	28.6192	28.201	27.2854	27.4825	26.5182	27.7761	27.9067	29.1044	28.4725	29.8764	27.2379	26.8995	27.5417	27.9343	27.4432	28.0236	biosynthetic process;carboxylic acid biosynthetic process;carboxylic acid metabolic process;cellular biosynthetic process;cellular ketone metabolic process;cellular lipid metabolic process;cellular metabolic process;cellular process;fatty acid biosynthetic process;fatty acid metabolic process;lipid biosynthetic process;lipid metabolic process;metabolic process;monocarboxylic acid metabolic proces…	binding;catalytic activity;cation binding;dioxygenase activity;ion binding;metal ion binding;oxidoreductase activity;oxidoreductase activity, acting on single donors with incorporation of molecular oxygen;oxidoreductase activity, acting on single donors with incorporation of molecular oxygen, incorporation of two atoms of oxygen		+	22	9	8	49.5	20.2	20.2	63.928	0	78.278	6469800000	80	2.45886	0.0184476
I1L7W1	Uncharacterized protein	100793361 GLYMA_10G019000	27.9429	27.7932	28.1871	28.2774	27.7414	28.3069	28.6202	28.7672	28.4565	28.4281	28.9612	28.7495	28.8448	28.7548	28.5464	28.8711	28.3784	28.5544	28.5656	28.8151	28.3827	28.7077	28.3994		active transmembrane transporter activity;adenyl nucleotide binding;adenyl ribonucleotide binding;ATP binding;ATPase activity;ATPase activity, coupled;ATPase activity, coupled to movement of substances;ATPase activity, coupled to transmembrane movement of substances;binding;catalytic activity;hydrolase activity;hydrolase activity, acting on acid anhydrides;hydrolase activity, acting on acid anhyd…	cell part;integral to membrane;intrinsic to membrane;membrane part	+	18	18	13	14.2	14.2	10.7	167.67	0	267.44	7832200000	185	2.43562	0.0193578
K7MKQ2;I1MTH1	Pantothenate kinase 2 (EC 2.7.1.33)	100783082 GLYMA_17G089200	25.673	25.1156	25.547	25.9415	25.6708	26.0627	26.1057	25.9032	26.1906	26.1465	26.7511	26.4977	26.5395	25.9186	25.902	26.455	25.3313	26.32	26.4327	26.7203	26.5916	26.6847	26.7491	biosynthetic process;cellular biosynthetic process;cellular metabolic process;cellular nitrogen compound metabolic process;cellular process;coenzyme A biosynthetic process;coenzyme A metabolic process;coenzyme biosynthetic process;coenzyme metabolic process;cofactor biosynthetic process;cofactor metabolic process;heterocycle metabolic process;metabolic process;nitrogen compound metabolic process;…	adenyl nucleotide binding;adenyl ribonucleotide binding;ATP binding;binding;catalytic activity;kinase activity;nucleotide binding;pantothenate kinase activity;phosphotransferase activity, alcohol group as acceptor;purine nucleotide binding;purine ribonucleoside triphosphate binding;purine ribonucleotide binding;ribonucleotide binding;transferase activity;transferase activity, transferring phospho…		+	9	9	9	12.5	12.5	12.5	100.04	0	55.807	1538000000	52	2.43591	0.0193578
E2FKI3;E2FKI7;A0A0R0GJT9	Sieve element occlusion j	SEOj 100797481 Glyma13g03610 GLYMA_13G077200	27.003	27.2533	26.9914	26.7664	26.8942	27.1321	26.517	26.4178	26.3074				25.9374			25.7246											+	7	7	7	10.7	10.7	10.7	80.32	0	13.039	1168900000	16	2.43307	0.0193778
I1KT56;I1K4M1;I1K4M0;I1KT57;I1KT58	Uncharacterized protein	100776446 GLYMA_08G138800	28.2728	28.0124	28.28	28.3702	28.488	28.1753	28.8488	28.7378	28.9544	28.6006	28.6908	28.8901	28.7154	28.7316	28.8211	29.0398	28.5718	28.5787	28.5279	29.1372	28.7452	28.8442	28.7674	biosynthetic process;metabolic process	binding;catalytic activity;cofactor binding;pyridoxal phosphate binding;vitamin B6 binding;vitamin binding		+	13	13	11	37.3	37.3	33.6	50.234	0	230.64	9502000000	185	2.4317	0.0193778
I1LL18;K7LTN0	Uncharacterized protein	100809491 GLYMA_11G194700	25.1889		25.8541	25.0362	24.8273		25.2114	25.3564		26.4494	26.2644	26.4293	26.2869	25.7245	26.0484	25.6748	25.3439	26.5513	27.1297	25.985	26.0434	26.1277	25.6734		adenyl nucleotide binding;adenyl ribonucleotide binding;ATP binding;ATPase activity;binding;catalytic activity;hydrolase activity;hydrolase activity, acting on acid anhydrides;hydrolase activity, acting on acid anhydrides, in phosphorus-containing anhydrides;nucleoside-triphosphatase activity;nucleotide binding;purine nucleotide binding;purine ribonucleoside triphosphate binding;purine ribonucleo…		+	5	5	3	8.7	8.7	5	66.37	0	31.679	1215800000	22	2.43189	0.0193778
C6T265	Ferredoxin	100500583 GLYMA_20G110800	27.9255	27.1555	26.9109	27.1322	27.4907	27.7705	28.4637	27.8318	27.8143	28.1975	28.1833	28.2214	28.3539	28.4218	29.0631	28.2831	28.6685	27.3705	27.9848	28.0665	27.8452	28.1929	28.1347	cellular metabolic process;cellular process;electron transport chain;generation of precursor metabolites and energy;metabolic process;oxidation-reduction process	2 iron, 2 sulfur cluster binding;binding;cation binding;electron carrier activity;ion binding;iron-sulfur cluster binding;metal cluster binding;metal ion binding		+	4	4	1	36.4	36.4	20.1	16.546	0	177.76	5731800000	33	2.42019	0.0198458
C6SZA1	Uncharacterized protein	100500006 GLYMA_03G015400	27.5461	27.444	27.5832	27.6611	27.3753	27.3175	27.4955	27.3154	27.1545	26.9392	26.8362	26.9824	26.6122	27.4658	26.6648	27.057	26.2794	26.9232	26.3659	26.7448	26.7135	26.8282	26.9729				+	4	4	2	25.5	25.5	17.4	16.624	0	225.78	2931700000	45	2.41668	0.019954
C6TMY2;A0A0R0IM08;A0A0R0IL25	Uncharacterized protein		29.655	30.2324	29.2737	28.4019	28.9476	29.5211	28.3494	28.1276	29.0087	28.3572		27.7233	28.1032	28.3804	29.2114	28.0965	29.144	28.2831	27.6096	28.0519	28.2366	27.5822	27.688		transporter activity	cell part;integral to membrane;intrinsic to membrane;membrane part	+	8	8	5	28.4	28.4	15.9	30.867	0	20.075	10304000000	30	2.41431	0.0199579
K7LRU2	Uncharacterized protein	100814656 GLYMA_11G237200	28.2213	28.1261	27.5456	27.85	27.4846	28.3529	27.1004	26.7236	26.7576	26.1413	26.8271	27.3038	27.4811	27.1548	27.154	26.4145		26.4234	26.3467	27.1459	26.4969	26.9989	26.6256	cellular macromolecule metabolic process;cellular metabolic process;cellular nitrogen compound metabolic process;cellular process;macromolecule metabolic process;metabolic process;ncRNA metabolic process;ncRNA processing;nitrogen compound metabolic process;nucleic acid metabolic process;nucleobase-containing compound metabolic process;primary metabolic process;RNA metabolic process;RNA processing…	binding;catalytic activity;methyltransferase activity;nucleic acid binding;RNA binding;transferase activity;transferase activity, transferring one-carbon groups		+	8	8	1	32.4	32.4	4.4	33.196	0	18.894	3382300000	37	2.41436	0.0199579
K7LSJ2;I1LII4;A0A0R0HE95;I1LG13;I1JAH7	Uncharacterized protein	100813443 GLYMA_12G018500	26.7349	26.7539	26.1404	27.1287	26.1392	25.9036	26.0988	25.8296	25.8918	25.6963	25.6143	25.7487	25.8382	25.9422	25.5593	25.613	25.4778	25.641	25.6417	25.2634	25.7218	25.6763	25.8008	establishment of localization;establishment of localization in cell;establishment of protein localization;intracellular protein transport;intracellular transport;protein transport;transport			+	7	7	7	6.7	6.7	6.7	123.99	0	15.291	1451200000	12	2.41026	0.0200922
I1N3A6;C6TFG7;K7MTV2	Alpha-galactosidase (EC 3.2.1.22) (Melibiase)	100812330 GLYMA_18G215700	28.1029	28.0352	27.9184	27.6758	28.3896	27.8825	27.2731	27.7863	27.6546	27.285	27.1666	27.0122	26.9383	27.761	27.2986	27.8191	27.5375	27.0102	27.2576	27.0275	27.3899	26.2473	26.6804	carbohydrate metabolic process;metabolic process;primary metabolic process	alpha-galactosidase activity;catalytic activity;galactosidase activity;hydrolase activity;hydrolase activity, acting on glycosyl bonds;hydrolase activity, hydrolyzing O-glycosyl compounds;raffinose alpha-galactosidase activity		+	8	7	2	25.1	22.9	7.6	45.689	0	43.528	4146300000	69	2.40864	0.0201144
Q45FY8;I1MZ51;Q8H6H7	Coronatine-insensitive 1	COI1 732662 GLYMA_11G227300	26.1233	25.9235	26.4474	25.8032	25.8915	26.6865	26.2858	26.2178	26.3476	27.0632	27.1289	26.7534	26.6866	26.5323	26.1207	26.5785	25.7185	26.4891	26.4059	26.8149	27.0427	27.1892	26.898				+	6	6	5	11.7	11.7	9.8	66.904	0	19.363	2059700000	46	2.40083	0.0204262
I1KEY6	26S proteasome non-ATPase regulatory subunit 2 homolog	100799779 GLYMA_06G289400	30.0742	29.6131	29.7918	29.8429	29.5665	29.3913	29.4428	29.5306	29.7605	29.5103	29.4414	29.6775	29.4006	29.2672	28.9453	29.3406	29.2457	29.2564	29.117	29.1637	29.5441	29.3903	29.2604	biological regulation;regulation of biological process;regulation of catabolic process;regulation of macromolecule metabolic process;regulation of metabolic process;regulation of primary metabolic process;regulation of protein catabolic process;regulation of protein metabolic process	enzyme regulator activity	cell part;intracellular part;macromolecular complex;proteasome complex;protein complex	+	23	23	2	28.1	28.1	1.5	97.347	0	91.841	15570000000	203	2.39955	0.020433
C6SXX5	Uncharacterized protein	100306088 GLYMA_08G016600	27.489	27.3326		26.9286	26.939	27.3094	26.7976	26.46	27.1882	26.4573	25.9018		25.3888	25.8474	26.8069	26.1264	26.9596	26.5004	26.7732	26.3448	26.6869		26.0471				+	4	4	3	20.6	20.6	15.3	27.597	0	10.934	2371300000	42	2.39154	0.0207337
E2FKI5	Sieve element occlusion m	SEOm 100801064 Glyma16g07300 GLYMA_16G067700	26.4075	26.3027	25.4781	24.6555	25.8383	25.975	24.628	25.0189	24.6252	24.3894	23.6422	24.5025	23.8265	24.341		24.3441	24.68				24.1112						+	5	5	5	9.8	9.8	9.8	83.608	0	21.151	564060000	16	2.38872	0.0207337
I1J8V9;I1J8W0;A0A0R0LCB5	Succinate dehydrogenase [ubiquinone] flavoprotein subunit, mitochondrial (EC 1.3.5.1)	100803020 GLYMA_01G175600	31.436	31.3195	31.1989	31.6558	31.58	31.2694	31.8651	31.5656	31.6344	31.602	31.6911	31.711	31.9168	31.7543	31.6612	31.9808	31.7278	31.55	31.3486	31.3265	31.5377	31.5234	31.4105	acetyl-CoA catabolic process;acetyl-CoA metabolic process;catabolic process;cellular catabolic process;cellular metabolic process;cellular process;coenzyme catabolic process;coenzyme metabolic process;cofactor catabolic process;cofactor metabolic process;electron transport chain;generation of precursor metabolites and energy;metabolic process;oxidation-reduction process;tricarboxylic acid cycle	binding;catalytic activity;coenzyme binding;cofactor binding;flavin adenine dinucleotide binding;oxidoreductase activity;oxidoreductase activity, acting on the CH-CH group of donors		+	19	19	4	42.4	42.4	11	69.3	0	323.31	70781000000	420	2.38946	0.0207337
I1M1V8;I1M1V9	Uncharacterized protein	100809553 GLYMA_13G231700	28.4374	28.43	28.3532	28.4082	28.8726	28.8707	28.0915	28.2189	28.4594	28.15	29.0506	28.99	28.9202	28.5746	29.2356	28.9085	28.9061	29.5807	29.278	29.1684	29.2855	29.456	28.7767		binding;carbon-carbon lyase activity;carboxy-lyase activity;catalytic activity;cation binding;coenzyme binding;cofactor binding;ion binding;lyase activity;magnesium ion binding;metal ion binding;thiamine pyrophosphate binding;vitamin binding		+	13	13	12	28.4	28.4	26.1	63.41	0	277.76	10280000000	232	2.39026	0.0207337
C6T2H1;A0A0R4J559;I1ME74;I1M2F5	Uncharacterized protein	100500685 GLYMA_13G249600	32.1347	32.0661	32.3009	31.9646	32.1793	32.1542	31.3605	31.6611	32.0748	30.4665	31.2272	30.1432	31.149	31.4752	31.105	31.2553	32.3207	31.4212	31.2854	31.2515	31.4339	30.2552	31.0113	biological regulation;negative regulation of biological process;negative regulation of biosynthetic process;negative regulation of cellular biosynthetic process;negative regulation of cellular macromolecule biosynthetic process;negative regulation of cellular metabolic process;negative regulation of cellular process;negative regulation of gene expression;negative regulation of macromolecule biosy…	binding;catalytic activity;coenzyme binding;cofactor binding;FMN binding;nucleotide binding;oxidoreductase activity		+	10	10	5	49.3	49.3	33	21.666	0	184.33	68108000000	266	2.38718	0.020754
C6TLC2	Uncharacterized protein	100784610 GLYMA_06G320200	27.0586	26.9733	27.3482	27.2555	26.9858	26.0444	26.5328	26.8818	26.0173	26.0059	26.2753	25.293	26.1465	25.8629	25.9872	25.4089	25.4664	25.6936	25.8032	25.805	25.7294	25.2905	26.3888				+	5	5	3	21.9	21.9	9.9	37.88	0	22.804	1807500000	38	2.38012	0.0209332
I1KRU6;C6TIA9;I1KRV0;A0A0R0IPJ7	Uncharacterized protein	100170736 GLYMA_08G096800	27.3481	26.9909	27.6763	27.3099	27.022	26.4971	27.6871	27.6998	28.1433	27.8998	27.8842	28.3131	28.2213	27.582	27.481	28.0246	27.8963	27.9238	28.4001	28.2964	27.9969	27.6747	27.5228		binding;catalytic activity;coenzyme binding;cofactor binding;FMN binding;nucleotide binding;oxidoreductase activity		+	9	9	9	27.8	27.8	27.8	40.672	0	41.255	4968500000	35	2.38144	0.0209332
I1LHN4	Uncharacterized protein	100803268 GLYMA_11G064500	27.6198	27.3404	26.9938	27.9265	27.2602	27.6745	27.8113	27.4927	27.7304	28.8087	28.281	27.8326	28.136	27.9651	27.9519	27.9527	27.8479	28.2011	28.4766	28.1982	28.2704	28.3096	29.209		binding;catalytic activity;cation binding;hydrolase activity;ion binding;metal ion binding		+	13	4	4	25.9	5.9	5.9	73.197	0	10.795	5533200000	22	2.38089	0.0209332
C6TAU4;I1KZZ6	Uncharacterized protein	100783793 GLYMA_09G010500	30.4022	30.5884	30.7483	30.9496	30.3378	30.7653	30.4288	30.9231	30.798	31.4622	31.4016	31.3336	30.4434	31.2512	30.2417	30.5882	29.9201	31.4966	31.248	31.0637	31.1988	30.9681	31.9469				+	12	12	10	73	73	70.1	18.8	0	323.31	41857000000	299	2.35819	0.0219616
C6SZ81;C6SXB4	Uncharacterized protein	100306401 GLYMA_13G051200	28.8736	28.8076	27.9423	28.6535	28.6187	28.4909	28.2172	28.2781	28.0769	28.5564	28.2379	28.8411	28.3062	28.278	28.3397	28.3357	28.0947	27.5633	27.6195	27.6656	28.1076	28.4862	28.1931	biosynthetic process;cellular biosynthetic process;cellular macromolecule biosynthetic process;cellular macromolecule metabolic process;cellular metabolic process;cellular process;cellular protein metabolic process;macromolecule biosynthetic process;macromolecule metabolic process;metabolic process;primary metabolic process;protein metabolic process;translation	structural constituent of ribosome;structural molecule activity	cell part;cytoplasmic part;intracellular non-membrane-bounded organelle;intracellular organelle;intracellular part;macromolecular complex;non-membrane-bounded organelle;organelle;ribonucleoprotein complex;ribosome	+	6	6	2	38.3	38.3	18	15.571	0	28.408	7470300000	84	2.3524	0.0221999
A0A0R0GG96;K7MP05	Uncharacterized protein	100787098 GLYMA_14G217300	26.0893	25.674	25.6886	26.0857	26.0828	26.4239	26.3594	25.8449	26.224	25.7794	26.465	26.2041	26.3622	26.4396	26.7524	26.2662	26.0387	27.1688	26.8146	26.8243	26.4663	26.5087	26.3323	metabolic process			+	9	9	7	19.6	19.6	15.8	54.666	0	19.337	1754400000	49	2.34797	0.022371
I1JDS6	Beta-hexosaminidase (EC 3.2.1.52)	100790700 GLYMA_02G095200	28.8285	28.9053	28.8742	29.06	29.1122	28.8724	29.1487	29.1243	29.1796	29.1304	29.02	29.1451	29.342	29.1669	29.4157	29.3497	29.9208	29.1843	29.2534	29.2345	29.3241	28.8466	29.075	carbohydrate metabolic process;metabolic process;primary metabolic process	beta-N-acetylhexosaminidase activity;catalytic activity;hexosaminidase activity;hydrolase activity;hydrolase activity, acting on glycosyl bonds;hydrolase activity, hydrolyzing O-glycosyl compounds		+	10	10	2	22.5	22.5	3.8	62.908	0	260.78	12365000000	169	2.34065	0.0225235
I1K517;A0A0R0JYD8;A0A0R0K3Q8	Uncharacterized protein	100792894 GLYMA_05G194400	26.4447	25.7758	26.2025	25.795	26.3562	26.3247	26.6517	26.3788	26.9372	27.4528	26.8707	27.256	26.7033	27.1192	26.5668	27.1932	27.0724	26.7677	27.1502	26.7376	26.7303	27.3319	26.8989				+	9	6	6	20.1	17.4	17.4	47.055	0	59.838	2384600000	32	2.34261	0.0225235
I1LVI3	Uncharacterized protein	100798346 GLYMA_12G242300	28.1994	28.2819	27.6747	27.953	27.6521	28.4014	27.6144	27.6784	27.3809	27.8181	27.7018	27.8455	27.7217	27.5978	27.2066	27.3885	26.9254	27.6103	27.8531	27.6071	27.935	28.0036	27.8401		binding;catalytic activity;GTP binding;GTPase activity;guanyl nucleotide binding;guanyl ribonucleotide binding;hydrolase activity;hydrolase activity, acting on acid anhydrides;hydrolase activity, acting on acid anhydrides, in phosphorus-containing anhydrides;nucleoside-triphosphatase activity;nucleotide binding;purine nucleotide binding;purine ribonucleoside triphosphate binding;purine ribonucleo…		+	14	14	3	17.7	17.7	3.6	100.15	0	73.268	5496200000	89	2.34358	0.0225235
K7M9T4;I1KUB2	Uncharacterized protein	100806355 GLYMA_15G056100	26.4863	26.2583	25.8963	25.8103	26.1593	25.7927	24.8989	24.9823				25.1349		24.8272	25.6083						25.2853			cellular macromolecule metabolic process;cellular metabolic process;cellular nitrogen compound metabolic process;cellular process;macromolecule metabolic process;macromolecule modification;metabolic process;nitrogen compound metabolic process;nucleic acid metabolic process;nucleobase-containing compound metabolic process;primary metabolic process;pseudouridine synthesis;RNA metabolic process;RNA …	binding;catalytic activity;intramolecular transferase activity;isomerase activity;nucleic acid binding;pseudouridine synthase activity;RNA binding		+	5	5	5	12.2	12.2	12.2	66.246	0	9.4569	671210000	9	2.34144	0.0225235
I1LKZ4;A0A0R0HJA5;I1LKZ3;I1LKZ2;C6TFH5;A0A0R0H3D3;I1LR93	Superoxide dismutase [Cu-Zn]	100815376 GLYMA_11G192700	29.3375	29.1528	29.8038	29.7206	29.3284	29.2972	29.087	29.2415	29.2893	28.8688	28.5335	28.5047	28.4631	28.9066	28.8431	29.0734	28.4901	28.4308	28.8604	28.1757	28.6697	28.169	29.0427	catabolic process;cellular catabolic process;cellular metabolic process;cellular process;metabolic process;secondary metabolic process;toxin catabolic process;toxin metabolic process	antioxidant activity;binding;catalytic activity;cation binding;ion binding;metal ion binding;oxidoreductase activity;oxidoreductase activity, acting on superoxide radicals as acceptor;superoxide dismutase activity	apoplast;cell part;chloroplast part;chloroplast stroma;cytoplasmic part;extracellular region;intracellular organelle part;intracellular part;organelle part;plastid part;plastid stroma;thylakoid	+	5	5	5	31	31	31	20.83	0	323.31	10810000000	119	2.33763	0.022624
I1J7M4;C6TMV5	Peroxidase (EC 1.11.1.7)	100814067 GLYMA_01G130800							25.8535	26.3769	25.8076	26.5075	27.2179	27.6808	27.1258	27.5265		27.556	27.3871	27.7824	26.9699	28.0566	27.9234	27.8091	28.7565	response to chemical stimulus;response to oxidative stress;response to stimulus;response to stress	antioxidant activity;binding;catalytic activity;cation binding;heme binding;ion binding;iron ion binding;metal ion binding;oxidoreductase activity;oxidoreductase activity, acting on peroxide as acceptor;peroxidase activity;tetrapyrrole binding;transition metal ion binding	extracellular region	+	12	5	4	52	27	18.5	34.64	0	36.329	2584700000	33	2.33546	0.0226811
A0A0R0I0B9;C6SW15	Uncharacterized protein	100799156 GLYMA_10G133100 GLYMA_20G083300	31.3139	31.3766	31.007	31.2027	31.1708	31.2706	31.0688	30.9048	30.6852	30.7362	30.8374	31.1991	30.9704	30.895	30.7335	30.7334	30.1603	30.5204	30.7545	30.5412	30.6679	30.9468	30.7276	biosynthetic process;cellular biosynthetic process;cellular macromolecule biosynthetic process;cellular macromolecule metabolic process;cellular metabolic process;cellular process;cellular protein metabolic process;macromolecule biosynthetic process;macromolecule metabolic process;metabolic process;primary metabolic process;protein metabolic process;translation	binding;nucleic acid binding;RNA binding;structural constituent of ribosome;structural molecule activity	cell part;intracellular organelle part;intracellular part;macromolecular complex;organelle part;ribonucleoprotein complex;small ribosomal subunit	+	15	15	2	61.9	61.9	14.8	26.306	0	85.942	42307000000	347	2.32666	0.0230304
I1JUD5;A0A0R0JKX7;A0A0R0J4Q6;I1KVD4;A0A0R0J4W7;Q9LFN6;Q56XG6;C6TJB8	Uncharacterized protein	100808957 GLYMA_04G067600	29.4577	29.3757	29.0686	29.2126	29.2453	28.8631	29.0481	29.1579	28.9732	28.1743	28.7434	28.4948	28.7616	28.8991	28.6148	28.8813	28.1654	28.7764	28.581	28.1696	28.4876	28.6175	27.832		adenyl nucleotide binding;adenyl ribonucleotide binding;ATP binding;binding;catalytic activity;helicase activity;hydrolase activity;hydrolase activity, acting on acid anhydrides;hydrolase activity, acting on acid anhydrides, in phosphorus-containing anhydrides;nucleic acid binding;nucleoside-triphosphatase activity;nucleotide binding;purine nucleotide binding;purine ribonucleoside triphosphate bi…		+	10	10	10	35.4	35.4	35.4	48.261	0	135.41	10682000000	84	2.32746	0.0230304
A0A0R0EY92;K7MQS5;C6THW7;A0A0R0F7V6;I1N0K1	Uncharacterized protein	GLYMA_18G091500	27.6049	26.9459	27.3825	27.0183	26.7398	26.7782	27.3769	26.8156	27.0377	26.31	26.5281	26.5466	26.7	26.6939	26.9006	26.5789	26.8334	26.6905	27.0284	26.7591	26.6976	26.7925	26.6046		binding;catalytic activity;coenzyme binding;cofactor binding		+	8	7	7	31.4	28.6	28.6	35.786	0	214.77	2473300000	57	2.32057	0.0231835
I1NBF8;I1J585;I1K1H8;Q9ZPJ2;C6SV58;I1NBF7;I1N5H2;C6SXM4;A0A0R0I1I9;A0A0R0HMR0;I1J584;C6T5A1;A0A0R0KXC5;A0A0R0F1J0;I1K1H6;I1L0L6;C6SXV3	Uncharacterized protein	100797931 GLYMA_19G219200	30.5009	30.2331	30.5426	30.771	30.3321	29.7076	30.6494	30.1981	29.7467	30.0034	29.8464	29.9893	30.1371	29.9628	29.6176	29.9018	29.341	29.8673	29.5512	29.869	29.3393	29.2617	29.2452	biological regulation;cellular process;cellular response to stimulus;intracellular signal transduction;regulation of biological process;regulation of cellular process;response to stimulus;signal transduction;small GTPase mediated signal transduction	binding;GTP binding;guanyl nucleotide binding;guanyl ribonucleotide binding;nucleotide binding;purine nucleotide binding;purine ribonucleoside triphosphate binding;purine ribonucleotide binding;ribonucleotide binding	cell part;intracellular	+	9	9	9	71.2	71.2	71.2	17.678	0	161.05	26525000000	241	2.3214	0.0231835
I1LKM5	Uncharacterized protein	100817682 GLYMA_11G179300	33.2106	33.4639	32.887	32.7524	33.3523	33.4581	32.4324	32.9665	32.7353	32.4802	32.4701	32.1123	32.3598	32.6688	32.3382	32.3384	32.6419	32.8661	32.7103	32.5825	32.5395	31.9444	32.5306		binding;catalytic activity;coenzyme binding;cofactor binding;flavin adenine dinucleotide binding;oxidoreductase activity		+	23	23	14	57.2	57.2	30.6	39.295	0	323.31	147570000000	527	2.32259	0.0231835
A0A0R0JRB0;I1MUZ7	L-lactate dehydrogenase (EC 1.1.1.27)	GLYMA_05G058100	26.9681	27.0821	26.2902		27.4269	27.4972	26.4255	27.008	26.7054	27.2325	27.1521	27.112	27.0313	27.1452	27.0322	27.2785	26.7083	27.6613	27.4267	27.4188	27.628	28.0697	27.3924	carbohydrate metabolic process;carboxylic acid metabolic process;cellular ketone metabolic process;cellular metabolic process;cellular process;metabolic process;organic acid metabolic process;oxoacid metabolic process;primary metabolic process;small molecule metabolic process	catalytic activity;lactate dehydrogenase activity;L-lactate dehydrogenase activity;oxidoreductase activity;oxidoreductase activity, acting on CH-OH group of donors;oxidoreductase activity, acting on the CH-OH group of donors, NAD or NADP as acceptor	cell part;cytoplasm;intracellular part	+	4	4	2	13.2	13.2	7.4	37.801	0	13.496	2952400000	45	2.31475	0.0234388
I1KXG9	Uncharacterized protein	100811891 GLYMA_08G288000	30.27	30.1809	30.6963	30.385	30.3453	30.0783	30.3775	30.299	30.2142	30.3817	30.2049	30.1099	30.3794	30.3485	30.5752	30.3924	30.4201	29.8721	29.9215	29.7367	30.2172	29.9171	30.1487		catalytic activity;oxidoreductase activity;oxidoreductase activity, acting on the aldehyde or oxo group of donors;oxidoreductase activity, acting on the aldehyde or oxo group of donors, NAD or NADP as acceptor		+	16	16	2	35.1	35.1	6.3	58.387	0	191.02	27580000000	177	2.3116	0.0235519
C6KXH6;C4T848	Protein disulfide isomerase L-3b	PDIL-3b GLYMA_15G015700	24.869	24.9176	24.8559	24.84			25.2726	24.851	24.9228	25.083	25.038	25.189	25.2377	25.3389	25.1932	25.2054	24.8296	25.2995		25.5556	24.8292	24.7716	24.5486	biological regulation;cell redox homeostasis;cellular homeostasis;cellular process;homeostatic process;regulation of biological process;regulation of biological quality;regulation of cellular process	catalytic activity;isomerase activity		+	3	3	3	6.7	6.7	6.7	58.804	0	7.5102	688330000	13	2.30019	0.0241197
I1JAF7;I1LG61;I1LIM0;I1LPD3;I1LPD4	Beta-adaptin-like protein	100777522 GLYMA_01G227000	27.9125	27.8416	27.6851	27.7482	28.1866	27.9382	27.7382	27.693	27.3258	27.5931	27.2807	28.0112	27.4814	27.494	27.3076	27.091	27.2115	27.3804	27.6007	27.6146	27.1583	27.2097	27.4245	cellular process;establishment of localization;establishment of localization in cell;establishment of protein localization;intracellular protein transport;intracellular transport;protein transport;transport;vesicle-mediated transport	protein transporter activity;substrate-specific transporter activity;transporter activity	AP-type membrane coat adaptor complex;cell part;clathrin adaptor complex;cytoplasmic part;intracellular part;macromolecular complex;membrane part;protein complex	+	10	10	10	12.1	12.1	12.1	99.082	0	22.311	4229700000	44	2.2986	0.0241491
K7LD45;K7MZW1;C6SVS8	Uncharacterized protein	GLYMA_09G108500	27.506	28.2571	28.5359	27.7115	27.5164	27.6413	28.4652	28.281	28.4415		27.9746	27.4028	28.1773	27.7615	28.3003	27.9416	27.7516	26.8909		27.0099	27.7312	27.0289	27.4143	biosynthetic process;cellular biosynthetic process;cellular macromolecule biosynthetic process;cellular macromolecule metabolic process;cellular metabolic process;cellular process;cellular protein metabolic process;macromolecule biosynthetic process;macromolecule metabolic process;metabolic process;primary metabolic process;protein metabolic process;translation	structural constituent of ribosome;structural molecule activity	cell part;cytoplasmic part;intracellular non-membrane-bounded organelle;intracellular organelle;intracellular part;macromolecular complex;non-membrane-bounded organelle;organelle;ribonucleoprotein complex;ribosome	+	3	3	0	24	24	0	10.941	0	5.6725	4663600000	23	2.29537	0.0242497
I1LQ56;C6TNI8	Uncharacterized protein	100809530 GLYMA_12G045300	29.0327	29.1053	29.2833	29.1936	29.4764	29.3085	29.2188	29.5741	28.9342	28.749	28.96	28.5659	28.6231	28.9282	28.6722	28.9704	29.3166	28.7754	28.7669	28.4617	28.5743	28.3117	28.719	biological regulation;negative regulation of biological process;negative regulation of biosynthetic process;negative regulation of cellular biosynthetic process;negative regulation of cellular macromolecule biosynthetic process;negative regulation of cellular metabolic process;negative regulation of cellular process;negative regulation of gene expression;negative regulation of macromolecule biosy…	binding;catalytic activity;coenzyme binding;cofactor binding;FMN binding;nucleotide binding;oxidoreductase activity		+	10	7	7	47.2	35.4	35.4	27.082	0	309.77	10909000000	160	2.29469	0.0242497
Q6S9W0;I1LIL5;C6TGA8;O49016;O49013	Endo-1,3-beta-glucanase						26.2629		26.9626	27.6608	27.4087	30.1325	28.5461	29.7822	28.4736	27.6188	27.748	27.3148	26.5508	28.1288	29.4785	28.4544	28.2395	28.1048	28.0193	carbohydrate metabolic process;metabolic process;primary metabolic process	catalytic activity;hydrolase activity;hydrolase activity, acting on glycosyl bonds;hydrolase activity, hydrolyzing O-glycosyl compounds		+	6	6	6	27.1	27.1	27.1	36.603	0	71.543	5528000000	79	2.28869	0.0244034
I1K0W4;Q5F2M8;I1MV76;A0A0R0FNT7;I1J9Q7	Glutamate dehydrogenase	100793231 GLYMA_05G066200	25.7659		26.4293	26.3985	26.3209		27.3714	26.9569		26.8199	27.2243		27.4625	27.1669	27.0077	27.2886	27.3314	27.1018	26.8207	26.4631	26.6927	26.8713	26.5875	amine metabolic process;carboxylic acid metabolic process;cellular amine metabolic process;cellular amino acid metabolic process;cellular ketone metabolic process;cellular metabolic process;cellular nitrogen compound metabolic process;cellular process;metabolic process;nitrogen compound metabolic process;organic acid metabolic process;oxoacid metabolic process;primary metabolic process;small mole…	catalytic activity;oxidoreductase activity;oxidoreductase activity, acting on the CH-NH2 group of donors;oxidoreductase activity, acting on the CH-NH2 group of donors, NAD or NADP as acceptor		+	9	5	5	23.8	11.4	11.4	44.876	0	7.5394	2604300000	19	2.28874	0.0244034
I1KUN7;I1LTF6	Uncharacterized protein	100812259 GLYMA_08G188300	26.3795	26.4411	25.965	26.3482	26.2188	26.2303	26.0554	26.9068	26.6929	27.0943	27.1055	26.7628	26.5926	26.5437	26.4012	26.4519	26.4957	27.143	26.9104	26.9033	26.6641	26.9431			adenyl nucleotide binding;adenyl ribonucleotide binding;ATP binding;binding;catalytic activity;kinase activity;nucleotide binding;phosphotransferase activity, alcohol group as acceptor;protein kinase activity;purine nucleotide binding;purine ribonucleoside triphosphate binding;purine ribonucleotide binding;ribonucleotide binding;transferase activity;transferase activity, transferring phosphorus-c…		+	7	7	3	28.1	28.1	14.8	40.262	0	33.449	2289300000	48	2.28776	0.0244034
I1LZE1;I1L964	Pyruvate kinase (EC 2.7.1.40)	100802271 GLYMA_13G149800	28.3092	28.4003	28.1907	28.4273	28.3382	28.243	28.4194	28.4265	28.6766	28.5586	28.724	28.8369	28.7962	28.2989	28.7519	28.3867	28.8037	28.7601	28.6851	28.9532	28.8055	28.8984	28.897	alcohol catabolic process;alcohol metabolic process;carbohydrate catabolic process;carbohydrate metabolic process;catabolic process;cellular carbohydrate catabolic process;cellular carbohydrate metabolic process;cellular metabolic process;cellular process;generation of precursor metabolites and energy;glucose catabolic process;glucose metabolic process;glycolysis;hexose catabolic process;hexose m…	alkali metal ion binding;binding;catalytic activity;cation binding;ion binding;kinase activity;magnesium ion binding;metal ion binding;phosphotransferase activity, alcohol group as acceptor;potassium ion binding;pyruvate kinase activity;transferase activity;transferase activity, transferring phosphorus-containing groups		+	10	9	4	21.3	18.8	9.7	57.604	0	319.18	8295100000	82	2.28925	0.0244034
I1KJR2	Uncharacterized protein	100819533 GLYMA_07G125400		26.6087	26.5613	26.2923	26.3116	26.4229	26.7249	26.6349	26.4345	26.1872	26.2799	26.2264	26.2403					25.9977				26.1253		amine metabolic process;amino acid activation;arginyl-tRNA aminoacylation;carboxylic acid metabolic process;cellular amine metabolic process;cellular amino acid metabolic process;cellular ketone metabolic process;cellular macromolecule metabolic process;cellular metabolic process;cellular nitrogen compound metabolic process;cellular process;macromolecule metabolic process;metabolic process;ncRNA …	adenyl nucleotide binding;adenyl ribonucleotide binding;aminoacyl-tRNA ligase activity;arginine-tRNA ligase activity;ATP binding;binding;catalytic activity;ligase activity;ligase activity, forming aminoacyl-tRNA and related compounds;ligase activity, forming carbon-oxygen bonds;nucleotide binding;purine nucleotide binding;purine ribonucleoside triphosphate binding;purine ribonucleotide binding;ri…	cell part;cytoplasm;intracellular part	+	6	6	4	11.9	11.9	8	67.827	0	11.167	1445600000	7	2.2855	0.0244722
I1LEV4;I1LEV5	Uncharacterized protein	100812875 GLYMA_10G272800	28.6896	28.5106	28.516	28.1341	28.562	28.5914	28.3598	28.3432	28.4379	28.3337	28.2026	28.5109	28.1509	28.2609	28.3613	28.4949	28.3627	28.0198	27.8448	28.1557	28.2066	28.1806	27.9146	amine metabolic process;amino acid activation;carboxylic acid metabolic process;cellular amine metabolic process;cellular amino acid metabolic process;cellular ketone metabolic process;cellular macromolecule metabolic process;cellular metabolic process;cellular nitrogen compound metabolic process;cellular process;glutaminyl-tRNA aminoacylation;macromolecule metabolic process;metabolic process;ncR…	adenyl nucleotide binding;adenyl ribonucleotide binding;aminoacyl-tRNA ligase activity;ATP binding;binding;catalytic activity;glutamine-tRNA ligase activity;ligase activity;ligase activity, forming aminoacyl-tRNA and related compounds;ligase activity, forming carbon-oxygen bonds;nucleotide binding;purine nucleotide binding;purine ribonucleoside triphosphate binding;purine ribonucleotide binding;r…	cell part;cytoplasm;intracellular part	+	13	13	5	17.1	17.1	5.9	90.24	0	75.017	7065800000	69	2.28292	0.0245591
K7MZJ0;K7MZJ1	Sucrose synthase (EC 2.4.1.13)	100802045 GLYMA_19G212800	31.5092	31.4279	31.3017	31.1414	31.4268	31.1775	31.1935	31.5791	31.5861	31.8164	31.8599	31.9386	31.7222	31.6424	31.7768	31.7125	31.788	31.6422	31.4055	31.3025	31.9107	31.3671	31.6092	biosynthetic process;carbohydrate metabolic process;cellular carbohydrate metabolic process;cellular metabolic process;cellular process;disaccharide metabolic process;glycoside metabolic process;metabolic process;oligosaccharide metabolic process;primary metabolic process;sucrose metabolic process	catalytic activity;glucosyltransferase activity;sucrose synthase activity;transferase activity;transferase activity, transferring glycosyl groups;transferase activity, transferring hexosyl groups;UDP-glucosyltransferase activity;UDP-glycosyltransferase activity		+	29	27	7	32.1	29.8	9.6	92.254	0	176.18	67722000000	400	2.27656	0.024862
A0A0R0EGP5;I1NJ39	Uncharacterized protein	100793575 GLYMA_20G238400	26.9195	26.8978	26.9836	26.3041	27.182	26.8429	26.6783	26.3872	26.2971	25.9642	25.8857	25.8376	26.3154	25.8675	26.2545	26.0239	25.7653	26.0171	26.9412	26.0012	26.0846	26.0687	26.1653	biological regulation;regulation of biological process;regulation of biosynthetic process;regulation of cellular biosynthetic process;regulation of cellular macromolecule biosynthetic process;regulation of cellular metabolic process;regulation of cellular process;regulation of gene expression;regulation of macromolecule biosynthetic process;regulation of macromolecule metabolic process;regulation…			+	9	8	1	10.6	9.7	1.1	117.44	0	59.339	1843200000	38	2.26744	0.0253295
A0A0R0JRW7;A0A0R0JRZ5;Q9ZRD9	Uncharacterized protein	GLYMA_05G070300	28.114	27.6804	25.6532	27.4979	27.3575	26.985	25.1779	25.8028	25.7872	25.4195	25.5052	26.4925	25.6952	25.184		25.1426		25.4533	25.6068	25.0269	25.4972	25.4731	25.5067				+	3	3	2	48.3	48.3	33.9	13.47	0	25.599	1737400000	26	2.26514	0.0254036
I1MFJ1;A0A0R0GA69;I1KZU7	Uncharacterized protein	100801598 GLYMA_15G110200	25.7521	26.0739	25.7958	25.1957	26.1198	25.2641	24.9441	25.0131	25.2505	25.0101			24.6961	24.4257	24.7174		24.8068						24.4356	lipid metabolic process;metabolic process;primary metabolic process	aspartic-type endopeptidase activity;aspartic-type peptidase activity;catalytic activity;endopeptidase activity;hydrolase activity;peptidase activity;peptidase activity, acting on L-amino acid peptides		+	5	4	4	11.8	10.3	10.3	55.241	0	7.6224	524520000	11	2.2597	0.0255569
Q587K1;I1KPN5;Q39830	BiP	Gm bip	31.7987	31.7849	32.0586	31.9984	31.9211	32.1993	31.8977	32.003	31.8996	32.0912	32.3778	32.2226	32.3346	32.1619	32.3323	32.1943	31.9789	32.2426	32.3618	32.235	32.3025	32.2453	32.2301		adenyl nucleotide binding;adenyl ribonucleotide binding;ATP binding;binding;nucleotide binding;purine nucleotide binding;purine ribonucleoside triphosphate binding;purine ribonucleotide binding;ribonucleotide binding		+	32	30	3	48.8	46.3	6.7	73.594	0	323.31	96485000000	672	2.25977	0.0255569
I1KQ89;I1K5N3	Uncharacterized protein	100812251 GLYMA_08G043800	25.81	26.0824	26.2502	25.5562	25.3244	25.031	24.6559		25.1604		24.4961		25.1637	25.0252			24.6516	25.0753	24.7609				24.6093		carboxylic ester hydrolase activity;catalytic activity;enzyme inhibitor activity;enzyme regulator activity;hydrolase activity;hydrolase activity, acting on ester bonds;pectinesterase activity		+	2	2	2	15.9	15.9	15.9	22.804	0	55.268	675670000	16	2.25945	0.0255569
I1JMI9	Malic enzyme	100799344 GLYMA_03G102900	28.0095	28.0824	28.1923	28.1747	28.0552	28.6771	28.6047	28.5575	28.5749	28.7604	28.7123	28.5372	28.7787	28.6328	28.348	28.6377	28.7125	28.4317	28.3638	28.5369	28.6442	28.48	28.5989	alcohol catabolic process;alcohol metabolic process;carbohydrate catabolic process;carbohydrate metabolic process;carboxylic acid metabolic process;catabolic process;cellular carbohydrate catabolic process;cellular carbohydrate metabolic process;cellular component organization;cellular component organization at cellular level;cellular component organization or biogenesis;cellular component organi…	adenyl nucleotide binding;adenyl ribonucleotide binding;ATP binding;binding;catalytic activity;cation binding;cobalt ion binding;coenzyme binding;cofactor binding;ion binding;malate dehydrogenase (decarboxylating) activity;malate dehydrogenase activity;malic enzyme activity;metal ion binding;NAD binding;nucleotide binding;oxidoreductase activity;oxidoreductase activity, acting on CH-OH group of d…	cell part;chloroplast;cytoplasmic part;intracellular membrane-bounded organelle;intracellular organelle;intracellular part;membrane-bounded organelle;organelle;plastid	+	10	10	10	20.7	20.7	20.7	68.982	0	132.32	8097300000	107	2.24836	0.0261563
C6TKC9;A0A0R0FXY0	Uncharacterized protein		27.3149	27.4687	27.237	27.4139	27.6029	27.4078	27.6976	27.6748	27.8207	27.4714	27.5856	27.3426	28.2364	27.6084	28.3462	27.8503	28.3657	27.9355	27.513	27.6915	27.9271	27.4561	27.9192		catalytic activity;hydrolase activity;peptidase activity;peptidase activity, acting on L-amino acid peptides;serine hydrolase activity;serine-type peptidase activity		+	11	9	9	25.1	22.7	22.7	55.196	0	61.392	4729800000	69	2.2408	0.0263681
C6TD56	Glyceraldehyde-3-phosphate dehydrogenase (EC 1.2.1.-)	100807342 GLYMA_11G247600		27.4522					27.3581			28.6055	28.83		28.7053	28.1949	30.1433			30.0668	29.6339	30.3261	29.9735		29.6702	alcohol metabolic process;carbohydrate metabolic process;cellular carbohydrate metabolic process;cellular metabolic process;cellular process;glucose metabolic process;hexose metabolic process;metabolic process;monosaccharide metabolic process;primary metabolic process;small molecule metabolic process	binding;catalytic activity;coenzyme binding;cofactor binding;NAD binding;NADP binding;nucleotide binding;oxidoreductase activity;oxidoreductase activity, acting on the aldehyde or oxo group of donors;oxidoreductase activity, acting on the aldehyde or oxo group of donors, NAD or NADP as acceptor		+	21	3	3	71.5	10.3	10.3	37.014	0	7.3483	10818000000	14	2.24252	0.0263681
I1KT86	Uncharacterized protein	100781617 GLYMA_08G140600	24.7043					24.7466	25.815	26.0697	25.8466	26.8576	26.8356	26.6072	25.9414	25.7203	25.796	25.9727	26.1278	26.2401	27.3993	26.6823	26.4555	26.1806	26.5657		binding;catalytic activity;cation binding;heme binding;ion binding;iron ion binding;metal ion binding;monooxygenase activity;oxidoreductase activity;oxidoreductase activity, acting on paired donors, with incorporation or reduction of molecular oxygen;tetrapyrrole binding;transition metal ion binding		+	7	7	7	15.7	15.7	15.7	56.942	0	17.156	1201600000	36	2.24173	0.0263681
I1LXQ1	Uncharacterized protein	100802266 GLYMA_13G010100	27.2476	26.9182	27.2983	27.1743	27.0694	27.4975	27.2796	27.3247	27.1623	27.3186	27.1589	27.3839	27.1726	27.3596	27.4349	27.2512	27.6891	27.7802	27.8078	27.7115	27.2948	27.2103	27.0441		catalytic activity		+	9	9	1	15.9	15.9	1.1	79.55	0	28.39	3513800000	35	2.24346	0.0263681
Q9SDZ0;C6TET4;C6TB98;K7KSG5	Isoflavone reductase homolog 2	IFR2 548027 GLYMA_04G012300	29.9599	29.4317	30.3049	30.3457	30.0028	30.2455	30.9649	30.4713	30.7069	30.3429	31.013	31.1176	31.1646	30.7564	30.6803	31.2217	30.5267	31.153	30.6175	31.0319	31.0324	30.8131	31.0337				+	13	13	12	37.7	37.7	37.7	33.939	0	238.6	35930000000	216	2.23872	0.0263718
I1KBS7;A0A0R0JHX3	Uncharacterized protein	100786707 GLYMA_06G160200	27.4402	27.5921	26.5267	26.8138	27.1091	26.5511	26.2348	26.6296	25.9483	25.9021	25.8721	26.0931	25.9911	26.0234	25.8951	26.1111								establishment of localization;transport		cell part;integral to membrane;intrinsic to membrane;membrane part	+	11	10	3	26	24.6	7.4	62.523	0	44.668	1718200000	25	2.23899	0.0263718
A0A0R0ESZ8;A0A0R0JTV5	Elongation factor 1-alpha	100785429 GLYMA_19G052400	32.18	32.6204	31.9106	32.1181	32.2559	32.5151	32.0781	31.9786	32.1323	31.9816	31.8575	31.6762	32.1615	32.1917	31.9075	31.6191	31.9252	31.9136	31.7026	31.7441	31.8118	31.4478	31.6498		binding;catalytic activity;GTP binding;GTPase activity;guanyl nucleotide binding;guanyl ribonucleotide binding;hydrolase activity;hydrolase activity, acting on acid anhydrides;hydrolase activity, acting on acid anhydrides, in phosphorus-containing anhydrides;nucleic acid binding;nucleoside-triphosphatase activity;nucleotide binding;purine nucleotide binding;purine ribonucleoside triphosphate bind…		+	16	16	1	41.6	41.6	5.4	49.279	0	147.01	88892000000	267	2.23718	0.0264045
I1JHM4;C6TP03	Uncharacterized protein	100783618 GLYMA_02G236700	24.7174	24.9188	24.4349	25.5276	25.3819	24.9951	24.5806		24.6373		24.479	24.5587	24.5466	24.3459	24.62	24.5346		24.5731		24.5659			24.5277		binding;nucleic acid binding;RNA binding;translation factor activity, nucleic acid binding;translation initiation factor activity		+	3	3	1	11.2	11.2	3.7	30.289	0	5.9441	524070000	16	2.23599	0.0264158
I1L5G4;I1LPW4;K7LFD8;P52418;I1JSI1	Amidophosphoribosyltransferase (ATase) (EC 2.4.2.14) (Glutamine phosphoribosylpyrophosphate amidotransferase)	100791919 GLYMA_09G222700	27.0371	27.3359	26.838	27.5168	27.3316	27.3697	27.7184	27.7624	27.1991	27.7594	27.8027	27.6144	27.8523	27.7076	27.8249	27.9291	27.1445	27.9781	27.9612	28.1679	27.6315	27.7848	27.8168	amine metabolic process;biosynthetic process;carboxylic acid metabolic process;cellular amine metabolic process;cellular amino acid metabolic process;cellular aromatic compound metabolic process;cellular biosynthetic process;cellular ketone metabolic process;cellular metabolic process;cellular nitrogen compound biosynthetic process;cellular nitrogen compound metabolic process;cellular process;'de…	4 iron, 4 sulfur cluster binding;amidophosphoribosyltransferase activity;binding;catalytic activity;cation binding;ion binding;iron-sulfur cluster binding;metal cluster binding;metal ion binding;transferase activity;transferase activity, transferring glycosyl groups;transferase activity, transferring pentosyl groups	cell part;chloroplast;cytoplasmic part;intracellular membrane-bounded organelle;intracellular organelle;intracellular part;membrane-bounded organelle;organelle;plastid	+	8	8	8	17.3	17.3	17.3	62.029	0	128.88	4403100000	47	2.23172	0.0266157
B0M1A9;I1NEH3;I1NEH4;I1LAJ0;I1LAJ1;A0A0R0EJP3;C6TI67	Peroxisomal 3-ketoacyl-CoA thiolase	100170734 GLYMA_10G124700	28.0766	28.1612	27.1986	28.1692	28.7219	28.0103	28.6058	28.4794	28.1615	28.6869	28.6298	29.0385	29.2094	28.5609	28.7427	28.7103	28.0841	29.0197	29.0919	29.1378	28.685	29.1204	29.0946		catalytic activity;transferase activity;transferase activity, transferring acyl groups;transferase activity, transferring acyl groups other than amino-acyl groups		+	12	12	12	40.8	40.8	40.8	48.616	0	323.31	11049000000	274	2.22543	0.0268193
C6TID4	Uncharacterized protein	100813682 GLYMA_15G068300	28.9248	28.9195	28.9881	29.1085	28.9204	29.2924	29.1848	29.3751	29.3861	29.4011	29.4019	29.2827	29.1021	29.2761	29.3713	29.23	29.5797	29.2845	29.2593	29.1763	29.206	29.4482	29.3475	multi-organism process;response to biotic stimulus;response to fungus;response to other organism;response to stimulus;response to symbiont;response to symbiotic fungus	binding;catalytic activity;cation binding;ion binding;metal ion binding;oxidoreductase activity;transition metal ion binding;zinc ion binding	cell part;cytoplasmic part;cytosol;intracellular part	+	8	8	8	39.1	39.1	39.1	34.537	0	71.041	12690000000	105	2.22667	0.0268193
I1K7H0;I1K7H1;I1JT00;I1MC13	Uncharacterized protein	100814379 GLYMA_06G021600	28.2507	28.1465	28.1334	28.1052	28.2795	27.8464	27.901	28.0366	28.1435	27.6393	27.9194	28.0403	28.0757	27.6175	27.8077	27.6496	27.4498	27.5539	27.5624	27.6835	27.9302	27.9365	27.9397	biological regulation;regulation of biological process;regulation of catabolic process;regulation of macromolecule metabolic process;regulation of metabolic process;regulation of primary metabolic process;regulation of protein catabolic process;regulation of protein metabolic process	enzyme regulator activity	cell part;intracellular part;macromolecular complex;proteasome complex;protein complex	+	12	12	12	29.2	29.2	29.2	55.584	0	194.61	5262800000	85	2.22582	0.0268193
I1LT62	Uncharacterized protein	100783329 GLYMA_12G156600							26.0825	26.865	26.539	29.3464	28.059	29.199	27.4897	26.2302	26.0294	26.9917	26.8757		28.652	27.698	27.6519	27.276		carbohydrate metabolic process;metabolic process;primary metabolic process	catalytic activity;hydrolase activity;hydrolase activity, acting on glycosyl bonds;hydrolase activity, hydrolyzing O-glycosyl compounds		+	4	4	4	21.5	21.5	21.5	31.508	0	11.468	3302000000	36	2.22254	0.0269367
P93164;A0A0R0GUI6	Gamma-glutamyl hydrolase (EC 3.4.19.9) (Conjugase) (GH) (Gamma-Glu-X carboxypeptidase)		29.0069	28.4612	28.848	28.6225	28.1184	28.4878	27.7461	28.619	28.1843	27.9029	28.349	27.9395	27.9286	28.1854	28.9613	28.3899	28.295	27.7062	27.5116	27.8904	27.9605	27.9291	27.9167	amine metabolic process;carboxylic acid metabolic process;cellular amine metabolic process;cellular amino acid metabolic process;cellular ketone metabolic process;cellular metabolic process;cellular nitrogen compound metabolic process;cellular process;glutamine family amino acid metabolic process;glutamine metabolic process;macromolecule metabolic process;metabolic process;nitrogen compound metab…	catalytic activity;exopeptidase activity;gamma-glutamyl-peptidase activity;hydrolase activity;omega peptidase activity;peptidase activity;peptidase activity, acting on L-amino acid peptides	cell part;cell wall;external encapsulating structure;extracellular region part;extracellular space	+	7	7	7	21.9	21.9	21.9	37.676	0	65.762	6518100000	94	2.21784	0.0271677
A0A0R0IIS7	Uncharacterized protein	100775182 GLYMA_08G004800	28.4302	28.741	27.9578	28.5269	28.9231	28.7472	27.9931	28.2512	27.9302	28.2193	28.1452	27.7974	28.5308	28.3878	28.2928	28.49	28.0909	28.6808	28.5546	28.6713	28.6101	28.6103	28.6677				+	11	11	1	27.2	27.2	2.1	45.433	0	160.64	7336000000	88	2.21478	0.0272979
I1KQI6;I1K5E5	Uncharacterized protein	100794702 GLYMA_08G051900	28.0658	27.8446	28.0588	27.9865	28.0233	28.1368	28.2375	28.0052	27.8232	28.4931	28.0357	28.7759	28.1319	28.0868	28.3356	28.1406	28.0778	28.3876	28.6623	28.5187	28.5392	28.7715	28.424				+	8	8	8	18.9	18.9	18.9	66.346	0	209.42	6559400000	84	2.20964	0.0275601
A0A0R0G6Y4;C6TGN6;A0A0R0G3Z6	Uncharacterized protein	GLYMA_15G042100	26.7461	26.9447	26.6938	26.6413	26.4238	26.0812	26.493	26.5619	26.1089	26.75	26.7436	26.4821	26.3973	26.4517	26.1802	26.1987	26.934	25.9292	25.7316	25.8435	26.3693	26.2385	26.3952		nutrient reservoir activity		+	4	4	4	17	17	17	32.838	0	10.07	1925000000	24	2.20172	0.0280042
I1LKJ7;C6T2C1	Uncharacterized protein			24.8875	25.5099	25.0687	25.5776	25.0239	25.1659	24.9823	25.4221	25.1752	25.4578	25.3819	25.6656	25.1436	25.935	25.8642	25.8518	25.9164	26.1197	26.2194	26.0164	25.2985	25.5927				+	3	3	3	42.7	42.7	42.7	17.157	0	42.02	992890000	32	2.1989	0.0280597
I1LNP2;C6TJ77	Uncharacterized protein	GLYMA_12G001900	25.7985	25.8027		24.3723	24.5028		24.6577	23.9885		24.0113			23.7764	23.9938		24.0617								establishment of localization;transport		cell part;integral to membrane;intrinsic to membrane;membrane part	+	5	3	3	18.4	12.7	12.7	48.91	0	11.413	316290000	6	2.19908	0.0280597
I1MRT3;I1KMP3;C6T692	Uncharacterized protein	100803230 GLYMA_17G035800	28.3466	28.3259	27.4658	27.6164	27.4775	27.8957	27.4055	27.5358	27.1901	27.6825	27.3895	27.3113	27.1409	27.2539	27.2287	26.409	26.7568	26.8467	27.4965	26.9745	26.9206	27.2034	26.2672	alcohol metabolic process;carbohydrate metabolic process;cellular carbohydrate metabolic process;cellular metabolic process;cellular process;galactose metabolic process;hexose metabolic process;metabolic process;monosaccharide metabolic process;primary metabolic process;small molecule metabolic process	adenyl nucleotide binding;adenyl ribonucleotide binding;ATP binding;binding;carbohydrate kinase activity;catalytic activity;galactokinase activity;kinase activity;nucleotide binding;phosphotransferase activity, alcohol group as acceptor;purine nucleotide binding;purine ribonucleoside triphosphate binding;purine ribonucleotide binding;ribonucleotide binding;transferase activity;transferase activit…	cell part;cytoplasm;intracellular part	+	8	8	8	26.4	26.4	26.4	54.19	0	135.78	3732100000	67	2.19528	0.0282317
A0A0R0JI98;A0A0R0JMM2;C6TJH3	Uncharacterized protein	100777627 GLYMA_06G170900	29.4001	29.4797	29.6823	29.3056	29.2604	29.0986	29.152	28.7708	29.0076	28.7936	28.762	28.8115	28.6678	29.1113	28.9764	29.0449	28.5922	28.8187	29.0392	28.6685	28.6167	29.1446	29.048		binding;nucleic acid binding;RNA binding;translation elongation factor activity;translation factor activity, nucleic acid binding	cell part;cytoplasmic part;eukaryotic translation elongation factor 1 complex;intracellular part;macromolecular complex;protein complex	+	10	10	2	50.4	50.4	6.5	25.032	0	323.31	11968000000	106	2.19128	0.0284287
I1J5A5;I1JC17;A0A0R0LCW8	Uncharacterized protein	100786773 GLYMA_01G031500	29.2245	28.368	28.7678	29.0599	28.9514	29.1245	29.3072	29.8944	29.9259	30.0659	29.996	29.5684	29.5443	29.2163	29.2932	29.6185	28.9303	29.5667	29.1096	29.6543	29.7248	29.5403	30.0999		catalytic activity;oxidoreductase activity;oxidoreductase activity, acting on the aldehyde or oxo group of donors;oxidoreductase activity, acting on the aldehyde or oxo group of donors, NAD or NADP as acceptor		+	11	9	8	24.2	20.1	18	58.478	0	87.964	15277000000	79	2.18268	0.028868
K7ML47	Uncharacterized protein	100807820 GLYMA_17G112900	27.1939	26.916	27.5045	27.6826	27.7539	27.8506	28.0671	28.0215	27.9115	28.5728	27.8894	27.7643	27.8923	28.0473	28.4524	28.1989	28.6115	27.479	27.988	28.057	28.0223	27.4428	28.1416		electron carrier activity		+	4	4	4	25.2	25.2	25.2	25.339	0	323.31	5125900000	149	2.18358	0.028868
I1LY74;C6SZM3	Uncharacterized protein	GLYMA_13G111600	25.234	25.043	25.3171	26.1602	25.9352	25.3382	25.8611	25.9016	26.4224	25.9506	25.9727	26.5836	26.4261	26.1185	25.8209	26.3139	25.6978	26.8412	26.3338	26.11	26.8503	26.3656				cell part;cytoplasmic part;cytosol;intracellular part	+	4	4	4	41.5	41.5	41.5	21.828	0	70.774	1472200000	30	2.17722	0.0291683
I1NJ46;I1LB65;I1NJ48	Importin subunit alpha	100797267 GLYMA_20G239200	28.1573	28.0508	28.2208	27.979	28.1207	27.6776	28.0688	27.9166	28.2102	28.1652	28.1085	27.9411	28.1693	27.6734	27.4101	27.5391	27.4845	27.746	27.9775	27.9879	27.9001	27.6354	27.9756	establishment of localization;establishment of localization in cell;establishment of protein localization;intracellular protein transport;intracellular transport;nuclear import;nuclear transport;nucleocytoplasmic transport;protein import;protein import into nucleus;protein targeting;protein transport;transport	protein transporter activity;substrate-specific transporter activity;transporter activity	cell part;cytoplasm;intracellular membrane-bounded organelle;intracellular organelle;intracellular part;membrane-bounded organelle;nucleus;organelle	+	10	10	2	22	22	4.7	58.971	0	54.042	5367500000	65	2.17141	0.0294961
I1LCI1	Uncharacterized protein	100818544 GLYMA_10G193200	29.8738	29.5922	29.8987	30.1658	29.7897	29.4547	30.2849	30.0875	30.017	29.3651	29.7144	29.7737	30.0889	29.9394	29.2656	29.8474	29.3971	29.475	29.2804	29.5088	29.4708	29.3301	29.3978	cellular macromolecule metabolic process;cellular metabolic process;cellular process;cellular protein metabolic process;macromolecule metabolic process;metabolic process;primary metabolic process;protein folding;protein metabolic process;protein refolding	adenyl nucleotide binding;adenyl ribonucleotide binding;ATP binding;binding;nucleotide binding;purine nucleotide binding;purine ribonucleoside triphosphate binding;purine ribonucleotide binding;ribonucleotide binding	cell part;cytoplasm;intracellular part	+	26	26	2	49.9	49.9	4.2	61.431	0	262.05	19665000000	214	2.16787	0.0296714
I1KVL0;C6SW79;C6T064;C6SVV7;A0A0R0G3G4;K7L817	40S ribosomal protein S12	100305687 GLYMA_08G217700	27.145	27.9239	27.723	27.8574	27.6982	26.955	27.2266	26.996	26.7244	26.347	26.417	26.6862	27.2613	27.0051	26.8942	26.8564	26.6294	26.8062	27.0224	26.3634	26.6744			biosynthetic process;cellular biosynthetic process;cellular macromolecule biosynthetic process;cellular macromolecule metabolic process;cellular metabolic process;cellular process;cellular protein metabolic process;macromolecule biosynthetic process;macromolecule metabolic process;metabolic process;primary metabolic process;protein metabolic process;translation	structural constituent of ribosome;structural molecule activity	cell part;cytoplasmic part;intracellular non-membrane-bounded organelle;intracellular organelle;intracellular part;macromolecular complex;non-membrane-bounded organelle;organelle;ribonucleoprotein complex;ribosome	+	4	4	1	32.9	32.9	6.4	14.897	0	11.04	2795400000	27	2.16184	0.0298877
I1KV08	Uncharacterized protein	100794691 GLYMA_08G199900	27.4819	27.3491	27.7083	27.361	27.3095	27.1269	27.3776	27.2981	27.3075	27.1454	27.325	27.3344	27.239	27.0219	26.9047	27.3016	26.9063	27.0867	26.8749	26.9204	26.9748	27.0738	27.2473		binding;catalytic activity;cation binding;endopeptidase activity;hydrolase activity;ion binding;metal ion binding;metalloendopeptidase activity;metallopeptidase activity;peptidase activity;peptidase activity, acting on L-amino acid peptides		+	9	3	3	22.8	8.5	8.5	54.387	0	120.45	3240100000	62	2.16317	0.0298877
I1LD04;I1LD03	Dolichyl-diphosphooligosaccharide--protein glycosyltransferase subunit 1	100814638 GLYMA_10G210300	25.5787		26.2028	26.1254	26.4064		26.1906	26.3066	26.4562		26.4431		26.9299	26.5415		26.3913		27.0826	26.9668	26.8451	26.7695	27.1741		carbohydrate metabolic process;cellular carbohydrate metabolic process;cellular macromolecule metabolic process;cellular metabolic process;cellular process;cellular protein metabolic process;glycosylation;macromolecule glycosylation;macromolecule metabolic process;macromolecule modification;metabolic process;primary metabolic process;protein glycosylation;protein metabolic process;protein modific…	catalytic activity;dolichyl-diphosphooligosaccharide-protein glycotransferase activity;oligosaccharyl transferase activity;transferase activity;transferase activity, transferring glycosyl groups;transferase activity, transferring hexosyl groups	cell part;cytoplasmic part;endoplasmic reticulum membrane;endoplasmic reticulum part;integral to membrane;intracellular organelle part;intracellular part;intrinsic to membrane;membrane;membrane part;organelle membrane;organelle part	+	6	5	0	14.2	14.2	0	49.125	0	14.802	1808100000	23	2.16203	0.0298877
I1JD96	Uncharacterized protein	100778071 GLYMA_02G076500	26.6244	26.2749	26.6232	25.9649	26.167	26.5	26.423	26.5148	26.6935	26.7688	26.8683	27.0259	26.4572	26.6983	26.8649	26.6432	26.6115	26.8013	27.0581	26.5696	26.902	26.9545	26.734		catalytic activity;oxidoreductase activity		+	5	5	5	16.3	16.3	16.3	39.869	0	20.949	2127500000	44	2.15637	0.0299464
I1JRF8;I1NC20;I1NC19	Glutathione synthetase (GSH-S) (EC 6.3.2.3)	100778473 GLYMA_03G240600	29.2142	28.8921	28.9053	28.8918	28.757	28.7638	28.8767	28.9616	28.9392	28.5726	29.0147	28.9706	28.8359	28.9579	28.3353	28.6776	28.839	28.576	28.373	28.3168	28.6304	28.6243	28.4094		acid-amino acid ligase activity;adenyl nucleotide binding;adenyl ribonucleotide binding;ATP binding;binding;catalytic activity;cation binding;glutathione synthase activity;ion binding;ligase activity;ligase activity, forming carbon-nitrogen bonds;metal ion binding;nucleotide binding;purine nucleotide binding;purine ribonucleoside triphosphate binding;purine ribonucleotide binding;ribonucleotide b…		+	12	12	3	26.1	26.1	7.9	61.234	0	84.601	9525000000	170	2.1568	0.0299464
I1JST6	RING-type E3 ubiquitin transferase (EC 2.3.2.27)	100815928 GLYMA_04G016500	27.7086	27.7427	27.0346	26.5327	27.312	27.5613	26.5749	26.8704	26.1431	25.9313	26.2178		26.5289	26.4511	25.8746	25.5426	26.7826	26.2761	26.6625	26.2212	26.3975	26.2788	25.8965		acid-amino acid ligase activity;catalytic activity;ligase activity;ligase activity, forming carbon-nitrogen bonds;small conjugating protein ligase activity;ubiquitin-protein ligase activity		+	10	10	2	17.2	17.2	3	89.207	0	118.38	2443900000	42	2.15908	0.0299464
I1MT43	Uncharacterized protein	100804105 GLYMA_17G076100		24.2817		24.5298	24.4736		24.6406	24.7347	24.754	27.7909	26.1716	27.0317	26.1958	24.911	25.4791	24.9534	24.4442	26.3389	27.0266	25.2994	26.3141	25.1009	25.6547	amine metabolic process;aminoglycan catabolic process;aminoglycan metabolic process;carbohydrate catabolic process;carbohydrate metabolic process;catabolic process;chitin catabolic process;chitin metabolic process;macromolecule catabolic process;macromolecule metabolic process;metabolic process;nitrogen compound metabolic process;polysaccharide catabolic process;polysaccharide metabolic process;p…	catalytic activity;chitinase activity;hydrolase activity;hydrolase activity, acting on glycosyl bonds;hydrolase activity, hydrolyzing O-glycosyl compounds		+	6	6	6	19	19	19	41.252	0	40.904	1194000000	31	2.15656	0.0299464
Q71EW8;I1MKZ0	Methionine synthase	547643 GLYMA_16G038300	32.9543	32.6707	33.1392	32.8693	32.5599	32.7092	33.0548	32.8033	32.8591	32.613	32.945	32.7621	33.0533	33.1131	33.0044	32.8756	33.149	32.6504	32.6056	32.3406	32.5527	32.6722	32.3438	amine biosynthetic process;amine metabolic process;aspartate family amino acid biosynthetic process;aspartate family amino acid metabolic process;biosynthetic process;carboxylic acid biosynthetic process;carboxylic acid metabolic process;cellular amine metabolic process;cellular amino acid biosynthetic process;cellular amino acid metabolic process;cellular biosynthetic process;cellular ketone met…	5-methyltetrahydropteroyltriglutamate-homocysteine S-methyltransferase activity;5-methyltetrahydropteroyltri-L-glutamate-dependent methyltransferase activity;binding;catalytic activity;cation binding;ion binding;metal ion binding;methyltransferase activity;S-methyltransferase activity;transferase activity;transferase activity, transferring one-carbon groups;transition metal ion binding;zinc ion b…		+	39	39	5	60.2	60.2	10	84.281	0	323.31	170500000000	797	2.15624	0.0299464
C6T2B0;I1MWP3;C6SZ77;C6T0M0;C6SYX1;A0A0R0GJB9;C6SXQ2;C6SYX2;A0A0R0KK01;A0A0D6DQH0	Histone H2A	100500629 GLYMA_14G126700	27.118	27.1939	25.8895	25.8541	26.0589	24.903	25.4118	25.5247	25.6006		25.2826	25.2996	25.4436	25.1805	24.1644	25.1699	24.6624				25.0845	24.971			binding;DNA binding;nucleic acid binding	cell part;chromosomal part;intracellular membrane-bounded organelle;intracellular organelle;intracellular organelle part;intracellular part;macromolecular complex;membrane-bounded organelle;nucleosome;nucleus;organelle;organelle part;protein-DNA complex	+	3	2	2	20.3	13.3	13.3	13.698	0	4.2217	1013600000	8	2.15208	0.0300814
I1KLR6;I1M042	Uncharacterized protein	100800145 GLYMA_07G203600	26.4149	26.5767		26.2791	26.1549		25.9237		25.8273		25.9511		26.186	26.1723													+	4	4	4	8.7	8.7	8.7	61.28	0	7.805	1232800000	12	2.15147	0.0300814
K7N0Y5	Uncharacterized protein	100811132 GLYMA_20G024500	27.7822	27.6345	27.9422	27.6866	27.4121	27.922	27.133	27.3841	27.1392	27.5069	27.8773	27.5606	27.426	27.268	27.4984	27.0967	27.1596	27.3116	27.4945	27.4285	27.543	27.8418	27.6317				+	13	13	3	25.6	25.6	8.5	72.475	0	261.43	4033500000	74	2.15196	0.0300814
I1ME25	Uncharacterized protein	100814039 GLYMA_15G059900	30.6036	30.5099	30.975	30.8644	30.9798	30.8633	31.2007	31.074	31.1173	30.9026	31.1864	30.9694	31.4117	31.4091	31.0241	31.2578	31.1122	30.9679	30.658	30.9196	30.7783	31.1379	30.5816	cellular macromolecule metabolic process;cellular metabolic process;cellular process;cellular protein metabolic process;macromolecule metabolic process;metabolic process;primary metabolic process;protein folding;protein metabolic process	adenyl nucleotide binding;adenyl ribonucleotide binding;ATP binding;binding;nucleotide binding;purine nucleotide binding;purine ribonucleoside triphosphate binding;purine ribonucleotide binding;ribonucleotide binding		+	30	29	6	45.3	44.1	8.9	72.469	0	248.41	44886000000	406	2.14845	0.0302257
I1LIG6;I1LIG5	Uncharacterized protein	100797423 GLYMA_11G090900	26.2404	26.5486	26.5786	25.9086	26.5242	27.0346	26.942	26.5614	27.0835	26.2837	26.6462	27.2596	26.9902	27.3994	26.7709	27.6768	26.9759	27.3992	27.2895	27.3843	27.7432	28.063	27.5086	macromolecule metabolic process;metabolic process;primary metabolic process;protein maturation;protein metabolic process	adenyl nucleotide binding;adenyl ribonucleotide binding;ATP binding;ATPase activity;binding;catalytic activity;hydrolase activity;hydrolase activity, acting on acid anhydrides;hydrolase activity, acting on acid anhydrides, in phosphorus-containing anhydrides;iron-sulfur cluster binding;metal cluster binding;nucleoside-triphosphatase activity;nucleotide binding;purine nucleotide binding;purine rib…		+	7	7	7	14.7	14.7	14.7	64.846	0	27.386	2969700000	40	2.14549	0.0303672
C6T2D3	Uncharacterized protein	100500648 GLYMA_09G163700	25.8341	25.8209	26.641	25.5055	25.1964	25.6749	25.7397	25.8902	26.2725		26.5168	26.5929	24.9908	27.0982	27.7128	27.0023	27.0427	27.2114	27.0493	27.0323	26.917	26.5057	26.7986		endopeptidase inhibitor activity;endopeptidase regulator activity;enzyme inhibitor activity;enzyme regulator activity;peptidase inhibitor activity;peptidase regulator activity		+	5	5	5	25.8	25.8	25.8	23.514	0	16.743	2307000000	37	2.14322	0.0304608
A0A0R0GRM4;K7M0Q9	Uncharacterized protein	100786364 GLYMA_13G197200	25.8222			25.246	25.6172		25.444	25.3245	25.3179	25.2192			25.139	25.0611	24.8394	25.0951		25.78		25.7683	24.8647				catalytic activity;hydrolase activity;hydrolase activity, acting on carbon-nitrogen (but not peptide) bonds		+	2	2	2	6.7	6.7	6.7	49.135	0	6.4099	752640000	20	2.12727	0.0315325
C6T827	Pyruvate dehydrogenase E1 component subunit beta (EC 1.2.4.1)	100817577 GLYMA_14G186900	29.9368	29.7366	29.6522	29.9527	29.8378	29.8841	30.3208	29.9798	29.9375	30.0349	30.1649	30.2919	30.3116	30.294	30.212	30.4793	30.1105	30.2038	30.4731	30.1495	30.1845	30.3331	30.0112	acetyl-CoA biosynthetic process;acetyl-CoA biosynthetic process from pyruvate;acetyl-CoA metabolic process;biosynthetic process;carboxylic acid metabolic process;cellular biosynthetic process;cellular ketone metabolic process;cellular metabolic process;cellular process;coenzyme biosynthetic process;coenzyme metabolic process;cofactor biosynthetic process;cofactor metabolic process;metabolic proce…	catalytic activity;oxidoreductase activity;oxidoreductase activity, acting on the aldehyde or oxo group of donors;oxidoreductase activity, acting on the aldehyde or oxo group of donors, disulfide as acceptor;pyruvate dehydrogenase (acetyl-transferring) activity;pyruvate dehydrogenase activity		+	11	11	3	42.5	42.5	14.4	38.624	0	143.64	26293000000	251	2.12579	0.0315724
I1M654;P35055;A0A0R0G797	Oxygen-dependent coproporphyrinogen-III oxidase, chloroplastic	100818277 GLYMA_14G003200	26.315	26.4596	26.7208	26.7656	26.769	26.6381	26.9201	26.3241	26.629	27.1939	27.0013	27.4737	27.0081	27.1873	26.6737	27.3486	26.7186	27.1269	27.3414	27.1753	27.1751	26.8869	27.1567	biosynthetic process;cellular aromatic compound metabolic process;cellular biosynthetic process;cellular metabolic process;cellular nitrogen compound biosynthetic process;cellular nitrogen compound metabolic process;cellular process;chlorophyll biosynthetic process;chlorophyll metabolic process;cofactor biosynthetic process;cofactor metabolic process;heterocycle biosynthetic process;heterocycle m…	binding;catalytic activity;coproporphyrinogen oxidase activity;identical protein binding;oxidoreductase activity;oxidoreductase activity, acting on the CH-CH group of donors;oxidoreductase activity, acting on the CH-CH group of donors, oxygen as acceptor;protein binding;protein dimerization activity;protein homodimerization activity	cell part;chloroplast;cytoplasmic part;intracellular membrane-bounded organelle;intracellular organelle;intracellular part;membrane-bounded organelle;organelle;plastid	+	5	5	5	20.2	20.2	20.2	42.479	0	21.445	2655800000	27	2.12356	0.0316189
I1K096;I1MUN3	Uncharacterized protein	100794470 GLYMA_05G046400	26.8017	26.4464	26.1753	26.6937	26.2717	26.5563	25.8472	26.0392	25.4996		25.9918	26.0389	26.1548	26.5047	25.7349		25.274	25.5695	25.8632	25.9953	25.6887	26.1271					+	7	7	7	14	14	14	61.036	0	16.336	1429400000	25	2.1233	0.0316189
C6TE86;A0A0R0HDJ8	Uncharacterized protein		25.1704	25.9812	25.9562	25.4266	25.7437	25.756	26.2743	25.9943	26.0293	26.1921	25.8852	26.5783	25.9558	26.0635	26.5396	26.1132	26.3351	26.7142	26.844	26.5839	26.5662	26.2394	25.8101		binding;catalytic activity;coenzyme binding;cofactor binding		+	5	5	5	20	20	20	35.995	0	122.64	1471100000	36	2.12016	0.0317812
I7FST9;B1Q2X4;I1JZ42;I1JZ43	Protein disulfide-isomerase (EC 5.3.4.1)	Gm pdil-1 100170705 GLYMA_04G247900	30.5574	30.3843	31.0965	31.0068	30.7385	30.9155	31.1306	30.8315	30.9477	31.0892	31.2134	30.985	31.0436	31.2828	31.4545	31.2254	31.2356	31.2784	31.3418	31.289	31.2335	31.0478	31.1901	biological regulation;cell redox homeostasis;cellular homeostasis;cellular process;homeostatic process;regulation of biological process;regulation of biological quality;regulation of cellular process	catalytic activity;intramolecular oxidoreductase activity;intramolecular oxidoreductase activity, interconverting keto- and enol-groups;intramolecular oxidoreductase activity, transposing S-S bonds;isomerase activity;protein disulfide isomerase activity	cell part;cytoplasmic part;endoplasmic reticulum;intracellular membrane-bounded organelle;intracellular organelle;intracellular part;membrane-bounded organelle;organelle	+	26	26	11	56.4	56.4	25.3	58.714	0	323.31	45678000000	317	2.10928	0.0325182
I1KYP9;A0A0R0J6Q8	Glycosyltransferase (EC 2.4.1.-)	100776274 GLYMA_08G338800	26.3762	26.0475	25.3704	25.9004	25.9734	25.5852	25.9606	26.6637	26.4365	26.53	27.5392	26.6064	26.4232	27.1965	26.117	26.513	26.9576	27.6601	27.1274	27.1621	26.5843	25.939	26.3398		catalytic activity;transferase activity;transferase activity, transferring glycosyl groups;transferase activity, transferring hexosyl groups		+	10	6	5	20.7	12.2	10.3	51.394	0	14.046	2039200000	45	2.10659	0.0326513
I1KVC1;I1KH38	Uncharacterized protein	100782688 GLYMA_08G210500	27.3144	27.0615	27.1407	27.3636	27.4268	27.0755	27.9237	27.2622	27.9091	27.4948	27.8801	27.6386	27.9256	27.6873	28.0129	27.8651	27.5399	28.092	28.0708	27.7752	27.3083	27.6659	27.1047	amine biosynthetic process;amine metabolic process;biosynthetic process;branched chain family amino acid biosynthetic process;branched chain family amino acid metabolic process;carboxylic acid biosynthetic process;carboxylic acid metabolic process;cellular amine metabolic process;cellular amino acid biosynthetic process;cellular amino acid metabolic process;cellular biosynthetic process;cellular …	3-isopropylmalate dehydratase activity;carbon-oxygen lyase activity;catalytic activity;hydro-lyase activity;lyase activity	3-isopropylmalate dehydratase complex;cell part;cytoplasmic part;cytosolic part;intracellular part;macromolecular complex;protein complex	+	3	3	3	22	22	22	26.041	0	190.74	4370100000	54	2.0968	0.0333252
I1J9U1;C6SV78;I1MV28;I1K0S0;K7K4Z1;C6TNK4;C6SXS1;I1J9U0	Ribosomal protein L15	100305473 GLYMA_01G207700	29.1306	29.1437	28.3915	28.9783	29.1726	28.2353	28.4146	28.7937	28.2224	28.7845	28.6255	28.6098	28.7524	28.4563	27.8049	28.0322	27.6889	28.0169	28.2765	28.004	28.1945	28.4452	28.5996	biosynthetic process;cellular biosynthetic process;cellular macromolecule biosynthetic process;cellular macromolecule metabolic process;cellular metabolic process;cellular process;cellular protein metabolic process;macromolecule biosynthetic process;macromolecule metabolic process;metabolic process;primary metabolic process;protein metabolic process;translation	structural constituent of ribosome;structural molecule activity	cell part;cytoplasmic part;intracellular non-membrane-bounded organelle;intracellular organelle;intracellular part;macromolecular complex;non-membrane-bounded organelle;organelle;ribonucleoprotein complex;ribosome	+	8	8	8	33.3	33.3	33.3	21.961	0	94.994	8096400000	94	2.09409	0.0334147
Q6LEG8;C6TIR2	Calmodulin	SCaM-1 100793700 548063 SCaM-3 GLYMA_02G275600 GLYMA_03G004100 GLYMA_05G079700 GLYMA_14G040600 GLYMA_19G068300	29.9324	30.1032	30.3981	30.0034	29.737	29.3032	29.5984	29.6544	29.0828	29.3072	29.3829	29.1561	29.1692	29.1954	28.9172	29.4402	28.5341	29.4195	29.609	29.5112	29.2254	29.3871	29.8841		binding;calcium ion binding;cation binding;ion binding;metal ion binding		+	8	8	1	57.7	57.7	8.7	16.862	0	323.31	16157000000	123	2.09374	0.0334147
I1MM43;I1MM41;K7MFV6;I1MM42	Uncharacterized protein	100789421 GLYMA_16G081200	26.3089	26.3819	26.1053	25.6816	26.0375	25.5669	25.4838	25.6628	25.5796	25.3986				25.2938		25.5353	24.9231	24.9448							catalytic activity;hydrolase activity;hydrolase activity, acting on ester bonds		+	4	4	4	12	12	12	52.048	0	9.5208	745980000	14	2.09289	0.0334147
A0A0R0K9H5	Uncharacterized protein		26.4563	25.9345	25.9734			25.789	25.8179	25.7049	25.7669	25.6081	25.6627	25.468	25.6417	25.6795	25.6018	25.6908		26.0858	26.0671	25.8076	25.5689		25.6215				+	9	2	2	17.3	3.7	3.7	69.787	0	22.053	1183900000	27	2.08901	0.0336444
I1LIK8	Uncharacterized protein	100809292 GLYMA_11G094300	28.9963	28.947	28.8112	28.9098	29.2247	28.8219	28.8547	28.7665	28.896	28.5342	28.5565	28.7518	28.9196	28.673	28.8031	28.6194	28.7187	28.6352	28.3597	28.7553	28.5544	28.5014	28.5493	amine metabolic process;amino acid activation;carboxylic acid metabolic process;cellular amine metabolic process;cellular amino acid metabolic process;cellular ketone metabolic process;cellular macromolecule metabolic process;cellular metabolic process;cellular nitrogen compound metabolic process;cellular process;isoleucyl-tRNA aminoacylation;macromolecule metabolic process;metabolic process;ncRN…	adenyl nucleotide binding;adenyl ribonucleotide binding;aminoacyl-tRNA editing activity;aminoacyl-tRNA ligase activity;ATP binding;binding;carboxylic ester hydrolase activity;catalytic activity;hydrolase activity;hydrolase activity, acting on ester bonds;isoleucine-tRNA ligase activity;ligase activity;ligase activity, forming aminoacyl-tRNA and related compounds;ligase activity, forming carbon-ox…	cell part;cytoplasm;intracellular part	+	26	26	4	24.4	24.4	5.5	134.86	0	178.55	9550500000	157	2.08537	0.0338561
I1M1K5	Uncharacterized protein	100792006 GLYMA_13G221900	25.5294		25.486				25.9275	25.8554	25.6841	26.2121	26.6375	26.1943	26.2557			26.078									carboxypeptidase activity;catalytic activity;exopeptidase activity;hydrolase activity;peptidase activity;peptidase activity, acting on L-amino acid peptides;serine hydrolase activity;serine-type carboxypeptidase activity;serine-type exopeptidase activity;serine-type peptidase activity		+	2	2	2	5.8	5.8	5.8	53.779	0.0006812	3.2285	980160000	6	2.07883	0.0342963
I1N5R6	Uncharacterized protein	100792857 GLYMA_19G008600	30.1132	30.0014	30.4269	30.0908	30.5553	29.9442	30.2586	30.4002	29.8743	29.9407	30.1794	29.9615	29.8173	30.5475	30.0827	30.0452	30.5687	30.9168	30.895	30.4525	29.5876	29.6141	29.5448		binding;catalytic activity;cation binding;ion binding;metal ion binding;oxidoreductase activity;transition metal ion binding;zinc ion binding		+	17	17	17	61.9	61.9	61.9	34.329	0	153.35	28005000000	297	2.07795	0.0342963
I1LJ94;I1LPZ3	V-type proton ATPase subunit a	100783125 GLYMA_11G113400	29.2039	29.1087	29.3384	29.2816	29.0014	29.0082	28.9796	29.2775	28.9947	29.0912	28.6983	28.9552	28.9011	28.7261	28.6627	28.8803	29.0601	28.7474	28.4861	28.6612	28.8871	28.6193	28.8409	ATP hydrolysis coupled proton transport;cation transport;cellular process;energy coupled proton transport, against electrochemical gradient;establishment of localization;hydrogen transport;ion transmembrane transport;ion transport;monovalent inorganic cation transport;proton transport;transmembrane transport;transport	cation transmembrane transporter activity;hydrogen ion transmembrane transporter activity;inorganic cation transmembrane transporter activity;ion transmembrane transporter activity;monovalent inorganic cation transmembrane transporter activity;substrate-specific transmembrane transporter activity;substrate-specific transporter activity;transmembrane transporter activity;transporter activity	cell part;cytoplasmic part;integral to membrane;intracellular organelle part;intracellular part;intrinsic to membrane;macromolecular complex;membrane part;organelle part;protein complex;proton-transporting two-sector ATPase complex, proton-transporting domain;proton-transporting V-type ATPase, V0 domain;vacuolar part;vacuolar proton-transporting V-type ATPase, V0 domain	+	20	20	20	30.9	30.9	30.9	92.973	0	323.31	10679000000	220	2.07468	0.0344843
A0A0R4J2L6	Uncharacterized protein	100778773 GLYMA_01G244900	26.9319	26.3433	26.4957	26.3248	26.5554	26.4502	27.0714	26.3885	26.7863	26.9677	27.0704	27.2862	27.2866	26.9708	26.7695	26.9265		27.1439	27.4149	27.009	26.9912	27.2602	26.9707				+	9	9	9	11.5	11.5	11.5	121.36	0	51.73	2526000000	48	2.06703	0.0349927
I1KYQ5	Glycosyltransferase (EC 2.4.1.-)	100777345 GLYMA_08G338100	28.2517	27.9408	28.1194	28.2624	28.4401	28.1347	28.7599	28.6436	28.5155	27.9619	28.3226	28.1714	28.2407	28.8323	28.6465	28.0372	28.9807	28.4095	28.3299	28.2171	27.9822	27.4868	27.5738		catalytic activity;transferase activity;transferase activity, transferring glycosyl groups;transferase activity, transferring hexosyl groups		+	14	14	9	36.2	36.2	29.9	51.281	0	323.31	6720400000	147	2.06652	0.0349927
A0A0R0KHW0;C6T4K2	40S ribosomal protein S26	GLYMA_04G221400	27.9931	28.0545	26.929	28.6698	27.8234	28.8481	26.7846	27.7917	26.888	27.4028	27.9064	27.5177	27.7876	27.3135	26.5634	26.9576	26.2991	26.9713	27.6988	26.8381	27.4605	27.5185	27.5992	biosynthetic process;cellular biosynthetic process;cellular macromolecule biosynthetic process;cellular macromolecule metabolic process;cellular metabolic process;cellular process;cellular protein metabolic process;macromolecule biosynthetic process;macromolecule metabolic process;metabolic process;primary metabolic process;protein metabolic process;translation	structural constituent of ribosome;structural molecule activity	cell part;cytoplasmic part;intracellular non-membrane-bounded organelle;intracellular organelle;intracellular part;macromolecular complex;non-membrane-bounded organelle;organelle;ribonucleoprotein complex;ribosome	+	6	4	1	38	19.4	7.8	14.812	0	16.047	4288700000	77	2.06544	0.0350078
I1KE79	Uncharacterized protein	100776416 GLYMA_14G054400	26.1902	26.3852	26.2649	26.7158	26.9705	26.5027	27.1087	26.9706	27.2382	26.7029	26.936	27.1996	26.4843	27.062	26.5496	26.3443	27.2182	27.2905	27.108	26.9609	26.5965	26.3056	26.0885		catalytic activity;transferase activity;transferase activity, transferring glycosyl groups;transferase activity, transferring hexosyl groups		+	6	6	6	20.8	20.8	20.8	51.936	0	66.955	2371600000	57	2.05531	0.0357606
I1L913	Uncharacterized protein	100797935 GLYMA_10G059200	25.8913	24.6341	25.1591	26.3053	25.3991	24.8107	26.388	26.951	26.3813	26.4507	27.4219	26.4402	26.9458	27.1363	26.6339	27.3482	26.8429	27.7739	26.5169	26.8624	27.2913	25.8413	27.1341	cellular metabolic process;cellular process;metabolic process;one-carbon metabolic process;small molecule metabolic process	binding;carbonate dehydratase activity;carbon-oxygen lyase activity;catalytic activity;cation binding;hydro-lyase activity;ion binding;lyase activity;metal ion binding;transition metal ion binding;zinc ion binding		+	6	6	6	17.3	17.3	17.3	32.052	0	16.719	2214000000	35	2.05303	0.0358747
I1N4J3	Uncharacterized protein	100806089 GLYMA_18G265900	25.9503	25.6517	25.9861	25.7069	25.6541	25.6682	26.4138	26.8374	26.5226		26.9563	26.5298	26.7447	26.8985	26.3337	26.7003	27.3053	26.7982	25.9038	26.2133	26.6664	25.6909	26.2995		catalytic activity;transferase activity;transferase activity, transferring glycosyl groups;transferase activity, transferring hexosyl groups		+	6	6	6	17.8	17.8	17.8	49.522	0	25.528	1746600000	47	2.04295	0.0365583
I1NCW3	Peroxidase (EC 1.11.1.7)	100792351 GLYMA_20G001400					25.1632					26.1622				25.7975	26.1742	26.4583	26.4022	25.656	25.2769	25.6257	26.2277	26.8873	27.2231	response to chemical stimulus;response to oxidative stress;response to stimulus;response to stress	antioxidant activity;binding;catalytic activity;cation binding;heme binding;ion binding;iron ion binding;metal ion binding;oxidoreductase activity;oxidoreductase activity, acting on peroxide as acceptor;peroxidase activity;tetrapyrrole binding;transition metal ion binding	extracellular region	+	5	4	4	17	14.3	14.3	35.037	0	14.992	925880000	13	2.04326	0.0365583
M1FIU8;C6SZP9	ATPase subunit 8	atp8 GlmaxMp82	26.0033	25.8097	25.7447	26.4972	26.8503	25.7843	26.9522	26.4185	26.4138	25.7138	26.0195	25.7482	26.2923	26.3459	25.9062	25.7197	26.0439	25.8841	25.804		25.7042	25.5346	25.8582		catalytic activity;hydrolase activity;hydrolase activity, acting on acid anhydrides;hydrolase activity, acting on acid anhydrides, catalyzing transmembrane movement of substances;transmembrane transporter activity;transporter activity	cell part;cytoplasmic part;integral to membrane;intracellular membrane-bounded organelle;intracellular organelle;intracellular part;intrinsic to membrane;membrane part;membrane-bounded organelle;mitochondrion;organelle	+	4	4	4	30	30	30	18.319	0	16.511	1552900000	27	2.04216	0.0365583
A0A0R0EST0;I1JRT4;I1NCD8;I1LBR4;C6TNW7;C6TMI1;C6TB76;I1KPF7;I1K6D8;C6TE17;I1LCB5;I1NI31;K7LK88	Serine/threonine-protein phosphatase (EC 3.1.3.16)	100816262 GLYMA_19G248700	26.2872	26.671	26.6101	26.5101	26.8187		26.1783	26.1188	26.1721	26.323	26.0943	25.8841	25.9675	26.2392	25.9158	25.8646		26.0311			26.1927	25.7545	26.1287		catalytic activity;hydrolase activity;hydrolase activity, acting on ester bonds;phosphatase activity;phosphoprotein phosphatase activity;phosphoric ester hydrolase activity		+	4	4	2	14.9	14.9	9	36.512	0	9.493	1520500000	21	2.0378	0.0368523
C6ZS34;C0LUM4;C6T4H8	TIR-NBS-LRR type disease resistance protein	100301898 GLYMA_02G023800	25.2146	25.6343		25.5005	25.9666		25.8919	25.6172	25.6761	25.6406	25.7666	25.5912	25.4544			25.04	25.194	25.915	26.3092	26.3869	26.0538	25.6149	25.4987	biological regulation;cellular process;cellular response to stimulus;regulation of biological process;regulation of cellular process;response to stimulus;signal transduction			+	4	4	4	19.8	19.8	19.8	29.842	0	16.635	1019500000	16	2.03615	0.0369172
I1LZ47;I1L8V8;C6TMB5;C6T5N1;A0A0R0HHB6	Uncharacterized protein	100789561 GLYMA_13G140100	28.297	28.3873	27.4217	28.1805	27.7621	28.4651	27.6913	27.932	27.4133	27.374	27.1128	27.3974	27.7056		27.3781	27.4362	27.2631	27.2768	27.3572	27.4239	27.2958	27.3503		biosynthetic process;cellular biosynthetic process;cellular macromolecule biosynthetic process;cellular macromolecule metabolic process;cellular metabolic process;cellular process;cellular protein metabolic process;macromolecule biosynthetic process;macromolecule metabolic process;metabolic process;primary metabolic process;protein metabolic process;translation	structural constituent of ribosome;structural molecule activity	cell part;cytoplasmic part;intracellular non-membrane-bounded organelle;intracellular organelle;intracellular part;macromolecular complex;non-membrane-bounded organelle;organelle;ribonucleoprotein complex;ribosome	+	4	4	4	38	38	38	17.758	0	12.896	4342900000	49	2.02879	0.0373964
I1MG80	Uncharacterized protein	100778568 GLYMA_15G134300	30.1733	29.9109	30.37	29.6305	29.9632	29.9792	30.1793	30.5195	30.4665	30.9919	30.596	30.154	30.2283	30.5716	30.4766	30.855	31.0576	31.1386	30.5306	30.692	30.2959	30.0882	30.4196		binding;catalytic activity;coenzyme binding;cofactor binding;flavin adenine dinucleotide binding;oxidoreductase activity;oxidoreductase activity, acting on CH-OH group of donors;oxidoreductase activity, acting on the CH-OH group of donors, NAD or NADP as acceptor;UDP-N-acetylmuramate dehydrogenase activity		+	13	13	13	27.5	27.5	27.5	60.35	0	92.987	31493000000	207	2.02897	0.0373964
Q9FQE3;I1LCH6;C6TBG4	Glutathione S-transferase GST 15 (EC 2.5.1.18) (Fragment)		26.7268	26.0169	26.9144	26.6855	26.4749	26.9933	26.6577	27.5135	27.2114	27.0889	27.8357	26.8538	26.9865	27.1991	27.1174	27.261	27.3815	27.8575	27.7827	28.5304	27.309	27.0191	27.7996		catalytic activity;glutathione transferase activity;transferase activity;transferase activity, transferring alkyl or aryl (other than methyl) groups		+	7	7	7	26.2	26.2	26.2	26.141	0	24.787	3321600000	68	2.02576	0.0375824
C6SYA5;C6SZ28	60S ribosomal protein L18a	100306174 GLYMA_15G095400	30.1293	30.1613	29.8739	30.2607	30.0209	30.2494	29.8556	29.7899	29.6277	29.8188	29.956	30.05	29.7976	29.4732	29.897	29.6092	29.2014	29.3192	29.6435	29.7378	29.8298	29.9948	29.9021	biosynthetic process;cellular biosynthetic process;cellular macromolecule biosynthetic process;cellular macromolecule metabolic process;cellular metabolic process;cellular process;cellular protein metabolic process;macromolecule biosynthetic process;macromolecule metabolic process;metabolic process;primary metabolic process;protein metabolic process;translation	structural constituent of ribosome;structural molecule activity	cell part;cytoplasmic part;intracellular non-membrane-bounded organelle;intracellular organelle;intracellular part;macromolecular complex;non-membrane-bounded organelle;organelle;ribonucleoprotein complex;ribosome	+	11	11	1	49.4	49.4	10.1	21.281	0	133.99	19719000000	182	2.02189	0.03769
I1M5D1	PRA1 family protein	100788152 GLYMA_13G351200	28.0584	27.8397	28.2706	27.5219	28.2918	27.907	27.6802	27.8365	27.7611	27.4698	26.957	27.5328	27.1665	27.4424	27.5715	27.5742	27.8827	27.1653	27.7856	27.3646	27.309	27.2928	27.2783				+	3	3	3	31.5	31.5	31.5	20.304	0	42.089	4344000000	94	2.02356	0.03769
I1NDF0;I1NDE9	Uncharacterized protein	100814878 GLYMA_20G021900	26.7378	26.9497		26.046	25.9968	25.6384		25.589			25.5956		25.6798	25.924					25.558		25.2125				binding;cation binding;ion binding;metal ion binding;transition metal ion binding;zinc ion binding		+	3	3	1	10.1	10.1	3.3	40.153	0	21.366	825020000	15	2.0222	0.03769
O04720;C6TMK3;I1M0K3;C6SXU0	Cysteine proteinase inhibitor	547777 GLYMA_15G227500	29.1426	29.0144	29.0533		28.8115					29.5918			29.0951		29.8255			29.4578	29.6275				29.5733		cysteine-type endopeptidase inhibitor activity;endopeptidase inhibitor activity;endopeptidase regulator activity;enzyme inhibitor activity;enzyme regulator activity;peptidase inhibitor activity;peptidase regulator activity		+	2	2	2	9.8	9.8	9.8	27.619	0	63.381	12505000000	11	2.01374	0.0382506
I1K3S5;I1K3S4;I1KS65;F8SMB9	Adenosylhomocysteinase (EC 3.3.1.1)	GLYMA_05G152000	31.5013	31.331	31.5753	31.4384	31.0804	31.2017	31.687	31.4225	31.7818	31.5137	31.4727	31.4147	31.6019	31.5656	31.6404	31.6644	31.505	31.2276	31.358	31.3876	31.4068	31.3871	31.3801	cellular metabolic process;cellular process;establishment of localization;metabolic process;one-carbon metabolic process;small molecule metabolic process;transport	adenosylhomocysteinase activity;catalytic activity;hydrolase activity;hydrolase activity, acting on ether bonds;trialkylsulfonium hydrolase activity	cell part;integral to membrane;intrinsic to membrane;membrane part	+	22	22	15	54.8	54.8	40.2	53.19	0	323.31	61980000000	452	2.01408	0.0382506
I1KH72;I1KH71	Acetyltransferase component of pyruvate dehydrogenase complex (EC 2.3.1.12)	100804938 GLYMA_07G035000	29.7117	29.6794	29.7568	30.0314	29.8164	29.8899	29.7327	29.5402	29.2504	29.5752	29.7335	29.8698	30.2543	29.8685	29.722	29.9467	29.5742	29.9835	30.122	29.8959	30.1911	30.2085	29.8845	carboxylic acid metabolic process;cellular ketone metabolic process;cellular metabolic process;cellular process;metabolic process;monocarboxylic acid metabolic process;organic acid metabolic process;oxoacid metabolic process;pyruvate metabolic process;small molecule metabolic process	acetyltransferase activity;catalytic activity;dihydrolipoamide S-acyltransferase activity;dihydrolipoyllysine-residue acetyltransferase activity;S-acetyltransferase activity;S-acyltransferase activity;transferase activity;transferase activity, transferring acyl groups;transferase activity, transferring acyl groups other than amino-acyl groups	cell part;cytoplasmic part;intracellular organelle lumen;intracellular organelle part;intracellular part;macromolecular complex;membrane-enclosed lumen;mitochondrial matrix;mitochondrial part;organelle lumen;organelle part;protein complex;pyruvate dehydrogenase complex	+	13	13	4	28	28	12.6	59.363	0	160.64	20335000000	139	2.0107	0.0384424
Q01915;Q6I8E6	ATP synthase subunit alpha, mitochondrial	ATPA atp1-1 atp1-2 atp1-3 GlmaxMp39 GlmaxMp55 GlmaxMp78	32.7909	32.6806	32.41	32.8807	32.863	33.1005	32.9536	32.7969	32.9653	33.107	33.0172	33.2047	33.4268	33.0881	33.1073	33.1542	33.1949	33.0641	33.2677	33.0516	33.3251	33.2116	32.7918	ATP biosynthetic process;ATP hydrolysis coupled proton transport;ATP metabolic process;ATP synthesis coupled proton transport;biosynthetic process;cation transport;cellular biosynthetic process;cellular metabolic process;cellular nitrogen compound biosynthetic process;cellular nitrogen compound metabolic process;cellular process;energy coupled proton transport, against electrochemical gradient;en…	active transmembrane transporter activity;adenyl nucleotide binding;adenyl ribonucleotide binding;ATP binding;ATPase activity;ATPase activity, coupled;ATPase activity, coupled to movement of substances;ATPase activity, coupled to transmembrane movement of ions;ATPase activity, coupled to transmembrane movement of substances;binding;catalytic activity;cation transmembrane transporter activity;cati…	cell part;cytoplasmic part;intracellular organelle part;intracellular part;macromolecular complex;membrane;membrane part;mitochondrial inner membrane;mitochondrial membrane;mitochondrial part;organelle inner membrane;organelle membrane;organelle part;protein complex;proton-transporting ATP synthase complex, catalytic core F(1);proton-transporting two-sector ATPase complex, catalytic domain	+	23	23	21	46.9	46.9	44.7	55.33	0	323.31	183360000000	632	2.0038	0.0389799
I1LJ17;I1LPS1;I1LPS0;K7LST9	Uncharacterized protein	100803978 GLYMA_11G107300	27.7407	28.1039	28.0904	27.1768	27.7803	27.4213	27.8719	27.3235	27.2431	27.5839	27.3023	27.1575	27.5128	27.2128	27.1101	27.189	26.8045	26.7144	26.938	27.3262	27.2044	26.5367	27.2072				+	8	8	8	18.6	18.6	18.6	61.719	0	33.111	3802000000	55	1.99823	0.0393262
I1LQR4;G3LTU4	Uncharacterized protein	100816111 GLYMA_12G064000	28.5168	28.4857	28.4749	28.6762	28.8089	28.3742	29.1037	28.8608	28.7276	27.6366	28.5951	28.4848	29.2266	28.6894	28.6492	28.492	28.5695	28.2485	27.9459	27.8673	28.2579	28.183	28.4882		adenyl nucleotide binding;adenyl ribonucleotide binding;ATP binding;binding;nucleotide binding;purine nucleotide binding;purine ribonucleoside triphosphate binding;purine ribonucleotide binding;ribonucleotide binding		+	35	5	2	55.6	8	3.9	71.087	0	38.854	9176100000	115	1.99898	0.0393262
C6TD70;A0A0R0IEK0;I1MQ32;I1MQ30	Uncharacterized protein	100791559 GLYMA_09G148100		25.4887	25.4122			26.1206	26.1407	26.4801	26.0492	26.7268	26.173	26.3857	25.959	26.5051		26.0752		26.0894			26.4685	26.4627	26.3803		binding;catalytic activity;cation binding;ion binding;metal ion binding;oxidoreductase activity;transition metal ion binding;zinc ion binding		+	4	4	4	16.2	16.2	16.2	39.355	0	48.169	1328300000	23	1.99584	0.0394657
I1JGP8	Uncharacterized protein	100787686 GLYMA_02G204000	25.9144	26.0036	26.2728	26.2861	26.3949	26.3218	26.2483	26.4195	26.6433	26.5167	26.2269	26.3228	26.487	26.4679	26.6991	26.6806		26.4951	26.4606		26.5289	26.3945			aminopeptidase activity;binding;catalytic activity;cation binding;exopeptidase activity;hydrolase activity;ion binding;manganese ion binding;metal ion binding;metalloexopeptidase activity;metallopeptidase activity;peptidase activity;peptidase activity, acting on L-amino acid peptides;transition metal ion binding	cell part;cytoplasm;intracellular part	+	18	3	3	41.4	7.5	7.5	59.677	0	15.446	1744200000	45	1.99196	0.0397405
I1L1I7;A0A0R0G058	Uncharacterized protein	100782177 GLYMA_16G162400	30.3546	28.2802	28.6951	28.9316	28.794	28.6254	28.9629	31.085	30.4473	32.125	31.1602	30.7827	29.5484	30.1455	30.4886	30.4121	31.5299	31.5395	30.953	30.5105	30.828	29.35	30.9185		binding;carbon-sulfur lyase activity;catalytic activity;cofactor binding;lyase activity;pyridoxal phosphate binding;vitamin B6 binding;vitamin binding		+	15	15	15	44.2	44.2	44.2	50.028	0	320.23	31438000000	223	1.98978	0.0398624
I1MEB4;I1M290	Uncharacterized protein	100775705 GLYMA_15G068500	28.2932	28.5048	29.1024	28.9196	28.0717	28.8123	27.8941	27.9874	28.2832	27.6831	28.0972	27.877	27.7769	27.6572	28.2025	27.8499	28.1094	27.6599	27.6442	28.2045	27.6432	28.0447	27.6995	biosynthetic process;cellular biosynthetic process;cellular macromolecule biosynthetic process;cellular macromolecule metabolic process;cellular metabolic process;cellular process;cellular protein metabolic process;macromolecule biosynthetic process;macromolecule metabolic process;metabolic process;primary metabolic process;protein metabolic process;translation	structural constituent of ribosome;structural molecule activity	cell part;intracellular organelle part;intracellular part;large ribosomal subunit;macromolecular complex;organelle part;ribonucleoprotein complex	+	7	7	3	34.9	34.9	9.6	16.668	0	22.498	6244200000	104	1.98869	0.0398836
I1LGU8	Uncharacterized protein	100777427 GLYMA_11G038300	26.7986	26.9054	26.1076	26.7345	26.6768	25.918	25.5094	26.4693	26.2131		24.9482	25.2711	25.5279	25.5797		25.5354		25.1964		25.5659	25.5997		24.8628			extracellular region	+	5	4	3	22.7	19.5	14.3	28.17	0	9.8257	1196700000	20	1.98391	0.040246
I1KXM8;I1JBU6;I1J5H1;I1N1B4;I1J5H2;A0A0R0KRC0	Serine/threonine-protein phosphatase (EC 3.1.3.16)	100783950 GLYMA_08G293400	27.2799	27.088	27.0664	27.1562	27.0649	26.8163	27.1706	27.022	27.1273	26.9946	26.6514	27.1185	26.4581	26.9071	26.6182	27.0258	26.718	26.3871	26.6684	26.6634	26.5776	26.8209	26.5756		catalytic activity;hydrolase activity;hydrolase activity, acting on ester bonds;phosphatase activity;phosphoprotein phosphatase activity;phosphoric ester hydrolase activity		+	7	7	6	37.3	37.3	32.7	34.979	0	49.183	2590800000	75	1.97146	0.0413349
I1JSD6;A0A0R0K1M2	Uncharacterized protein	GLYMA_04G003300			24.1914			23.884			23.819			24.6904		24.059		24.2413	23.7337	24.6358	24.4991	24.5768		25.2593	25.0581		catalytic activity;oxidoreductase activity		+	2	2	2	7	7	7	30.467	0	13.716	333180000	18	1.9696	0.0414313
A0A0R0KBX5	Uncharacterized protein	100815931 GLYMA_04G236900	27.1994	27.0251	26.5681	27.0648	26.9362	27.2869	27.4305	27.9475	27.5323	28.2087	28.2918	28.2683	27.379	27.7965	27.9867	27.8782	28.125	27.9988	28.4582	26.9244	27.5274	28.4915	27.8692				+	19	19	5	10.4	10.4	2.7	240.25	0	40.032	4742100000	63	1.96658	0.0416391
C6TEP4;A0A0R0GL47;K7LWV9	Xyloglucan endotransglucosylase/hydrolase (EC 2.4.1.207)		23.3612				23.9129			25.0395		24.3066	25.0373	24.903	25.3109	25.548		25.0853		26.3405		26.2426				carbohydrate metabolic process;cell wall organization;cell wall organization or biogenesis;cellular carbohydrate metabolic process;cellular component organization or biogenesis;cellular glucan metabolic process;cellular macromolecule metabolic process;cellular metabolic process;cellular polysaccharide metabolic process;cellular process;glucan metabolic process;macromolecule metabolic process;meta…	catalytic activity;hydrolase activity;hydrolase activity, acting on glycosyl bonds;hydrolase activity, hydrolyzing O-glycosyl compounds;transferase activity;transferase activity, transferring glycosyl groups;transferase activity, transferring hexosyl groups;xyloglucan:xyloglucosyl transferase activity	apoplast;cell part;cell wall;external encapsulating structure;extracellular region	+	2	2	2	8.1	8.1	8.1	31.722	0	5.7736	648670000	15	1.95809	0.0422956
A0A0R0JSY5	Uncharacterized protein	GLYMA_06G155700	25.133	25.6282	25.4569	25.6049	25.0713		25.7173	25.5683	25.6564	25.792	26.1081	25.5275	26.0002	25.9346	25.9956	26.2805	26.0206	26.1613	26.0621	25.8713	26.1559	25.7293					+	4	4	4	5.5	5.5	5.5	126.22	0	13.947	1169900000	18	1.9582	0.0422956
C6TD30;I1LHU6;C6TLM0;I1LHU8;I1M623	Uncharacterized protein		26.0083		26.9168	26.8521	26.8094	26.5999	27.3799	27.622	27.2037	27.34	27.9271	27.1432	27.1447	26.8865	27.0021	27.0788	26.6123	27.4058	27.52	27.3447	27.05	27.442	27.5632				+	12	8	3	45	32.7	14.8	35.552	0	15.077	3033700000	24	1.95505	0.0425101
C6THD3;I1JF32	Uncharacterized protein (Fragment)		27.5934	27.3853	27.1766	27.2529	27.2534	27.7599	26.5172	27.0261	26.5041	26.7488		26.497	27.0969	26.846	26.4441	26.4701	26.9459	26.7446	26.5313		27.0769	26.2489	26.6551	cellular component assembly;cellular component assembly at cellular level;cellular component organization;cellular component organization at cellular level;cellular component organization or biogenesis;cellular component organization or biogenesis at cellular level;cellular macromolecular complex assembly;cellular macromolecular complex subunit organization;cellular process;chromatin organization…	binding;DNA binding;nucleic acid binding	cell part;chromosomal part;intracellular membrane-bounded organelle;intracellular organelle;intracellular organelle part;intracellular part;macromolecular complex;membrane-bounded organelle;nucleosome;nucleus;organelle;organelle part;protein-DNA complex	+	4	4	4	43.9	43.9	43.9	17.958	0	82.486	2513900000	99	1.94681	0.0432407
I7DM41;I1JL80;C6TAU2;I7CBU6;I1JL81	Ferritin (EC 1.16.3.1)		26.5585	26.9403	27.5629	27.7321	27.2162	27.1391	26.6388	26.7852	26.7166	26.4973	26.7292	26.6193	27.9195	28.2984	26.7951	28.1417	28.5475	27.3394	27.0183	28.1259	27.7303	27.9118	28.2594	biological regulation;cation homeostasis;cation transport;cellular cation homeostasis;cellular chemical homeostasis;cellular homeostasis;cellular ion homeostasis;cellular iron ion homeostasis;cellular metal ion homeostasis;cellular process;chemical homeostasis;establishment of localization;homeostatic process;ion homeostasis;ion transport;iron ion homeostasis;iron ion transport;metal ion homeosta…	binding;catalytic activity;cation binding;ferric iron binding;ferroxidase activity;ion binding;iron ion binding;metal ion binding;oxidoreductase activity;oxidoreductase activity, oxidizing metal ions;oxidoreductase activity, oxidizing metal ions, oxygen as acceptor;transition metal ion binding		+	6	4	3	24.3	15.8	10	29.15	0	10.222	3876000000	49	1.94436	0.0434009
I1KIE4;I1KIE8	Uncharacterized protein	100804943 GLYMA_07G073800				24.165	24.5067		25.0446	25.5897	25.0463	25.9522	25.6157	25.4827	24.7654	24.9852	25.1986	24.8437		25.0503	25.1077	25.7479	24.7286				catalytic activity;oxidoreductase activity		+	4	4	4	20.1	20.1	20.1	32.186	0	35.508	640470000	25	1.94025	0.0437286
O65027;I1K3R3;O63067;I1KS56;K7KQC9	Aspartokinase-homoserine dehydrogenase (Fragment)	AK-HSDH	27.2657	27.2907	27.3875	27.6623	27.0554	27.5863	27.4462	27.8137	27.529	27.7728	27.818	28.0633	27.8585	27.6215	28.0027	28.1396	27.8006	27.5815	27.6741	27.6375	27.7975	27.816	27.4318	amine biosynthetic process;amine metabolic process;aspartate family amino acid biosynthetic process;aspartate family amino acid metabolic process;biosynthetic process;carboxylic acid biosynthetic process;carboxylic acid metabolic process;cellular amine metabolic process;cellular amino acid biosynthetic process;cellular amino acid metabolic process;cellular biosynthetic process;cellular ketone met…	amine binding;amino acid binding;amino acid kinase activity;aspartate kinase activity;binding;carboxylic acid binding;catalytic activity;coenzyme binding;cofactor binding;homoserine dehydrogenase activity;kinase activity;NADP binding;nucleotide binding;oxidoreductase activity;oxidoreductase activity, acting on CH-OH group of donors;oxidoreductase activity, acting on the CH-OH group of donors, NAD…	cell part;chloroplast;cytoplasmic part;intracellular membrane-bounded organelle;intracellular organelle;intracellular part;membrane-bounded organelle;organelle;plastid	+	13	13	13	13.4	13.4	13.4	99.723	0	97.46	4358800000	92	1.93831	0.0438404
I1JMY1	Uncharacterized protein	100806458 GLYMA_03G120000	28.591	28.5844	28.5402	28.5276	28.3833	28.5765	28.5332	28.7397	28.6336	28.7379	28.5433	28.5823	28.7632	28.7651	28.7902	29.0241	29.0419	28.7653	28.6766	28.7238	28.7435	28.5393	29.0194	alcohol metabolic process;arabinose metabolic process;carbohydrate metabolic process;cellular carbohydrate metabolic process;cellular metabolic process;cellular process;L-arabinose metabolic process;metabolic process;monosaccharide metabolic process;pentose metabolic process;primary metabolic process;small molecule metabolic process	alpha-N-arabinofuranosidase activity;catalytic activity;hydrolase activity;hydrolase activity, acting on glycosyl bonds;hydrolase activity, hydrolyzing O-glycosyl compounds		+	13	13	3	21.3	21.3	4.3	73.89	0	66.375	8677300000	150	1.92982	0.0446193
K7MNZ5;Q96454;I1MC68	Uncharacterized protein	547893 GLYMA_17G254900	25.9492	25.3979	25.1624	25.334	26.3712	25.0761	25.8655	25.514	25.1337	25.7495	26.239	24.986	26.2559	25.7945	26.8916	26.3082	26.5057	26.7778	26.9866	26.6679	26.1063	25.7187	25.501		catalytic activity;cysteine-type peptidase activity;hydrolase activity;peptidase activity;peptidase activity, acting on L-amino acid peptides		+	4	4	4	16.8	16.8	16.8	40.381	0	126.29	1581400000	59	1.92362	0.0451738
P28551;I1MG61;I1L0G9;I1K2Y0;I1KRC0	Tubulin beta chain (Beta-tubulin) (Fragment)	TUBB	32.0838	32.1741	31.4851	31.9005	31.7808	31.8549	31.7871	31.431	31.2431	31.4184	31.2223	31.4086	31.3237	31.5789	31.4728	31.2252	30.5259	31.2022	31.366	31.2533	31.1476	31.3115	30.9058	cellular component assembly;cellular component assembly at cellular level;cellular component organization;cellular component organization at cellular level;cellular component organization or biogenesis;cellular component organization or biogenesis at cellular level;cellular macromolecular complex assembly;cellular macromolecular complex subunit organization;cellular process;cellular protein compl…	binding;catalytic activity;GTP binding;GTPase activity;guanyl nucleotide binding;guanyl ribonucleotide binding;hydrolase activity;hydrolase activity, acting on acid anhydrides;hydrolase activity, acting on acid anhydrides, in phosphorus-containing anhydrides;nucleoside-triphosphatase activity;nucleotide binding;purine nucleotide binding;purine ribonucleoside triphosphate binding;purine ribonucleo…	cell part;cytoplasm;cytoskeletal part;intracellular organelle part;intracellular part;macromolecular complex;microtubule;organelle part;protein complex	+	21	21	2	69.9	69.9	6.6	45.751	0	323.31	69357000000	536	1.91523	0.0459675
I1LZ35;I1L8U0	Uncharacterized protein	100786529 GLYMA_13G138900	25.9075	25.9151	25.1889	25.4078	25.7785	25.4414	24.8832	25.5007	24.9842	25.2025	25.0192	25.2258	25.1891	24.7669	24.7644	24.9879	25.0779	25.0423	25.0158	24.8776	25.0659	25.0982	24.945	cellular component organization;cellular component organization or biogenesis;establishment of localization;establishment of localization in cell;establishment of protein localization;intracellular protein transport;intracellular transport;membrane fusion;membrane organization;protein transport;transport		cell part;membrane	+	3	3	3	12.8	12.8	12.8	29.777	0	5.9391	810160000	25	1.91372	0.0460391
I1NFW0;I1LEK6	Uncharacterized protein	100800277 GLYMA_20G126900	26.7424	26.5332	26.4142	26.6822	26.6891	26.7004	26.8921	26.8293	26.6235	27.1015	27.4157	26.7297	26.7637	27.1775	26.5901	26.9526	26.7239	27.0687	27.1964	26.9347	27.2323	27.3644	27.0335	amine catabolic process;amine metabolic process;aromatic amino acid family catabolic process;aromatic amino acid family metabolic process;aromatic compound catabolic process;carboxylic acid catabolic process;carboxylic acid metabolic process;catabolic process;cellular amine metabolic process;cellular amino acid catabolic process;cellular amino acid metabolic process;cellular aromatic compound met…	arylformamidase activity;catalytic activity;hydrolase activity;hydrolase activity, acting on carbon-nitrogen (but not peptide) bonds;hydrolase activity, acting on carbon-nitrogen (but not peptide) bonds, in linear amides		+	6	6	5	22.8	22.8	19.6	30.578	0	11.716	2640400000	62	1.90854	0.0465024
I1JPX8;C6T4L8	Fructose-bisphosphate aldolase (EC 4.1.2.13)	100527532 GLYMA_03G191500	29.1385	28.6804	29.3035	29.3845	28.8345	28.2157	29.5594	29.3682	29.5309	29.8658	29.6804	29.3864	29.6343	29.6584	29.783	29.6345	29.6516	29.7801	29.4893	29.4055	29.502	29.6248	29.3895	alcohol catabolic process;alcohol metabolic process;carbohydrate catabolic process;carbohydrate metabolic process;catabolic process;cellular carbohydrate catabolic process;cellular carbohydrate metabolic process;cellular metabolic process;cellular process;generation of precursor metabolites and energy;glucose catabolic process;glucose metabolic process;glycolysis;hexose catabolic process;hexose m…	aldehyde-lyase activity;carbon-carbon lyase activity;catalytic activity;fructose-bisphosphate aldolase activity;lyase activity		+	17	11	11	48	32.4	32.4	38.51	0	188.65	15595000000	120	1.90266	0.0470461
I1LNP0;I1LNP1	Uncharacterized protein	100794623 GLYMA_12G001800	32.4264	32.2476	32.6252	32.1617	32.2717	32.5994	31.7742	32.7084	31.9077	31.4975	31.953	31.3642	31.4158	31.8405	30.8259	31.8061	31.4731	31.6529	31.0123	31.5286	31.385	30.2195	31.6199	establishment of localization;transport		cell part;integral to membrane;intrinsic to membrane;membrane part	+	70	70	55	76.6	76.6	66	69.56	0	323.31	85402000000	853	1.9017	0.047061
I1MRC4;A0A0R0JEA2	Uncharacterized protein	100788041 GLYMA_17G021400	25.7364	25.8364	26.0619	26.9138	26.7854	26.4069	26.3246	26.1222	26.134	26.7717	26.8898	26.9365	26.7512	26.8513	26.3884	27.1693	26.4981	26.9397	26.6769	26.445	26.0477	26.6717	27.1083				+	8	8	8	10.6	10.6	10.6	97.195	0	29.818	2179600000	26	1.89573	0.0476222
A0A0R0F1H5;I1N2I4;A0A0R0JAM3;C6THR8	Uncharacterized protein	100776864 GLYMA_18G182600	28.1166	27.5946	27.8466	27.494	27.2638	27.6884	26.4906	26.9836	27.1795	27.2531	26.8995	26.9348	26.8605	27.4786	27.1547		27.1263	26.8091	27.2844	27.0855	27.0073						+	5	5	5	26.6	26.6	26.6	24.206	0	15.328	2968300000	28	1.89443	0.0476746
I1LHD6;A0A0R0HMK4;I1LHD7	Uncharacterized protein	100798507 GLYMA_11G054900	28.0771	27.801	28.2069	28.1987	28.0919	27.8815	28.2395	28.4755	28.0753	28.8521	29.0346	28.6748	28.7138	28.5006	28.5571	28.9048	28.6842	29.0052	28.5431	27.9572	28.4972	28.2523	28.6923	lipid metabolic process;metabolic process;primary metabolic process	catalytic activity;hydrolase activity;hydrolase activity, acting on ester bonds;phosphoric diester hydrolase activity;phosphoric ester hydrolase activity		+	8	8	5	29.8	29.8	16.5	45.857	0	172.11	8132700000	124	1.89241	0.0477814
I1JT95;C6TJ35;A0A0R0K8J0	Uncharacterized protein	100777972 GLYMA_04G030800	26.3529	26.0666	26.2827	26.6655	26.616	26.6919	26.6096	26.3408	26.7594	26.5875	26.5522	26.3049	26.312	26.9668	26.9218	26.7149	26.997	27.1072		26.9277		26.8424					+	9	4	3	45.7	24.6	21.7	29.992	0	10.109	2096800000	35	1.89181	0.0477814
I1L8Q0;A0A0R0I0I4	Lambda class glutathione S-transferase	100817305 GSTL3 GLYMA_10G047700	26.5696	25.3218	26.121	26.8697	26.3144	26.2502	27.2386	26.5022	26.9307	26.6565	27.467	26.5384	27.0603	27.1834	27.1976	27.611	26.9627	27.6583	27.6223	26.9441	27.0513	27.5337	27.1284		catalytic activity;transferase activity		+	5	5	1	33.3	33.3	11.8	27.089	0	29.447	2773300000	37	1.88942	0.047955
I1KRC8	Histidinol dehydrogenase, chloroplastic (HDH) (EC 1.1.1.23)	100802665 GLYMA_08G081500			25.5527				25.6101	25.3993	25.5253	26.0441				25.7053		25.7076	25.6708	25.8896	25.7079	25.6948		25.9612	25.8853	amine biosynthetic process;amine metabolic process;biosynthetic process;carboxylic acid biosynthetic process;carboxylic acid metabolic process;cellular amine metabolic process;cellular amino acid biosynthetic process;cellular amino acid metabolic process;cellular biosynthetic process;cellular ketone metabolic process;cellular metabolic process;cellular nitrogen compound biosynthetic process;cellu…	binding;catalytic activity;cation binding;coenzyme binding;cofactor binding;histidinol dehydrogenase activity;ion binding;metal ion binding;NAD binding;nucleotide binding;oxidoreductase activity;oxidoreductase activity, acting on CH-OH group of donors;oxidoreductase activity, acting on the CH-OH group of donors, NAD or NADP as acceptor;transition metal ion binding;zinc ion binding	cell part;chloroplast;cytoplasmic part;intracellular membrane-bounded organelle;intracellular organelle;intracellular part;membrane-bounded organelle;organelle;plastid	+	2	2	2	3.9	3.9	3.9	47.324	0	3.6658	814210000	5	1.88778	0.0480454
C6SWA5	40S ribosomal protein S26	100305706 GLYMA_14G208600	29.7598	29.874	28.7328	29.7488	29.6484	29.8527	28.9583	29.4803	28.5582	29.2867	29.5068	29.8138	29.3235	28.7876	28.4559	28.7317	28.3581	28.9114	29.3381	29.0032	29.3676	29.259	29.4348	biosynthetic process;cellular biosynthetic process;cellular macromolecule biosynthetic process;cellular macromolecule metabolic process;cellular metabolic process;cellular process;cellular protein metabolic process;macromolecule biosynthetic process;macromolecule metabolic process;metabolic process;primary metabolic process;protein metabolic process;translation	structural constituent of ribosome;structural molecule activity	cell part;cytoplasmic part;intracellular non-membrane-bounded organelle;intracellular organelle;intracellular part;macromolecular complex;non-membrane-bounded organelle;organelle;ribonucleoprotein complex;ribosome	+	7	7	5	38.5	38.5	20	14.943	0	171.06	14199000000	161	1.88367	0.0484044
I1KQ42;A0A0R0IGM1;K7L4V0;K7L4U9	Uncharacterized protein	100813160 GLYMA_08G040000	28.0279	27.9905	27.8761	27.9289	27.6075	28.0353	28.0146	28.1662	28.1551	28.0053	28.279	27.8539	28.3516	28.1022	28.2379	28.3912	28.4321	28.4567	28.1831	28.537	28.0586	28.3684	28.1334		catalytic activity		+	9	9	2	24	24	7.8	44.577	0	58.922	6025900000	49	1.88292	0.0484044
A0A0R4J610	Uncharacterized protein	100789360 GLYMA_20G026300	27.2383	27.4084	27.7133	27.2095	27.2593	27.2639	26.4211	26.8082	27.4576	26.4708	26.2913	26.2859	26.2231	26.5976	26.6881	25.9618	26.8769	26.7977		26.0622							+	6	6	6	15.5	15.5	15.5	57.154	0	11.087	2197200000	19	1.8764	0.0490453
A0A0R0I5R9	Uncharacterized protein	100808736 GLYMA_10G172700				25.5748	25.8736	25.6496	26.2442	26.6169	26.7521	27.1676	26.7982	26.5749	26.5453	26.7336	27.1042	26.6255	26.2852	26.7369	26.1879	26.1597	26.1789	26.7434			binding;catalytic activity;cofactor binding;pyridoxal phosphate binding;vitamin B6 binding;vitamin binding		+	6	6	6	16.3	16.3	16.3	48.069	0	17.982	1679300000	24	1.86882	0.0498152
A0A0R4J3L4	Uncharacterized protein	100817735 GLYMA_06G255200	29.1126	29.7414	28.5886	28.9566	29.4368	29.2578	28.4885	28.472	28.1279	27.9841	28.9283	28.0377	29.1091	28.3592	27.0765	27.871	27.3496	28.9829	27.7024	27.6229	28.8522	27.8455	27.6541	response to stimulus;response to stress			+	8	8	3	41.6	41.6	21.6	27.465	0	64.638	8283100000	63	1.86664	0.0499673
I1LUY8;I1M3B1;C6TLE0;C6THW8	Uncharacterized protein	547601 GLYMA_12G222400	27.0046	26.6342			26.7037	26.6873	26.4175	27.0245	26.6976	27.1073	26.7296	27.0908	26.312	26.3079	26.3926	26.3994		27.2163	26.7859	27.0188	26.8827	27.5243	27.264				+	5	5	5	33.2	33.2	33.2	21.882	0	12.31	2297300000	44	1.86588	0.0499673
I1KXB7	Uncharacterized protein	100800526 GLYMA_08G283100	26.6688	27.0197	26.3724	26.4371	26.7178	26.5896	26.751	27.465	27.2971	27.1807	27.1111	26.7804	26.515	26.4631	27.2269	26.9992	27.1611	26.614	26.7969	26.8218	26.8364	26.6415	26.4737		catalytic activity;transferase activity;transferase activity, transferring glycosyl groups			8	8	8	16.5	16.5	16.5	64.08	0	21.729	2540600000	71	1.86421	0.050067
I1NJ59;C6SXS9	DHAR class glutathione S-transferase	100306061 DHAR4 GLYMA_20G240300	26.1745	26.1892				25.1508	25.485	25.1015	25.4155	24.6204	24.6367		24.6993		25.2666	24.3927							25.0102		catalytic activity;transferase activity			2	2	1	12.7	12.7	4.7	23.472	0	5.1018	519790000	13	1.85608	0.0509182
I1KUF1;A0A0R0INP0;A0A0R0G7D8	Uncharacterized protein	100792948 GLYMA_08G180900	26.4016	26.3592	26.494	25.3724	25.5733	25.7335	24.9416	25.4966	25.785	25.568	24.8019	24.4527	24.58		25.7589	25.0277							24.3661	carbohydrate metabolic process;metabolic process;primary metabolic process	beta-glucosidase activity;catalytic activity;glucosidase activity;hydrolase activity;hydrolase activity, acting on glycosyl bonds;hydrolase activity, hydrolyzing O-glycosyl compounds			4	4	4	6.1	6.1	6.1	83.876	0	9.2379	810940000	25	1.855	0.0509506
I1NHC6;I1LD52	Uncharacterized protein	100803655 GLYMA_20G177200	27.3889	27.3605	26.6077	26.6106	26.5646	26.9711	26.4878	26.9718	26.2905	26.7424	26.7468	26.5491	26.2672	26.3646	26.157	26.3355	25.3222	26.1983	26.4196	26.2582	26.3953	26.6446	26.3643		catalytic activity;glycopeptide alpha-N-acetylgalactosaminidase activity;hydrolase activity;hydrolase activity, acting on glycosyl bonds;hydrolase activity, hydrolyzing O-glycosyl compounds			11	11	11	27	27	27	63.244	0	22.238	2086300000	61	1.85335	0.05105
I1JCL2;C6TNC5	Uncharacterized protein	100818894 GLYMA_02G052300	24.9448	25.0495		24.7069	24.9813	24.8708	25.622	25.6681	25.1449	25.2607	25.5672	25.203	25.2432	25.3054		25.4202	25.3313	25.4501	25.4266	25.3431	25.024	25.3004	25.4906		catalytic activity			2	2	2	8.3	8.3	8.3	37.001	0	6.4127	793550000	5	1.83541	0.0531055
I1KNF5;C6TNC4	Aminomethyltransferase (EC 2.1.2.10) (Glycine cleavage system T protein)	100778188 GLYMA_07G262100	27.7439	27.7421	27.4171	27.8617	27.5575	27.5551	27.5154	27.4683	27.3671	27.2179	27.2457	27.3245	27.8542	27.4862	27.3639	27.6324		27.3109	27.2199	27.0478	27.773			amine catabolic process;amine metabolic process;carboxylic acid catabolic process;carboxylic acid metabolic process;catabolic process;cellular amine metabolic process;cellular amino acid catabolic process;cellular amino acid metabolic process;cellular catabolic process;cellular ketone metabolic process;cellular metabolic process;cellular nitrogen compound metabolic process;cellular process;glycin…	aminomethyltransferase activity;catalytic activity;methyltransferase activity;transaminase activity;transferase activity;transferase activity, transferring nitrogenous groups;transferase activity, transferring one-carbon groups			8	8	2	30.7	30.7	8.8	44.336	0	22.592	3708800000	37	1.83161	0.0534466
I1LDC1;I1LDC2	Uncharacterized protein	100798469 GLYMA_10G220800	29.466	29.4242	29.065	28.9531	28.6706	28.5166	28.7494	28.6743	28.5424	28.7689	28.6528	28.8503	28.2635	28.51	28.995	28.6017	28.0126	28.4302	28.8155	28.5189	28.5831	28.7074	28.5773	establishment of localization;establishment of localization in cell;intracellular transport;transport				7	7	1	35.3	35.3	7.3	24.202	0	126.16	9194300000	98	1.83103	0.0534466
I1J4I1;I1J4I2	Phosphotransferase (EC 2.7.1.-)	100796995 GLYMA_01G007200	25.8817	26.1535	25.9391	26.3166	26.2369	26.0619	26.5488	26.6763	26.5961	27.0299	26.7892	26.854	26.5155	26.888	26.6016	26.9257	25.7807	26.4265	26.733	26.5356	26.507	26.6637	26.8135	alcohol catabolic process;alcohol metabolic process;carbohydrate catabolic process;carbohydrate metabolic process;catabolic process;cellular carbohydrate catabolic process;cellular carbohydrate metabolic process;cellular metabolic process;cellular process;generation of precursor metabolites and energy;glucose catabolic process;glucose metabolic process;glycolysis;hexose catabolic process;hexose m…	adenyl nucleotide binding;adenyl ribonucleotide binding;ATP binding;binding;carbohydrate kinase activity;catalytic activity;hexokinase activity;kinase activity;nucleotide binding;phosphotransferase activity, alcohol group as acceptor;purine nucleotide binding;purine ribonucleoside triphosphate binding;purine ribonucleotide binding;ribonucleotide binding;transferase activity;transferase activity, …			9	9	2	25.4	25.4	6.9	53.649	0	35.297	2009500000	57	1.82897	0.0535613
I1N627;G8FVT3	Uncharacterized protein	100779369 GLYMA_19G020000	31.4385	31.4004	31.2744	31.0088	31.2739	31.8577	30.5802	31.4097	31.2882	30.886	30.8133	30.5783	30.1282	30.4473	30.48	30.3246	31.0026	30.8903	30.955	30.9363	30.9116	30.3166	31.0768			cell part;membrane		15	15	4	49	49	14.7	31.549	0	73.357	42797000000	243	1.82851	0.0535613
I1LN34	Uncharacterized protein	100788278 GLYMA_11G254300	28.6015	28.0333	28.49	28.3046	28.2166	28.0728	28.7845	28.5462	28.8615	29.1317	28.6228	28.4787	28.3661	28.6256	28.752	28.7346	29.0062	28.3484	28.2348	28.1707	28.3901	27.8511	28.4174		binding;selenium binding			15	15	5	42.5	42.5	16.5	53.141	0	237.56	8241100000	139	1.82602	0.0537704
A0A0R4J5A5;C6TGW2;A0A0R0GRY6;A0A0R0L4C1	Uncharacterized protein	100794129 GLYMA_14G176900	29.9527	30.0056	30.4114	29.8859	29.5074	29.6827	29.5051	29.6095	29.7118	29.3711	29.7204	29.3301	29.4133	29.3543	29.3908	29.5414	29.5455	29.3599	29.6955	30.0132	29.6497	29.6224	29.8574					17	17	8	64.8	64.8	33.3	29.282	0	323.31	19352000000	221	1.82042	0.0543693
A0A0R0FLG8;A0A0R0FLH6	Alpha-mannosidase (EC 3.2.1.-)	GLYMA_16G048100	29.4871	29.4501	29.3444	29.2883	29.3368	29.2925	28.8469	29.2041	29.0934	29.1204	28.9671	28.68	28.7165	29.0259	28.8274	29.1772	29.3193	28.9608	28.5659	29.0312	29.0073	28.6029	28.9086					14	13	10	18.3	16.8	14	115.02	0	121.67	11797000000	111	1.81731	0.0546611
I1M5P5;I1M5P8;I1M5P7;I1M5P9	Uncharacterized protein	100777295 GLYMA_13G361900	26.0131	25.8211	25.5846	26.0098	26.8809	27.7788	26.9584	27.0832	27.0499	26.9397	26.7303	26.6454	27.0072	26.3035	27.0303	27.1147	26.1668	27.303	27.5494	28.8304	27.6939	26.8733	27.3218		adenyl nucleotide binding;adenyl ribonucleotide binding;ATP binding;ATPase activity;binding;catalytic activity;hydrolase activity;hydrolase activity, acting on acid anhydrides;hydrolase activity, acting on acid anhydrides, in phosphorus-containing anhydrides;nucleoside-triphosphatase activity;nucleotide binding;purine nucleotide binding;purine ribonucleoside triphosphate binding;purine ribonucleo…	cell part;membrane		37	10	9	27	6.8	6.1	160.94	0	49.522	3000800000	62	1.81206	0.0552256
I1K6M2;B6ZHC1	Uncharacterized protein	100301882 GLYMA_05G204800	24.7667	25.1422	25.1166		26.1314		26.004	24.966	25.7899	26.1808	26.1199	24.9539	26.5785	26.6407	26.1386	25.7769	25.0966	26.2728	26.9419	26.6404	26.5799	25.7946	27.277					6	5	3	38.3	33.8	21.2	23.813	0	201.78	1372200000	48	1.80612	0.0557825
K7MP24;I1MY38	Uncharacterized protein	100819942 GLYMA_17G258700	26.2703	26.3566	26.7579	27.307	26.5956	26.6587	26.8213	26.4259	26.6871	25.9014	26.7394	26.8915	27.2128	27.0235	25.647	26.2818	25.6244	26.3873	26.4123	26.4167	26.7358	26.4219	26.6395	cellular macromolecule metabolic process;cellular metabolic process;cellular process;cellular protein metabolic process;macromolecule metabolic process;metabolic process;primary metabolic process;protein folding;protein metabolic process;response to stimulus;response to stress	adenyl nucleotide binding;adenyl ribonucleotide binding;ATP binding;binding;nucleotide binding;purine nucleotide binding;purine ribonucleoside triphosphate binding;purine ribonucleotide binding;ribonucleotide binding			32	3	3	42.2	2.7	2.7	93.163	0	8.1679	2029300000	41	1.80633	0.0557825
I1JKS9	Uncharacterized protein	100799179 GLYMA_03G030500	28.1497	28.7632	28.9012	28.7011	28.5755	27.5856	27.3895	27.8724	27.9036	27.8474	27.8105	28.0794	27.8578	27.4904	27.6626	27.3324		29.08	28.3205	28.3514	28.1992	28.6116	28.6589	carbohydrate metabolic process;metabolic process;primary metabolic process	catalytic activity;hydrolase activity;hydrolase activity, acting on glycosyl bonds;hydrolase activity, hydrolyzing O-glycosyl compounds			3	3	3	14.3	14.3	14.3	31.688	0	70.128	6162700000	62	1.79914	0.056584
I1JHK1	Peroxidase (EC 1.11.1.7)	100811396 GLYMA_02G234000	26.5362	27.682	26.9722	27.7432	27.5313	26.9828	26.3331	25.8932	26.6823	26.856	25.7776	26.3209	26.3566	26.3819	26.9634	26.3998		26.111		26.6897	25.3862		25.7745	response to chemical stimulus;response to oxidative stress;response to stimulus;response to stress	antioxidant activity;binding;catalytic activity;cation binding;heme binding;ion binding;iron ion binding;metal ion binding;oxidoreductase activity;oxidoreductase activity, acting on peroxide as acceptor;peroxidase activity;tetrapyrrole binding;transition metal ion binding	extracellular region		3	3	0	9.6	9.6	0	35.569	0	11.218	2391800000	22	1.79412	0.0571396
I1MTU1;C6TGD9	Malate dehydrogenase (EC 1.1.1.37)	100814078 GLYMA_17G100600	28.5916	28.5441	28.8665	28.8434	28.6035	28.7586	29.063	28.822	29.1352	28.9177	28.9507	29.1569	29.0566	29.3611	28.8996	29.2012	29.3424	28.9992	29.086	29.0001	28.9259	28.9916	29.2872	acetyl-CoA catabolic process;acetyl-CoA metabolic process;carbohydrate metabolic process;carboxylic acid metabolic process;catabolic process;cellular catabolic process;cellular ketone metabolic process;cellular metabolic process;cellular process;coenzyme catabolic process;coenzyme metabolic process;cofactor catabolic process;cofactor metabolic process;dicarboxylic acid metabolic process;malate me…	catalytic activity;L-malate dehydrogenase activity;malate dehydrogenase activity;oxidoreductase activity;oxidoreductase activity, acting on CH-OH group of donors;oxidoreductase activity, acting on the CH-OH group of donors, NAD or NADP as acceptor			11	10	4	35.5	32.4	17.2	38.294	0	72.648	11106000000	154	1.78932	0.0576697
C6ZHS4;I1KCW5;I1JWR4;C6SXH6	Eukaryotic translation initiation factor 5A (eIF-5A)	100499632 100305991 GLYMA_04G165500 GLYMA_05G024200 GLYMA_06G197300 GLYMA_17G103100	28.9874	29.6592	29.2232	29.2109	29.6224	29.8961	28.8701	28.5941	29.0741	29.0504	29.4988	29.4264	29.7113	29.2859	29.3362	29.2648	28.8108	29.738	29.73	29.7505	29.4565	29.6394	29.5131	biological regulation;positive regulation of biological process;positive regulation of biosynthetic process;positive regulation of cellular biosynthetic process;positive regulation of cellular component organization;positive regulation of cellular metabolic process;positive regulation of cellular process;positive regulation of cellular protein metabolic process;positive regulation of macromolecul…	binding;nucleic acid binding;ribonucleoprotein binding;ribosome binding;RNA binding;translation elongation factor activity;translation factor activity, nucleic acid binding;translation initiation factor activity			9	9	3	47.5	47.5	17.5	17.47	0	86.257	14178000000	165	1.78115	0.0586601
I1M6K6	Uncharacterized protein	100792750 GLYMA_14G017100	29.2714	29.399	28.9909	29.0414	29.5121	29.2405	28.8319	28.5969	28.861	29.3343	28.5275	28.8208	28.5812	28.7062	29.258	28.5523	28.969	28.8634	28.6428	28.6261	28.5428	28.3827	28.5223	alcohol metabolic process;alditol metabolic process;carbohydrate metabolic process;cellular carbohydrate metabolic process;cellular metabolic process;cellular process;glycerol metabolic process;lipid metabolic process;metabolic process;polyol metabolic process;primary metabolic process;small molecule metabolic process	catalytic activity;glycerophosphodiester phosphodiesterase activity;hydrolase activity;hydrolase activity, acting on ester bonds;phosphoric diester hydrolase activity;phosphoric ester hydrolase activity			13	7	7	23.6	14.3	14.3	81.744	0	192.76	10248000000	136	1.77895	0.0588516
I1K5H2;K7KRH2	26S proteasome non-ATPase regulatory subunit 1 homolog	100790425 GLYMA_05G241500	29.1488	28.9109	28.5462	28.5457	28.3556	28.9276	28.3454	28.5805	27.9707	28.5692	28.341	28.4773	28.4986	28.5118	28.155	28.4532	28.2301	28.0238	28.1849	28.2275	28.2527	28.1551	28.3784	biological regulation;regulation of biological process;regulation of catabolic process;regulation of macromolecule metabolic process;regulation of metabolic process;regulation of primary metabolic process;regulation of protein catabolic process;regulation of protein metabolic process	enzyme regulator activity	cell part;intracellular part;macromolecular complex;proteasome complex;protein complex		16	16	3	23.4	23.4	4.8	109.47	0	175.22	7785400000	124	1.77605	0.0591412
I1LLS2;I1LLS1;C6TL53;A0A0R4J4L1;B0LVF3;A0A0R0F859	Uncharacterized protein	100806281 GLYMA_11G164700	27.7033	27.34		27.0717	26.7777		26.9604	26.4299	27.1615	25.987	26.0766		25.9086			25.5091									binding;catalytic activity;coenzyme binding;cofactor binding			5	5	5	21.2	21.2	21.2	28.232	0	18.131	1549900000	20	1.77114	0.0597056
Q43463;A0A0R4J4C5;A0A0R0ENT1;C6TMF1;C6T714;C6SW30;I1LDB3	Ras-related protein Rab7		25.7873	26.0824	25.7329	25.2478	25.6467	25.2349	25.1416	25.3767	25.3072	25.1633						25.2162				25.0609				biological regulation;cellular process;cellular response to stimulus;establishment of localization;establishment of protein localization;intracellular signal transduction;protein transport;regulation of biological process;regulation of cellular process;response to stimulus;signal transduction;small GTPase mediated signal transduction;transport	binding;GTP binding;guanyl nucleotide binding;guanyl ribonucleotide binding;nucleotide binding;purine nucleotide binding;purine ribonucleoside triphosphate binding;purine ribonucleotide binding;ribonucleotide binding	cell part;membrane;plasma membrane		5	3	3	34	24.8	24.8	23.11	0	14.964	561820000	11	1.76452	0.0604081
I1MQ52	Uncharacterized protein	100779813 GLYMA_16G200900	27.8826	26.81	27.6024	27.4152	27.1917	26.6935	27.7594	28.2047	28.0084	28.6049	28.3221	28.1069	27.606	27.9777	27.3917	28.3075	27.8244	27.97	27.6484	27.7253	27.8593	27.6897	27.7836		catalytic activity;hydrolase activity			9	9	9	29.6	29.6	29.6	35.228	0	60.084	5142600000	120	1.76492	0.0604081
A0A0R0KHF0;I1JMQ1;C6T654	Uncharacterized protein	100789844 GLYMA_03G109900	32.3724	32.5397	32.6242	32.2611	32.7781	32.5699	32.4299	32.3183	32.2089	32.0321	32.1102	31.6528	32.2357	32.4053	33.1444	32.637	32.6527	32.1467	31.8811	32.1827	32.3559	31.3622	32.2566		electron carrier activity			8	8	7	36.4	36.4	28.3	19.17	0	298.46	120920000000	273	1.76029	0.0608908
A0A0R0I9G1	Uncharacterized protein	100780375 GLYMA_09G167100	27.2601	27.3281	27.4613	27.288	27.2192	27.7234	26.9974	26.8644	27.3715	26.5676	26.8422	27.0724	26.8724	26.5069	26.9353	26.8942	26.7709	26.9249	27.024	27.3401	27.2712	27.4802	26.9704					8	8	3	8.2	8.2	3.1	116.89	0	16.938	3018100000	52	1.75951	0.0608911
Q42794;C6TNL0;A0A0R0FQN0;Q41199	Aspartate aminotransferase (EC 2.6.1.1)		28.2981	28.1464	28.1961	28.2584	27.9017	27.7889	28.4935	28.438	28.5547	28.7913	28.3615	28.6965	28.2862	28.4752	28.6319	28.6048	28.5182	28.4338	28.4906	27.8734	28.2969	28.7576	28.6735	amine metabolic process;biosynthetic process;carboxylic acid metabolic process;cellular amine metabolic process;cellular amino acid metabolic process;cellular ketone metabolic process;cellular metabolic process;cellular nitrogen compound metabolic process;cellular process;metabolic process;nitrogen compound metabolic process;organic acid metabolic process;oxoacid metabolic process;primary metabol…	binding;catalytic activity;cofactor binding;L-aspartate:2-oxoglutarate aminotransferase activity;L-phenylalanine aminotransferase activity;L-phenylalanine:2-oxoglutarate aminotransferase activity;pyridoxal phosphate binding;transaminase activity;transferase activity;transferase activity, transferring nitrogenous groups;vitamin B6 binding;vitamin binding	cell part;chloroplast;cytoplasmic part;intracellular membrane-bounded organelle;intracellular organelle;intracellular part;membrane-bounded organelle;organelle;plastid		11	10	1	27.9	25.9	3.5	50.585	0	27.928	7140200000	103	1.75427	0.061522
C6T4I7;I1NB92	Ribosomal protein L19	100527501 GLYMA_19G213200	29.71	29.444	28.2794	29.1962	29.0083	29.3675	28.6246	28.9612	28.412	29.1039	29.1475	29.0219	28.9037	28.5511	28.376	28.2532	27.6042	28.3257	28.6954	27.9231	28.4497	28.5567	28.4594	biosynthetic process;cellular biosynthetic process;cellular macromolecule biosynthetic process;cellular macromolecule metabolic process;cellular metabolic process;cellular process;cellular protein metabolic process;macromolecule biosynthetic process;macromolecule metabolic process;metabolic process;primary metabolic process;protein metabolic process;translation	structural constituent of ribosome;structural molecule activity	cell part;cytoplasmic part;intracellular non-membrane-bounded organelle;intracellular organelle;intracellular part;macromolecular complex;non-membrane-bounded organelle;organelle;ribonucleoprotein complex;ribosome		9	9	1	35.8	35.8	9.4	24.628	0	161.85	10292000000	139	1.74886	0.0621827
I1LIY4;K7LST1	Uncharacterized protein	100776898 GLYMA_11G105500	27.7573	27.8274	27.6454	28.0259	27.9784	27.889	27.366	27.2085	26.9632	27.4479	27.582	27.5016	27.7373	27.232		27.2469		27.4799	27.747	27.0471	27.5535	27.5674	27.11		binding;catalytic activity;GTP binding;guanyl nucleotide binding;guanyl ribonucleotide binding;hydrolase activity;hydrolase activity, acting on acid anhydrides;nucleotide binding;purine nucleotide binding;purine ribonucleoside triphosphate binding;purine ribonucleotide binding;ribonucleotide binding			9	9	9	15.9	15.9	15.9	149.34	0	19.956	3981900000	31	1.74777	0.0622289
C6TED1	Peroxidase (EC 1.11.1.7)	100789782 GLYMA_08G179700	28.1232	28.96	28.3554	28.3095	28.1286	28.0648	27.4755	27.8237	27.7596	28.2726	27.8779	28.7115	28.4224	28.4083	28.4094	28.4354	28.4317	29.3054	28.746	28.4489	28.2471	29.0943	28.936	response to chemical stimulus;response to oxidative stress;response to stimulus;response to stress	antioxidant activity;binding;catalytic activity;cation binding;heme binding;ion binding;iron ion binding;metal ion binding;oxidoreductase activity;oxidoreductase activity, acting on peroxide as acceptor;peroxidase activity;tetrapyrrole binding;transition metal ion binding	extracellular region		9	9	3	38.8	38.8	16.9	34.702	0	99.637	7452100000	55	1.74621	0.0623433
I1JXY2	Uncharacterized protein	100817168 GLYMA_04G209000	29.3542	29.114	29.477	29.32	28.9755	29.1075	29.0158	28.9533	29.1054	29.102	29.222	28.996	28.8527	29.101	28.9558	29.1708	28.9267	28.8754	28.8831	28.8089	28.8389	28.7769	29.0326	carbohydrate metabolic process;metabolic process;primary metabolic process	binding;carbohydrate binding;catalytic activity;hydrolase activity;hydrolase activity, acting on glycosyl bonds;hydrolase activity, hydrolyzing O-glycosyl compounds			18	18	18	24	24	24	103.96	0	238.07	11418000000	235	1.74121	0.0629539
I1JED9;C6SXT0;I1JED8;C6TG21	Uncharacterized protein	GLYMA_02G116100	26.7699	26.0913	26.4924	26.0803	26.9632			25.7704	25.4244		25.2581	25.6214	25.4434	25.4146	25.2116		25.471											1	1	1	6.1	6.1	6.1	21.629	0	25.008	921750000	11	1.73386	0.0639163
I1KNL8;I1MQX4;I1MQX3;I1KNL7;C6T278	Uncharacterized protein	100500596 GLYMA_07G268500						25.0853	25.0623	25.7154	25.4226	26.2578	26.0962	26.0989			25.3938				26.8173			26.6255			catalytic activity;transferase activity;transferase activity, transferring acyl groups;transferase activity, transferring acyl groups other than amino-acyl groups			3	2	2	9.6	7	7	35.923	0	6.3207	930520000	26	1.72848	0.0645991
Q6VEV1;I1K759;C6SW17;I1K758;C6TBE7	40S ribosomal protein S25 (Fragment)		28.2382	28.6733	27.3082	27.5981	27.5241	27.1708	27.2429	27.8092	27.719	27.1593	27.6846	27.9105	27.5464	27.0594	27.155	27.275	27.1864	27.1676	26.66	26.3789	27.2521	26.9222	26.8448			cell part;cytoplasmic part;intracellular non-membrane-bounded organelle;intracellular organelle;intracellular part;macromolecular complex;non-membrane-bounded organelle;organelle;ribonucleoprotein complex;ribosome		3	3	1	39.4	39.4	14.9	10.504	0	44.183	4219500000	63	1.72548	0.0649343
K7KYM7;A0A0R0JNE0	Glycosyltransferase (EC 2.4.1.-)	100787088 GLYMA_06G320800	27.9364	27.4301	27.8795	27.4471	27.1813	27.309	27.6176	27.3916	27.1908	27.6915	27.7054	27.5568	27.4277	27.4789	27.4126	27.5944	26.8391	26.8569	26.9961	27.1602	27.698	27.4146	27.5243		catalytic activity;transferase activity;transferase activity, transferring glycosyl groups;transferase activity, transferring hexosyl groups			8	8	8	14.4	14.4	14.4	52.905	0	25.082	3686500000	87	1.72228	0.0651862
Q9SPB8;I1KDM8;C6T7I4	Malate dehydrogenase (EC 1.1.1.37)	Mdh1 606509 GLYMA_12G159300	31.4664	31.5251	31.8336	31.9239	31.8999	32.1755	31.9875	31.7836	31.9894	31.6892	31.7311	31.5347	31.8558	31.9169	32.2524	31.8718	32.2788	31.9688	31.8927	31.973	32.0406	31.5899	31.8567	acetyl-CoA catabolic process;acetyl-CoA metabolic process;carbohydrate metabolic process;carboxylic acid metabolic process;catabolic process;cellular catabolic process;cellular ketone metabolic process;cellular metabolic process;cellular process;coenzyme catabolic process;coenzyme metabolic process;cofactor catabolic process;cofactor metabolic process;dicarboxylic acid metabolic process;malate me…	catalytic activity;L-malate dehydrogenase activity;malate dehydrogenase activity;oxidoreductase activity;oxidoreductase activity, acting on CH-OH group of donors;oxidoreductase activity, acting on the CH-OH group of donors, NAD or NADP as acceptor			13	13	11	54.5	54.5	47.8	36.141	0	323.31	80073000000	323	1.72273	0.0651862
I1N5D5;I1KZK2	Uncharacterized protein	100811946 GLYMA_18G298100	27.9762	28.3291	27.4965	28.0676	28.0313	28.0494	27.7769	27.6923	27.5671	27.7956	27.9633	27.9612	27.9621	27.7207	27.4594	27.5335	27.065	27.4769	27.6087	27.5743	27.6664	28.1893	27.9265	cellular macromolecule metabolic process;cellular metabolic process;cellular process;cellular protein metabolic process;macromolecule metabolic process;metabolic process;primary metabolic process;protein folding;protein metabolic process	adenyl nucleotide binding;adenyl ribonucleotide binding;ATP binding;binding;nucleotide binding;purine nucleotide binding;purine ribonucleoside triphosphate binding;purine ribonucleotide binding;ribonucleotide binding	cell part;cytoplasm;intracellular part		8	8	8	14.4	14.4	14.4	59.021	0	32.063	4882700000	36	1.71927	0.0655125
Q5F2M9;C6TDZ0	Glutamate dehydrogenase	gdh1 547687 GLYMA_16G041200	29.4123	29.8632	29.5402	29.4066	30.5533	29.9443	30.2037	30.3101	30.6766	30.5831	30.5419	29.8875	30.2978	30.5405	30.9558	30.5929	31.3938	30.6941	30.4237	30.0578	30.2848	29.6753	30.3578	amine metabolic process;carboxylic acid metabolic process;cellular amine metabolic process;cellular amino acid metabolic process;cellular ketone metabolic process;cellular metabolic process;cellular nitrogen compound metabolic process;cellular process;metabolic process;nitrogen compound metabolic process;organic acid metabolic process;oxoacid metabolic process;primary metabolic process;small mole…	catalytic activity;oxidoreductase activity;oxidoreductase activity, acting on the CH-NH2 group of donors;oxidoreductase activity, acting on the CH-NH2 group of donors, NAD or NADP as acceptor			18	18	10	53.3	53.3	31.6	44.548	0	168.31	30305000000	248	1.7186	0.0655125
A0A0R0G6D0;I1MJF7;A0A0R0GHM3	Uncharacterized protein	100811882 GLYMA_15G265300	25.2599	25.4707	25.0082	24.6497	25.2367	25.8082	23.8181	24.5999	24.3686	24.3062	24.6406	24.6407	24.4482	24.3996		24.6791			24.3672	24.5326	24.4034		24.5871	establishment of localization;establishment of localization in cell;establishment of protein localization;intracellular protein transport;intracellular transport;nuclear import;nuclear transport;nucleocytoplasmic transport;protein import;protein import into nucleus;protein targeting;protein transport;transport		cell part;intracellular organelle part;intracellular part;macromolecular complex;membrane part;nuclear part;nuclear pore;organelle part;pore complex;protein complex		6	6	6	4	4	4	231.19	0	17.99	470090000	21	1.71563	0.0658479
I1MJE1;A0A0R4J5H1	Succinate-semialdehyde dehydrogenase (EC 1.2.1.24)	100808318 GLYMA_15G263500	28.0623	28.1733	27.9436	28.726	28.9469	28.4456	28.5962	28.3129	28.1011	28.4878	28.3753	28.4174	28.6705	28.3996	28.4248	28.8474	28.242	28.722	29.0111	28.565	28.3603	28.412	28.4502	amine catabolic process;amine metabolic process;carboxylic acid catabolic process;carboxylic acid metabolic process;catabolic process;cellular amine metabolic process;cellular amino acid catabolic process;cellular amino acid metabolic process;cellular catabolic process;cellular ketone metabolic process;cellular metabolic process;cellular nitrogen compound metabolic process;cellular process;gamma-…	catalytic activity;oxidoreductase activity;oxidoreductase activity, acting on the aldehyde or oxo group of donors;oxidoreductase activity, acting on the aldehyde or oxo group of donors, NAD or NADP as acceptor;succinate-semialdehyde dehydrogenase [NAD(P)+] activity			14	14	7	41.2	41.2	24.4	52.819	0	323.31	8434100000	130	1.71458	0.0658937
C6SX05;E0YNQ4	Dirigent protein	100305879 GLYMA_11G150400	30.3768	29.7943	30.3083	30.17	30.1378	30.2272	29.7789	29.699	29.8969	29.6172	29.6166	29.8161	29.8724	29.7144	29.6921	29.5891	30.0534	29.9375	29.6078	29.6982	29.7398	29.8087	29.906					5	5	5	35.1	35.1	35.1	21.23	0	16.866	20653000000	106	1.71269	0.0660654
Q42799;A0A0R0EM40	Cytochrome P450 93A2 (EC 1.14.-.-)	CYP93A2	26.9909	26.2092	26.8298	26.8627	27.2316		27.2881	27.0206	27.6954	27.6873	27.3332	27.7253	27.6933	27.1626	27.193	27.2503	26.7256	27.4262	28.1907	27.6276	27.5746	27.4357	27.4775		binding;catalytic activity;cation binding;heme binding;ion binding;iron ion binding;metal ion binding;monooxygenase activity;oxidoreductase activity;oxidoreductase activity, acting on paired donors, with incorporation or reduction of molecular oxygen;tetrapyrrole binding;transition metal ion binding	cell part;membrane		9	9	8	17.9	17.9	14.9	57.176	0	50.478	3514400000	57	1.71016	0.0662239
I1JZZ2;I1MTI4	Uncharacterized protein	100807921 GLYMA_05G036600	27.1504	27.0037	27.4113	26.9268	27.1686	27.0677	26.5256	27.4147	26.7543	26.6568	27.0535	26.4611	26.5019	26.6901	26.156	26.4777	26.3178	26.4904	26.3384	26.8293	26.7951			biological regulation;regulation of biological process;regulation of cellular process;regulation of response to stimulus;regulation of signal transduction;regulation of signaling	adenyl nucleotide binding;adenyl ribonucleotide binding;ATP binding;binding;catalytic activity;kinase activity;nucleotide binding;phosphotransferase activity, alcohol group as acceptor;protein kinase activity;protein serine/threonine kinase activity;purine nucleotide binding;purine ribonucleoside triphosphate binding;purine ribonucleotide binding;ribonucleotide binding;transferase activity;transf…			7	7	6	14.1	14.1	12	43.745	0	11.794	2348700000	38	1.71072	0.0662239
A0A0R0JDW1;I1JUS7;I1K9A0	Eukaryotic translation initiation factor 3 subunit L (eIF3l)	100786533 GLYMA_06G082500	26.8237	26.5812	26.8729	26.4432		26.4835	26.4551	26.051			26.1764	26.2245	26.0578	26.4384	26.2824	26.0963	26.0997				26.4334	26.6241		biological regulation;cellular component assembly;cellular component assembly at cellular level;cellular component organization;cellular component organization at cellular level;cellular component organization or biogenesis;cellular component organization or biogenesis at cellular level;cellular macromolecular complex assembly;cellular macromolecular complex subunit organization;cellular process;…	binding;nucleic acid binding;RNA binding;translation factor activity, nucleic acid binding;translation initiation factor activity	cell part;cytoplasmic part;eukaryotic 43S preinitiation complex;eukaryotic 48S preinitiation complex;eukaryotic translation initiation factor 3 complex;intracellular part;macromolecular complex;protein complex;ribonucleoprotein complex;translation preinitiation complex		2	2	2	4.2	4.2	4.2	53.752	0	5.1049	1540400000	15	1.70686	0.0666133
Q948P0;I1NBM7;K7KGI6	Aspartic proteinase 2	soyAP2	25.5902	25.9729			25.2404	25.5416	25.4384	25.6397		25.7321	25.7322		25.6749	26.0937	26.3392	25.9518	26.5558	26.2922	26.2623			26.0012		lipid metabolic process;metabolic process;primary metabolic process	aspartic-type endopeptidase activity;aspartic-type peptidase activity;catalytic activity;endopeptidase activity;hydrolase activity;peptidase activity;peptidase activity, acting on L-amino acid peptides			5	5	5	14.2	14.2	14.2	55.509	0	27.929	1008600000	23	1.70606	0.0666224
I1JJF7	Uncharacterized protein	100811399 GLYMA_02G296400	30.0032	30.0414	30.1055	29.5137	30.195	29.8247	29.7443	29.7148	29.7022	29.6137	29.4567	29.4	29.6435	29.4034	29.7537	29.3404	29.9987	29.729	29.6008	29.4198	29.3935	29.0933	29.4863	alcohol metabolic process;alditol metabolic process;carbohydrate metabolic process;cellular carbohydrate metabolic process;cellular metabolic process;cellular process;glycerol metabolic process;lipid metabolic process;metabolic process;polyol metabolic process;primary metabolic process;small molecule metabolic process	catalytic activity;glycerophosphodiester phosphodiesterase activity;hydrolase activity;hydrolase activity, acting on ester bonds;phosphoric diester hydrolase activity;phosphoric ester hydrolase activity			14	14	8	22.6	22.6	13.3	81.843	0	192.62	17672000000	193	1.69885	0.0675586
I1KWD9	Uncharacterized protein	100816697 GLYMA_08G244800								25.5421	24.8794		25.6841		25.0818	24.5953	25.4464	25.5837		26.1748	25.9582	26.4581	25.3636		25.7461		binding;calcium ion binding;catalytic activity;cation binding;ion binding;metal ion binding;transferase activity;transferase activity, transferring glycosyl groups;transferase activity, transferring hexosyl groups			2	2	2	7.2	7.2	7.2	49.507	0	5.4612	695730000	11	1.69851	0.0675586
I1KL36;C6TJB6	Uncharacterized protein	GLYMA_07G180100	24.4889		24.791	24.6714	24.5839		24.8803			24.5121	24.7956		25.2352			25.7634		25.0796	25.3775	25.4683			25.0935		catalytic activity;transferase activity;transferase activity, transferring acyl groups;transferase activity, transferring acyl groups other than amino-acyl groups			10	3	3	38.9	12.6	12.6	46.756	0	35.589	521980000	30	1.69552	0.0679089
A0A0R0GBB6;I1L171;Q94A52	Uncharacterized protein	100795032 GLYMA_15G158800	26.9591	26.6795	26.5248	26.5973	26.9979	26.5296	26.3709	26.3167	26.2611	26.1826	26.3441	26.1195	26.8893	26.2227	25.9925	26.2906	26.0237	26.1744	26.2034		26.2258	26.4963	25.9743		adenyl nucleotide binding;adenyl ribonucleotide binding;ATP binding;binding;catalytic activity;helicase activity;hydrolase activity;hydrolase activity, acting on acid anhydrides;hydrolase activity, acting on acid anhydrides, in phosphorus-containing anhydrides;nucleic acid binding;nucleoside-triphosphatase activity;nucleotide binding;purine nucleotide binding;purine ribonucleoside triphosphate bi…			9	7	7	20.4	18	18	45.971	0	15.876	1837500000	29	1.69163	0.0681584
A0A0R0KAL0;I1JXS7;A0A0R4J3K0	Uncharacterized protein	100802236 GLYMA_04G202900	28.3831	28.0852	28.3532	28.2498	27.9769	27.452	28.1167	27.9269	27.7542	27.4504	27.9444	27.4367	27.9758	27.9513	27.9175	27.6556	27.3823	27.5209	27.5399	27.8315	27.5823	27.4026	27.4808	cellular macromolecule metabolic process;cellular metabolic process;cellular process;cellular protein metabolic process;macromolecule metabolic process;metabolic process;primary metabolic process;protein folding;protein metabolic process	binding;calcium ion binding;cation binding;ion binding;metal ion binding	cell part;cytoplasmic part;endoplasmic reticulum;intracellular membrane-bounded organelle;intracellular organelle;intracellular part;membrane-bounded organelle;organelle		9	9	3	24.9	24.9	9.4	61.857	0	80.519	4994800000	91	1.69128	0.0681584
I1JFY8;A0A0R0L3E1;A0A0R0L554	Glycerol-3-phosphate dehydrogenase (EC 1.1.5.3)	100808564 GLYMA_02G165500	25.783	26.1867	26.0162	25.8169	26.2474		25.987	25.8794	26.0177	26.9356	26.4864	26.2672	26.6734	26.366	26.2874	26.2351		26.443	26.3455	26.4424	26.5065	26.3013		alcohol metabolic process;alditol metabolic process;carbohydrate metabolic process;cellular carbohydrate metabolic process;cellular metabolic process;cellular process;glycerol metabolic process;glycerol-3-phosphate metabolic process;metabolic process;organophosphate metabolic process;phosphate-containing compound metabolic process;phosphorus metabolic process;polyol metabolic process;primary meta…	catalytic activity;glycerol-3-phosphate dehydrogenase activity;oxidoreductase activity;oxidoreductase activity, acting on CH-OH group of donors;oxidoreductase activity, acting on the CH-OH group of donors, quinone or similar compound as acceptor;sn-glycerol-3-phosphate:ubiquinone oxidoreductase activity;sn-glycerol-3-phosphate:ubiquinone-8 oxidoreductase activity	cell part;cytoplasmic part;glycerol-3-phosphate dehydrogenase complex;intracellular part;macromolecular complex;protein complex		8	8	8	16.5	16.5	16.5	68.766	0	14.69	1629700000	23	1.69098	0.0681584
I1NCA1	Uncharacterized protein	100805955 GLYMA_19G245500							25.7526	26.2625	26.4045	27.3709		26.8811	26.849	26.7438	26.406	26.8407	26.7129	27.2024	26.889	26.8653	27.0635	26.6906	26.4986	defense response;defense response to bacterium;defense response to fungus;multi-organism process;response to bacterium;response to biotic stimulus;response to fungus;response to other organism;response to stimulus;response to stress	binding;carbohydrate binding;chitin binding;pattern binding;polysaccharide binding			4	2	2	32.5	16	16	20.698	0	38.014	1780700000	17	1.69276	0.0681584
A0A0R0J3D8;O22518;A0A0R0IZE4	40S ribosomal protein SA	548014 GLYMA_07G043800	29.8188	29.8994	29.7105	29.9396	30.071	29.2197	29.6604	29.3292	29.3025	29.0375	29.183	29.5803	29.5557	29.0675	29.3065	28.9774	28.2297	29.0708	29.0968	28.8828	28.9449	29.2066	29.2163	biosynthetic process;cellular biosynthetic process;cellular component assembly;cellular component assembly at cellular level;cellular component organization;cellular component organization at cellular level;cellular component organization or biogenesis;cellular component organization or biogenesis at cellular level;cellular macromolecular complex assembly;cellular macromolecular complex subunit o…	structural constituent of ribosome;structural molecule activity	cell part;cytosolic small ribosomal subunit;intracellular organelle part;intracellular part;macromolecular complex;organelle part;ribonucleoprotein complex;small ribosomal subunit		13	13	1	46.8	46.8	4.3	30.886	0	144.36	14597000000	163	1.68736	0.0683802
C6F117;K7MAP3;I1LFR8;C6T5L3	Putative ribosomal protein S15	100799973 GLYMA_01G240000 GLYMA_07G255500 GLYMA_11G003600 GLYMA_11G003700 GLYMA_17G018600	29.5593	29.6491	29.6918	29.3766	29.3309	29.2826	29.672	29.148	29.6394	29.1134	29.0887	29.2144	29.2199	29.1265	29.6584	29.0844	29.2387	28.7549	29.1987	29.1437	29.115	28.9636		biosynthetic process;cellular biosynthetic process;cellular macromolecule biosynthetic process;cellular macromolecule metabolic process;cellular metabolic process;cellular process;cellular protein metabolic process;macromolecule biosynthetic process;macromolecule metabolic process;metabolic process;primary metabolic process;protein metabolic process;translation	structural constituent of ribosome;structural molecule activity	cell part;cytoplasmic part;intracellular non-membrane-bounded organelle;intracellular organelle;intracellular part;macromolecular complex;non-membrane-bounded organelle;organelle;ribonucleoprotein complex;ribosome		5	5	5	45.4	45.4	45.4	14.774	0	13.099	13813000000	47	1.68781	0.0683802
I1KNJ0;K7LIN7	Uncharacterized protein	100788703 GLYMA_07G265500	28.0879	27.6692	28.5888	28.3566	26.3123	26.9993	28.0131	27.7457	27.535	28.6543	28.3912	29.195	27.9835	28.9037	26.8355	28.046	27.116	29.0714	28.2785	28.4948	28.2878	28.9027	29.212					12	12	11	96.9	96.9	96.9	14.576	0	323.31	6653000000	156	1.68841	0.0683802
I1NA96;P27991;I1JPN0;A0A0R0KUR1;A0A068JEJ1	Phenylalanine ammonia-lyase (EC 4.3.1.24)	100811101 GLYMA_19G182300				25.0566	25.4755		26.1186	26.5418				25.5795		26.0572		25.7183	26.0285	25.305	25.5108		25.5522	25.9072	25.7688	amine catabolic process;amine metabolic process;aromatic amino acid family catabolic process;aromatic amino acid family metabolic process;aromatic compound biosynthetic process;aromatic compound catabolic process;biosynthetic process;carboxylic acid catabolic process;carboxylic acid metabolic process;catabolic process;cellular amine metabolic process;cellular amino acid catabolic process;cellular…	ammonia-lyase activity;carbon-nitrogen lyase activity;catalytic activity;lyase activity;phenylalanine ammonia-lyase activity	cell part;cytoplasm;intracellular part		6	2	2	11.2	3.7	3.7	77.794	0	6.0706	1050600000	14	1.6841	0.0687805
C6T142;C6SWA7;I1N263	Small ubiquitin-related modifier (SUMO)	100500241 GLYMA_08G320500	26.5882	27.3588			26.2735	26.5805	26.3642	26.3887	25.7932		25.7852	25.2155	25.7104	25.5405	26.2095		25.9347		25.9397	26.0547						cell part;intracellular membrane-bounded organelle;intracellular organelle;intracellular part;membrane-bounded organelle;nucleus;organelle		2	2	2	33.3	33.3	33.3	11.205	0	40.686	1225200000	20	1.68101	0.0691545
C6TDV2;I1JBB6;C6ZRX5	Serine/threonine protein kinase	100808383 GLYMA_10G009100	27.1117	26.8367	26.714	26.844	26.4494	26.9754	26.3989	26.5125	26.0046	26.0199	26.335	26.4436	26.4432		26.5721	25.8847	25.5998	26.0894	26.1187		26.0442	26.0908	26.4721	biological regulation;regulation of biological process;regulation of cellular process;regulation of response to stimulus;regulation of signal transduction;regulation of signaling	adenyl nucleotide binding;adenyl ribonucleotide binding;ATP binding;binding;catalytic activity;kinase activity;nucleotide binding;phosphotransferase activity, alcohol group as acceptor;protein kinase activity;protein serine/threonine kinase activity;purine nucleotide binding;purine ribonucleoside triphosphate binding;purine ribonucleotide binding;ribonucleotide binding;transferase activity;transf…			7	7	3	24.4	24.4	11.9	39.129	0	228.9	1830500000	41	1.67681	0.0697086
I1MCE8;I1M5U8	Uncharacterized protein	100814404 GLYMA_15G007100	27.4358	27.1806	27.4195	27.028	27.2104	26.8582	27.0552	26.7212	26.7157	26.8025	26.9819	27.2288	27.0028	26.9557	26.7307	26.824	26.71	26.6701	26.9176	26.9218	26.9994	27.2356	26.766	cellular macromolecule metabolic process;cellular metabolic process;cellular nitrogen compound metabolic process;cellular process;macromolecule metabolic process;metabolic process;mRNA metabolic process;mRNA processing;nitrogen compound metabolic process;nuclear mRNA splicing, via spliceosome;nucleic acid metabolic process;nucleobase-containing compound metabolic process;primary metabolic process…	binding;nucleic acid binding;RNA binding;snRNA binding;U5 snRNA binding;U6 snRNA binding	cell part;intracellular organelle part;intracellular part;macromolecular complex;nuclear part;organelle part;ribonucleoprotein complex;spliceosomal complex		11	11	11	5.2	5.2	5.2	275.69	0	55.786	2700400000	53	1.67405	0.0699194
I1M6E1;B6EBD6;I1JJL6	Uncharacterized protein	100807416 GLYMA_14G011600	28.2355	27.8171	27.9567	28.0379	27.8188	27.1546	27.8276	27.6107	27.9444	27.556	27.7328	27.7669	28.1561	27.9329	27.7982	27.539	27.1353	27.6078	27.287	26.8361	27.3186	26.9889	27.2644	cellular macromolecule metabolic process;cellular metabolic process;cellular process;cellular protein metabolic process;macromolecule metabolic process;metabolic process;primary metabolic process;protein folding;protein metabolic process;response to stimulus;response to stress	adenyl nucleotide binding;adenyl ribonucleotide binding;ATP binding;binding;nucleotide binding;purine nucleotide binding;purine ribonucleoside triphosphate binding;purine ribonucleotide binding;ribonucleotide binding			35	9	6	47.6	15.6	12.1	80.186	0	59.207	4521700000	81	1.67445	0.0699194
A0A0R0KKR3	Uncharacterized protein	100792657 GLYMA_03G066800	28.4136	27.766	28.0465	28.2665	28.4533	27.8315	28.6402	28.8891	28.9499	28.8392	28.8253	28.5945	28.4734	28.6864	28.5118	28.3875	28.7537	28.7737	28.3459	29.0389	28.6538	28.4727	29.0252		catalytic activity;oxidoreductase activity			12	12	9	41.9	41.9	33.5	35.178	0	72.474	8266500000	73	1.66915	0.0702218
C6TJG0;I1L1T1	Uncharacterized protein	100803033 GLYMA_09G072100	27.3896	27.8981	27.6528	28.0029	28.0949	27.946	28.4764	28.2516	28.1903	28.0047	28.2796	27.6333	28.4426	28.5292	28.4475	28.5016	27.9981	28.2833	27.9117	27.644	28.1647	28.0508	27.7948	cellular macromolecule metabolic process;cellular metabolic process;cellular process;cellular protein metabolic process;macromolecule metabolic process;metabolic process;primary metabolic process;protein folding;protein metabolic process	adenyl nucleotide binding;adenyl ribonucleotide binding;ATP binding;binding;nucleotide binding;purine nucleotide binding;purine ribonucleoside triphosphate binding;purine ribonucleotide binding;ribonucleotide binding	cell part;cytoplasm;intracellular part		7	7	1	36	36	4.7	26.656	0	57.176	6324700000	76	1.66712	0.0702218
[truncated: 1,375 more rows]

## Sheet: Table S5
Table S5.List of exclusive proteins in soybean plants exposed to 200 μg/mL CdS-QDs
Uniprot ID	Protein names	Gene names	GO (biological process)	GO (cellular component)	GO (molecular function)	CdS-QD Treatments
[truncated: 22 more rows]

## Sheet: Table S6
Table S6. List of common proteins present in the soybean roots exposed to all Cd treatments (200 μg/mL CdS-QDs, 100 μg/mL BULK, and 10 μg/mL ION)
[truncated: 66 more rows]

[truncated: 2 more sheets: Table S7, Table S12]
